# Supplementary material for: Simple access to 5-carboalkoxy-2,3-dihydro-4H-pyran-4-ones via domino acylative electrocyclization: the first three step total synthesis of the dihydronaphthopyran-4-one class of natural products
Source: Royal Society of Chemistry journal article supplement (doi:10.1039/c4ra11174e), 2014-01-01

## Supporting Information

### **Simple access to 5-carboalkoxy-2,3-dihydro-4*H*-pyran-4-ones via domino acylative electrocyclization: First three step total synthesis of dihydronaphthopyran-4-one class of natural products**

Andivelu Ilangovan\* and Palaniappan Sakthivel

School of Chemistry, Bharathidasan University, Tiruchirappalli – 620 024, Tamil Nadu, India

E-mail: [ilangovanbdu@yahoo.com](mailto:ilangovanbdu@yahoo.com); Fax: +91-431-2407045; Tel: +91-431-2407053-Extn. 635.

---

#### **Table of Contents**

---

|                                                              |    |
|--------------------------------------------------------------|----|
| X-ray analysis of compound <b>3ga</b>                        | S1 |
| References                                                   | S4 |
| Copies of <sup>1</sup> H NMR and <sup>13</sup> C NMR Spectra | S5 |

---

## X-ray Analysis of Compound **3ga**

### **Single crystal X-ray diffraction**

A single crystal suitable for X-ray diffraction study was chosen carefully. The X-ray intensity measurements were done at room temperature (296 K) with Bruker SMART APEX-II CCD diffractometer using graphite monochromatic MoK $\alpha$  radiation ( $\lambda = 0.71073 \text{ \AA}$ ). The crystal structure of the compound **3ga** was solved and all the non-hydrogen atoms were refined anisotropically using the SHELX-2013 program.<sup>1</sup> The remaining H atoms were placed in idealized geometrical positions and constrained to ride on their parent atoms. The thermal ellipsoidal and crystal packing figures were produced using the programs PLATON<sup>2</sup> and MERCURY<sup>3</sup> respectively.

### **Crystal structure**

The crystal data and refinement parameters of the compound **3ga** are summarized in Table 1. The hydrogen bonding interactions that stabilize the crystal structure are listed in Table 2. The compound **3ga** crystallizes in the non-centrosymmetric space group  $P2_1/C$  which belongs to monoclinic crystal system. The asymmetric unit consists of two independent molecules, it is shown in the ORTEP diagram (Fig. 1). The structural superimposition was carried out to see any conformational changes on the molecular structure. All the non-hydrogen atoms of molecule (A and B) were used for the structural superimposition (Fig 2). The root mean square deviation (rmsd) between molecule A and B involving common atoms is 1.803  $\text{\AA}$ . In molecule A and B, the thiophene ring is rotated in the opposite direction and other part of the molecule is nearly the same (Fig. 2). The crystal structure of the title compound is stabilized by weak intermolecular C–H...O interactions (Table 2).

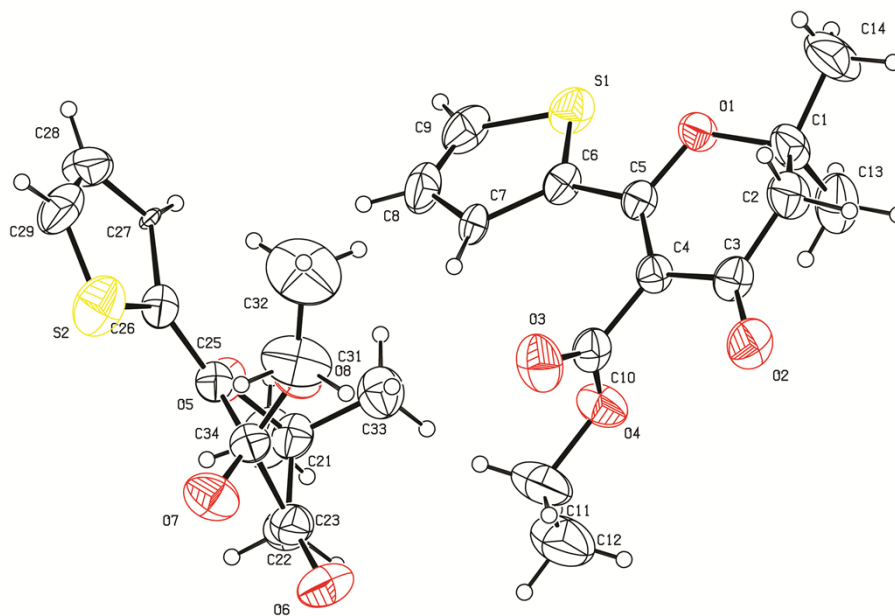

**Fig 1.** The ORTEP diagram of asymmetric unit of compound **3ga** with atom numbering scheme.

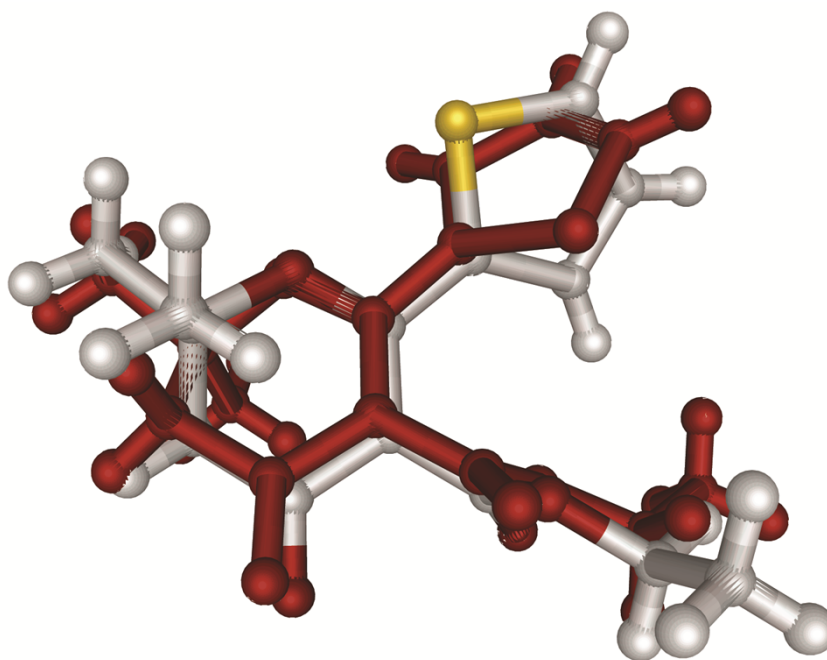

**Fig 2.** Structural superimposition of molecule A and B. (The molecule B in red colour).

**Table 1.** The crystal data and refinement parameters of compound **3ga**.

|                                                          |                                                  |
|----------------------------------------------------------|--------------------------------------------------|
| Compound                                                 |                                                  |
| Empirical formula                                        | C <sub>14</sub> H <sub>16</sub> O <sub>4</sub> S |
| Formula weight                                           | 280.33                                           |
| T (K)                                                    | 296(2)                                           |
| Wavelength (Å)                                           | 0.71073                                          |
| Crystal system                                           | Monoclinic                                       |
| Space group                                              | P2 <sub>1</sub> /c                               |
| a (Å)                                                    | 10.4001(2)                                       |
| b (Å)                                                    | 20.6610(6)                                       |
| c (Å)                                                    | 13.5979(4)                                       |
| α (°)                                                    | 90                                               |
| β (°)                                                    | 91.972(2)                                        |
| γ (°)                                                    | 90                                               |
| V (Å <sup>3</sup> )                                      | 2920.14(13)                                      |
| Z                                                        | 4                                                |
| Calculated density (Mg/m <sup>3</sup> )                  | 1.253                                            |
| Absorption (mm <sup>-1</sup> )                           | 0.114                                            |
| F(0 0 0)                                                 | 592                                              |
| Crystal size (mm)                                        | 0.10 × 0.09 × 0.09                               |
| θ (°)                                                    | 1.79– 21.89                                      |
| Limiting indices                                         | -10 ≤ h ≤ 10, -18 ≤ k ≤ 21, -14 ≤ l ≤ 14         |
| Reflections collected/unique (R <sub>int</sub> )         | 18926/3508, (0.042)                              |
| (θ °) Completeness (%)                                   | (25.242), 99.3 %                                 |
| Refinement method F <sup>2</sup>                         | full-matrix least-squares on F <sup>2</sup>      |
| Data/restraints /parameters                              | 3508/0/345                                       |
| Goodness-of-fit(GOF) on F <sup>2</sup>                   | 1.066                                            |
| Final R indices [I > 2σ(I)]                              | R <sub>1</sub> = 0.084, wR <sub>2</sub> = 0.259  |
| R indices (all data)                                     | R <sub>1</sub> = 0.1063, wR <sub>2</sub> = 0.289 |
| Largest difference in peak and hole (e Å <sup>-3</sup> ) | 1.089 and -0.674                                 |

**Table 2.** H bond Table

Hydrogen-bond geometry (Å, °)

| D—H···A                                                 | D—H  | H···A | D···A    | D—H···A |
|---------------------------------------------------------|------|-------|----------|---------|
| C2—H2A···O7 <sup>i</sup>                                | 0.97 | 2.62  | 3.567(8) | 165.1   |
| C9—H9···O2 <sup>ii</sup>                                | 0.93 | 2.52  | 3.291(7) | 140.7   |
| Symmetric codes: (i) -x, y-1/2, -z+1/2; (ii) x+1, y, z. |      |       |          |         |

## References:

1. G. M. Sheldrick, *Acta Crystallogr. Sect. A: Found. Crystallogr.*, 2008, **64**, 112-122.
2. A. Spek, *J. Appl. Crystallogr.*, 2003, **36**, 7-13.
3. C. F. Macrae, P. R. Edgington, P. McCabe, E. Pidcock, G. P. Shields, R. Taylor, M. Towler and J. v. d. Streek, *J. Appl. Crystallogr.*, 2006, **39**, 453-457.

### Copies of <sup>1</sup>H NMR and <sup>13</sup>C NMR Spectra

7.531  
7.514  
7.510  
7.491  
7.472  
7.454  
7.407  
7.388  
7.370  
7.260

4.080  
4.062  
4.044  
4.026

— 2.646

— 1.561

0.995  
0.977  
0.960

PYR-EBASC  
05/03/2010  
PROTON CDC13

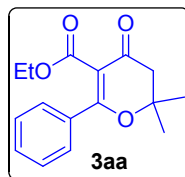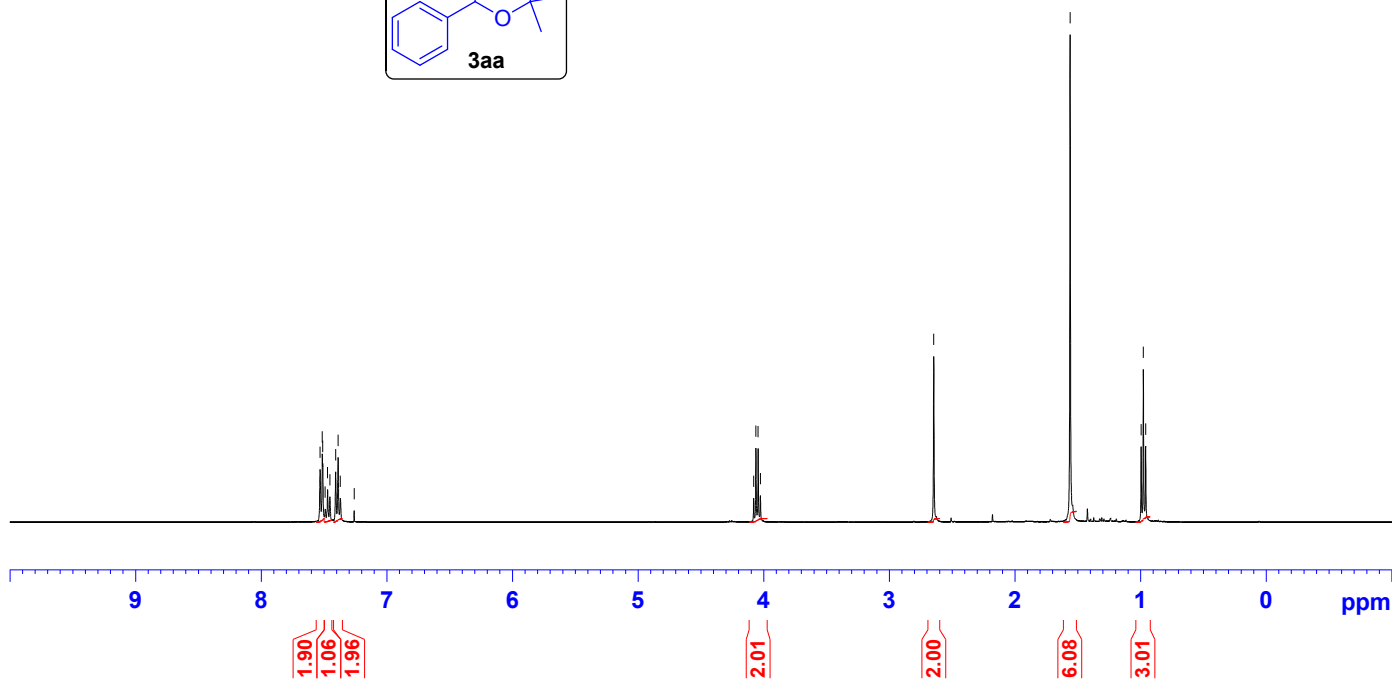

PYr-EBASc  
05/04/2010  
C13CPD CDC13

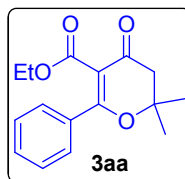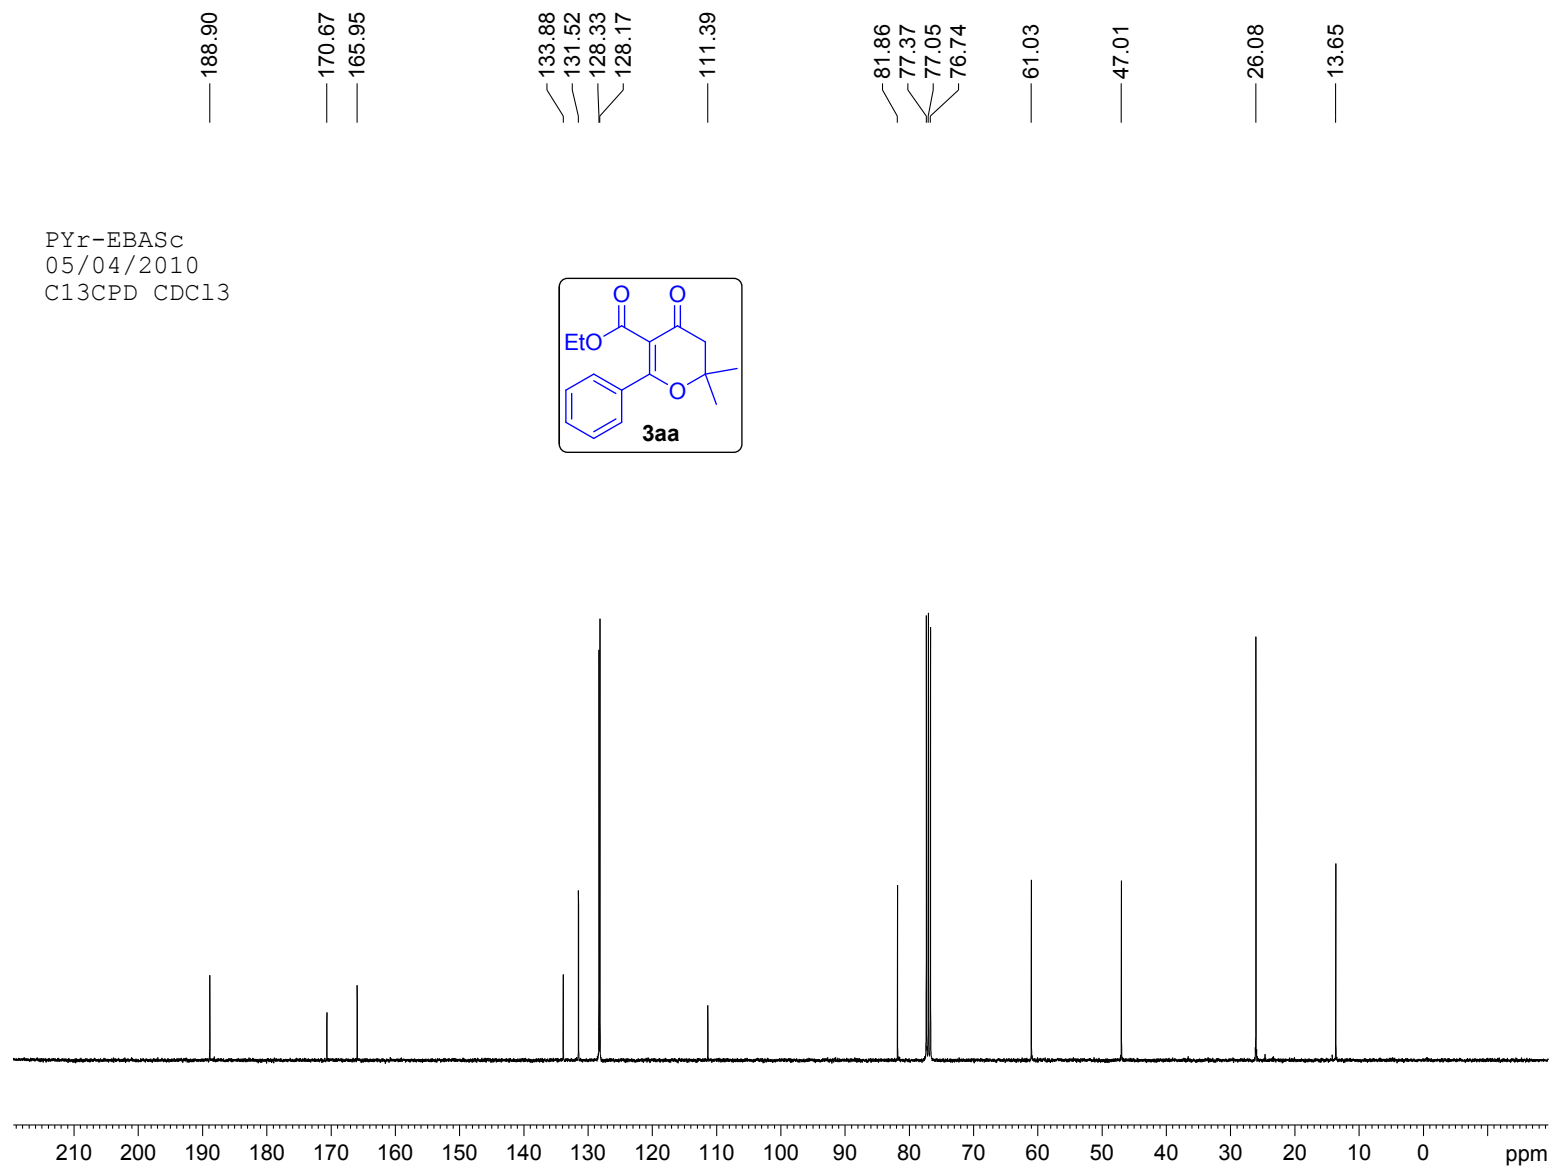

PYR-4-MeEBA  
27/02/2012  
PROTON CDC13

7.424  
7.404  
7.260  
7.189  
7.169

4.096  
4.079  
4.061  
4.043

2.619  
2.364

1.538  
1.034  
1.016  
0.998

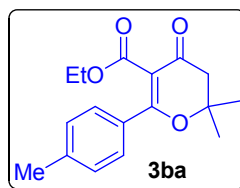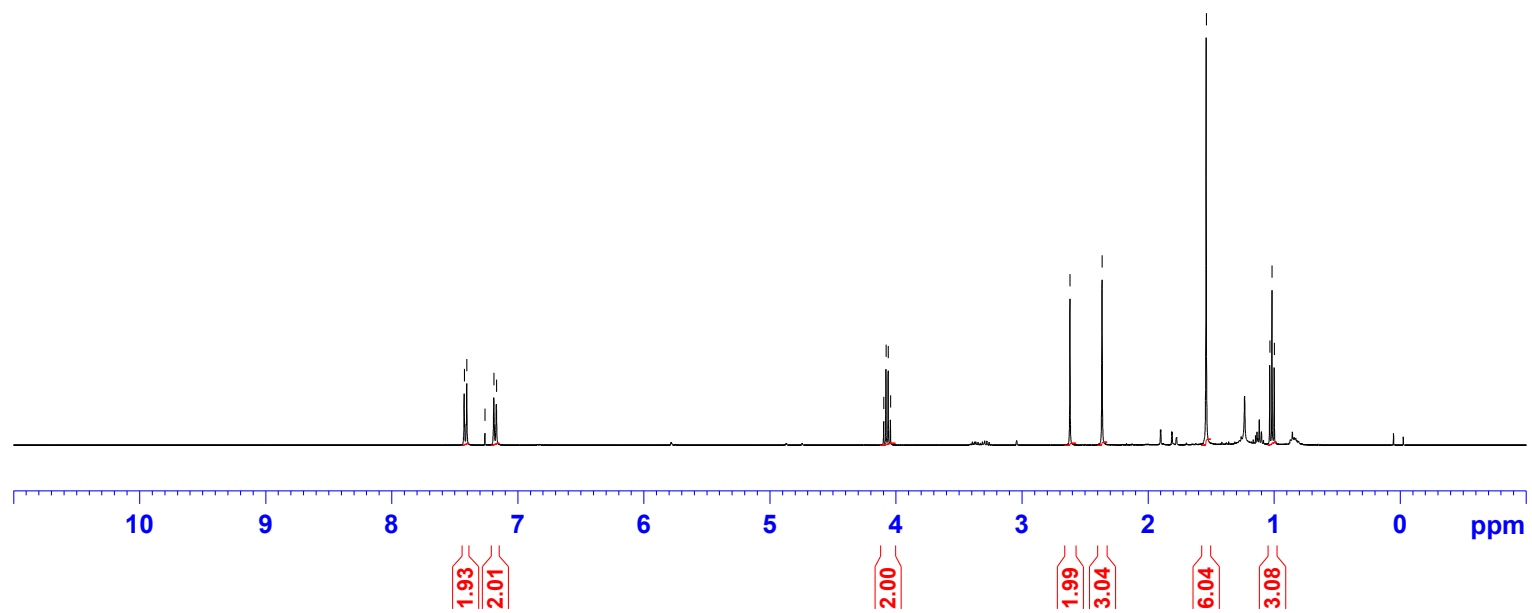



PYR-4MeEBA  
27/02/2012  
C13CPD CDC13

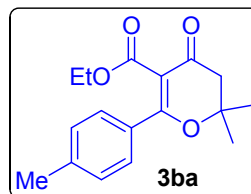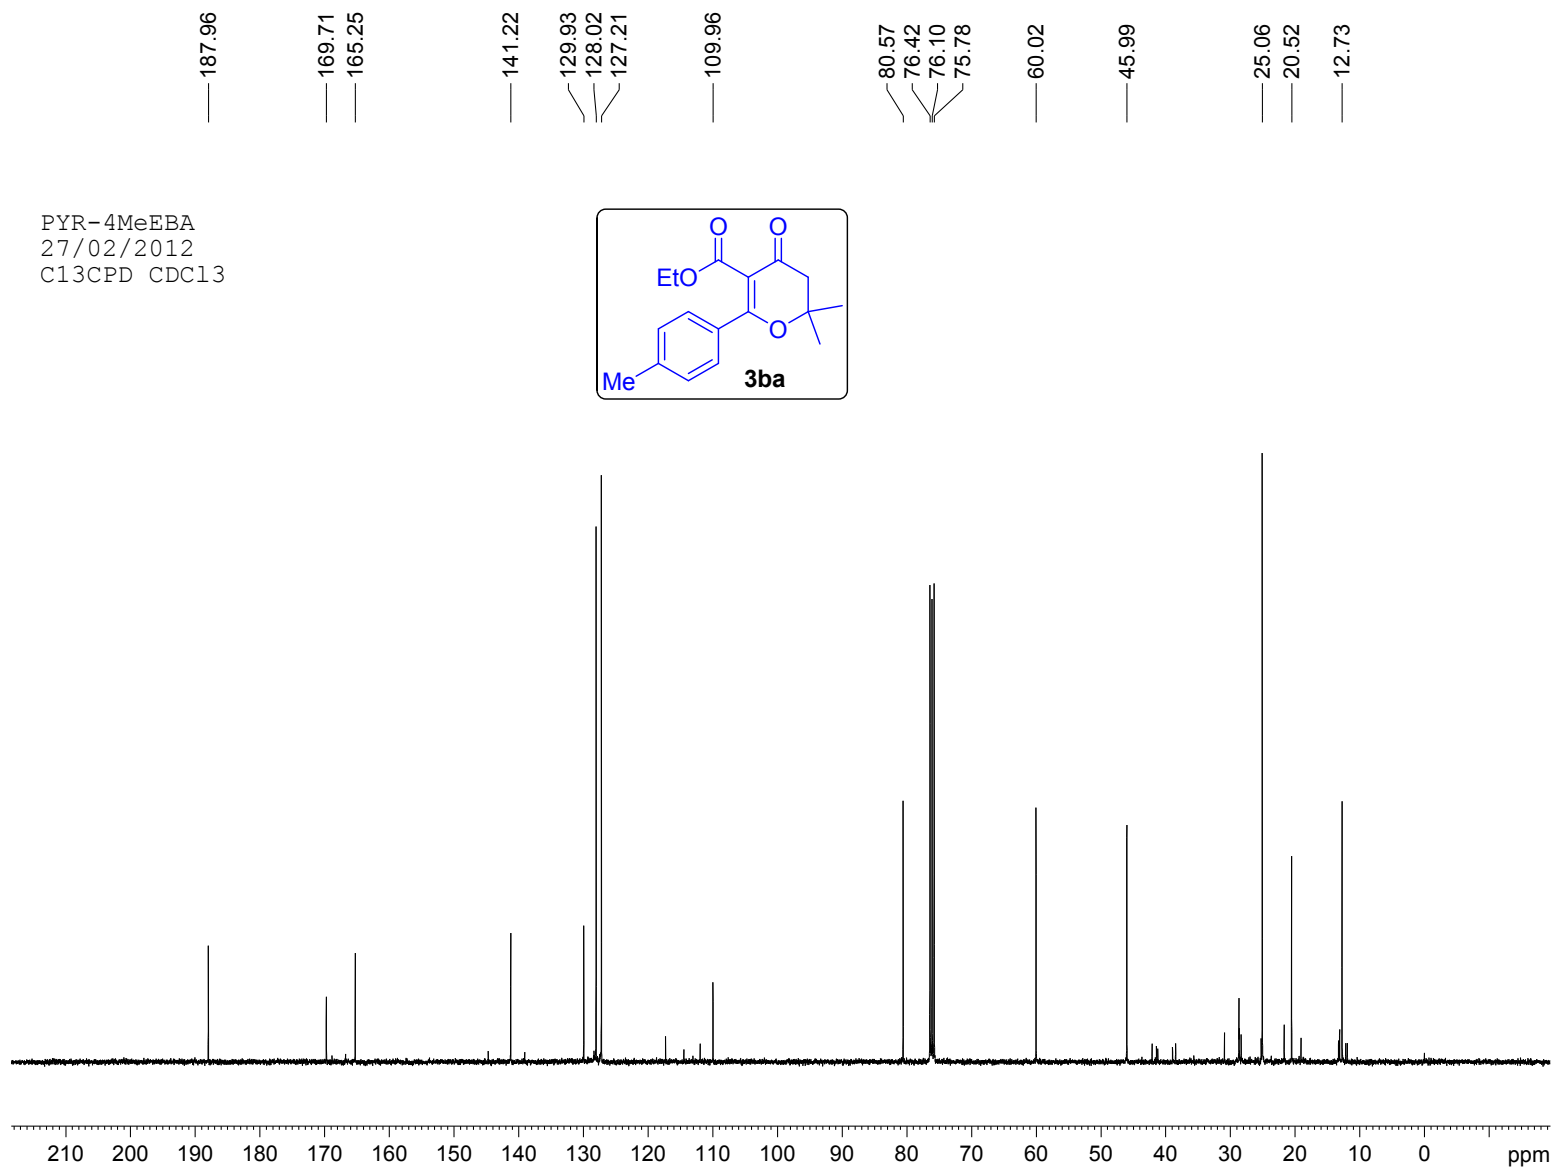

PYR-4-OMeEBA  
26/01/2012  
PROTON CDC13

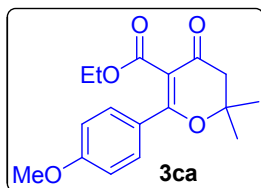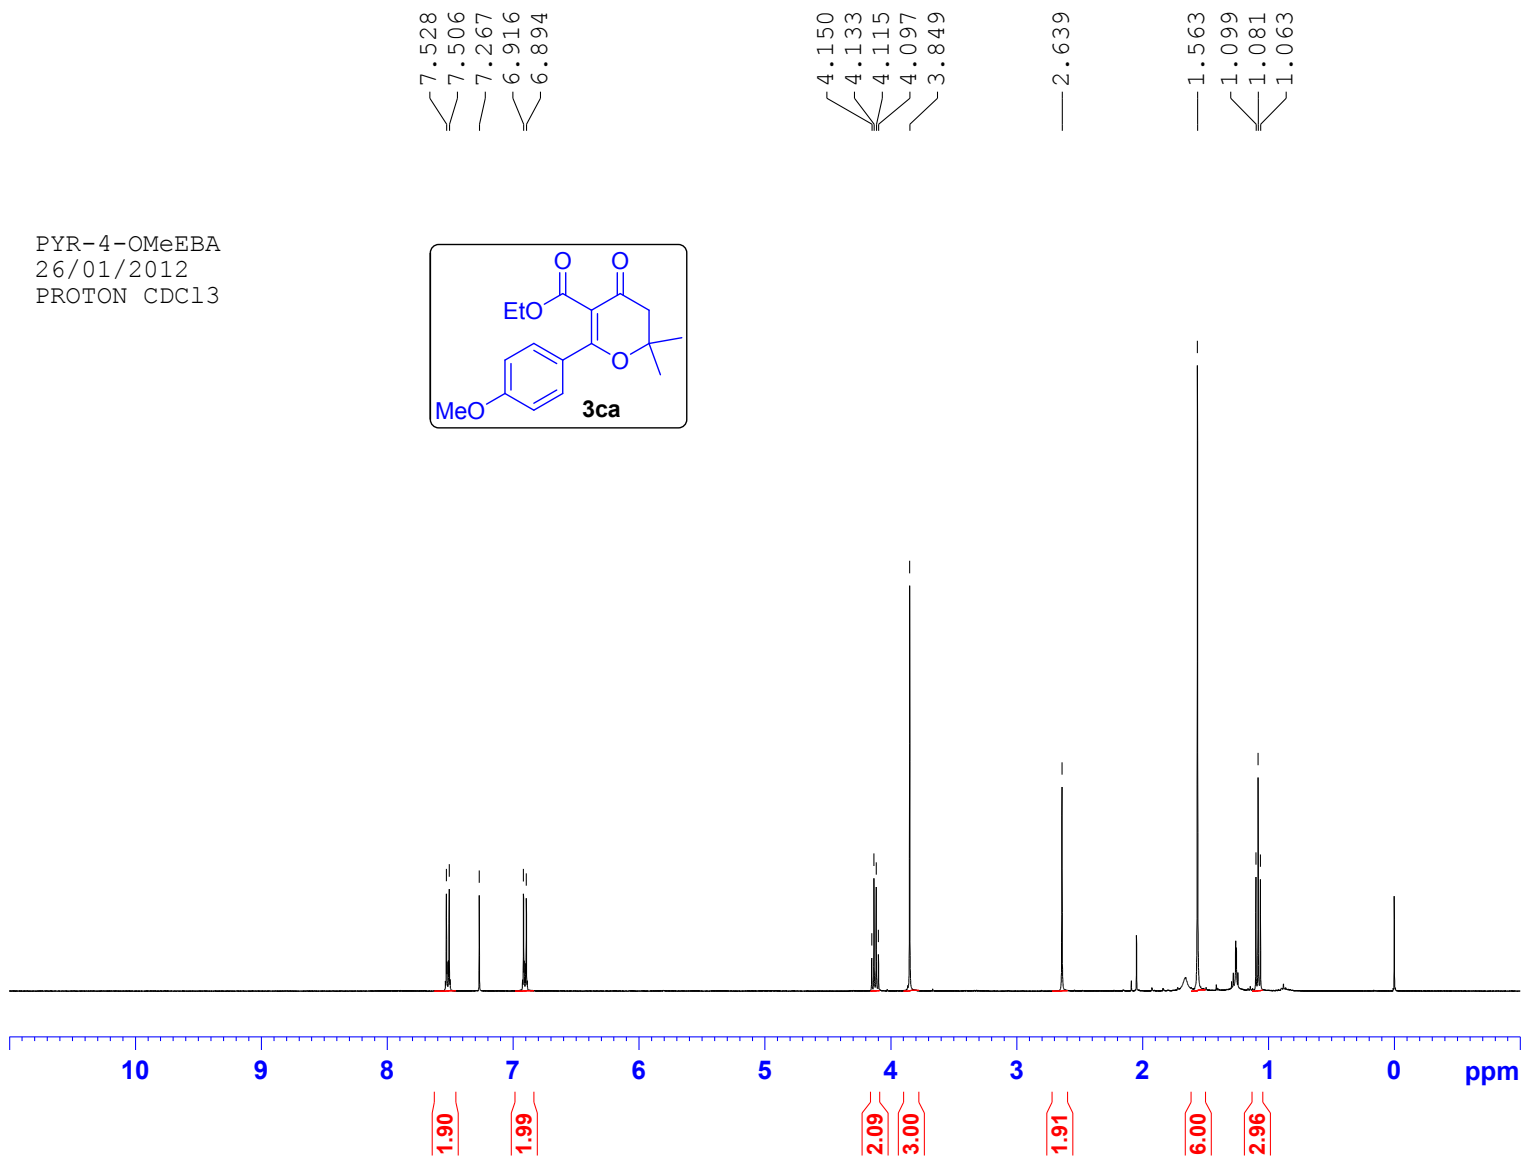

— 188.99  
 — 170.28  
 — 166.52  
 — 162.44  
  
 — 130.19  
 — 125.94  
  
 — 113.77  
 — 110.41  
  
 — 81.36  
 — 77.40  
 — 77.09  
 — 76.77  
  
 — 61.08  
 — 55.46  
 — 47.01  
  
 — 26.10  
  
 — 13.86

PYR-4-OMeEBA-SC  
 26/01/2012  
 C13CPD CDC13

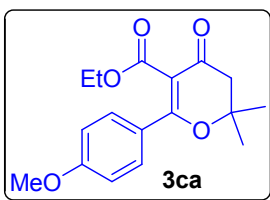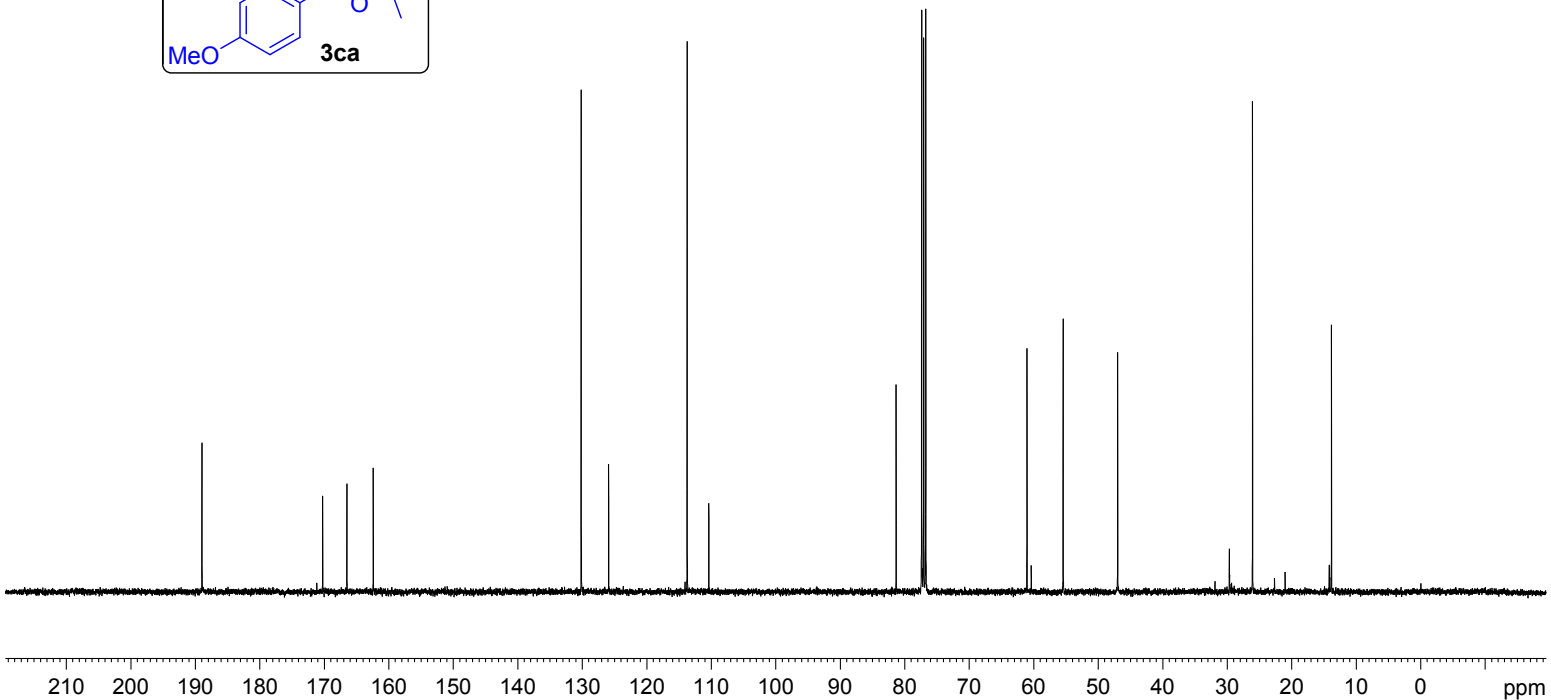

PYR-3,4,5-OMe-SC  
22/08/2013  
PROTON CDC13

— 7.260

— 6.767

4.119  
4.101  
4.084  
4.066  
3.858  
3.844

— 2.632

— 1.562  
— 1.075  
— 1.057  
— 1.040

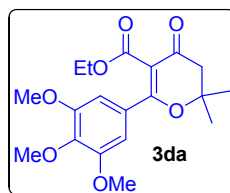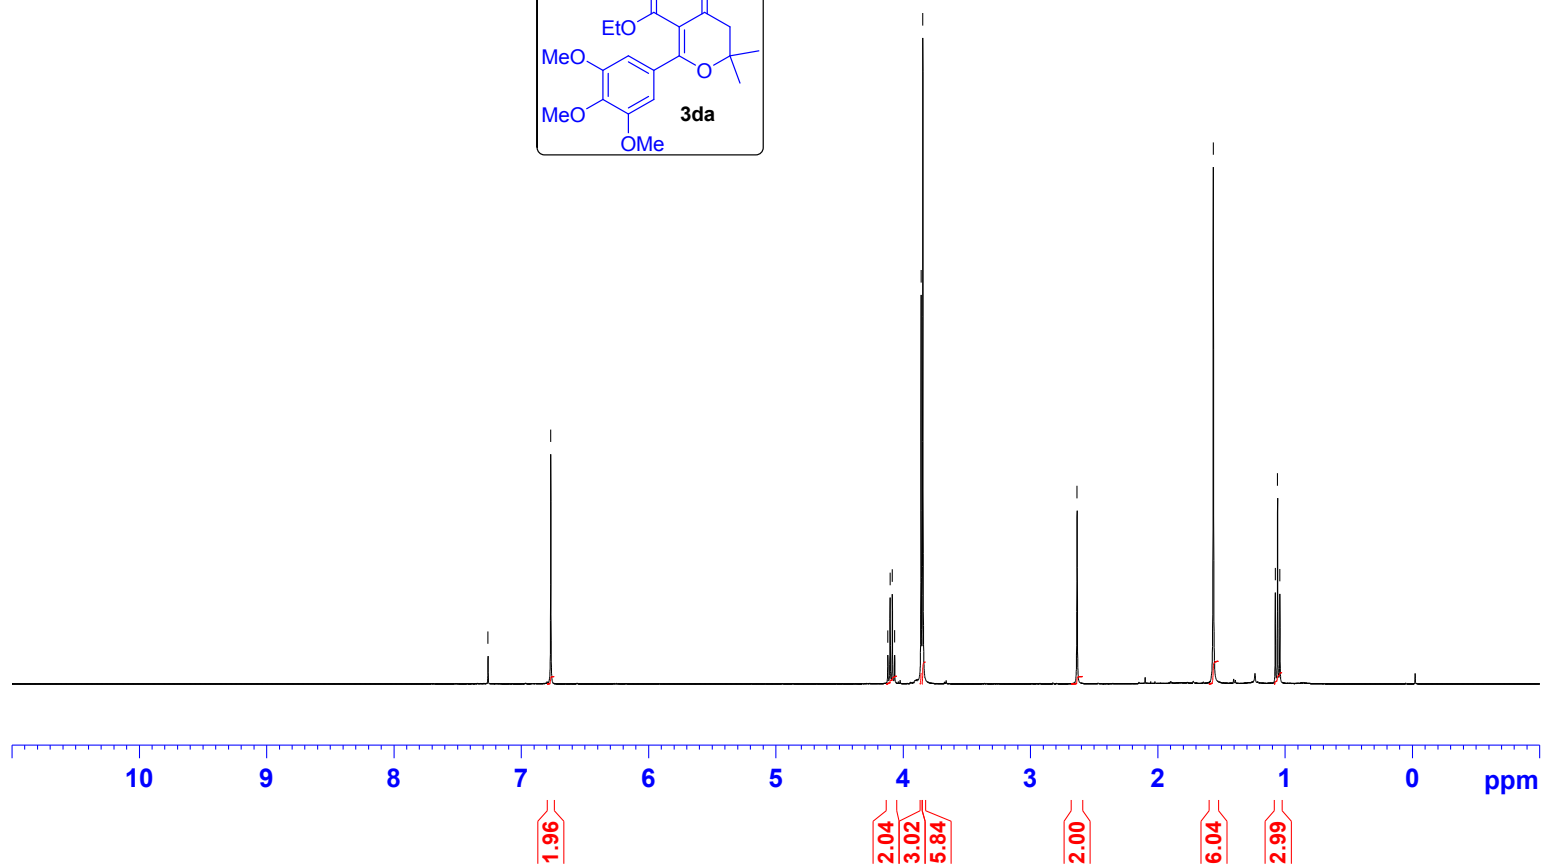

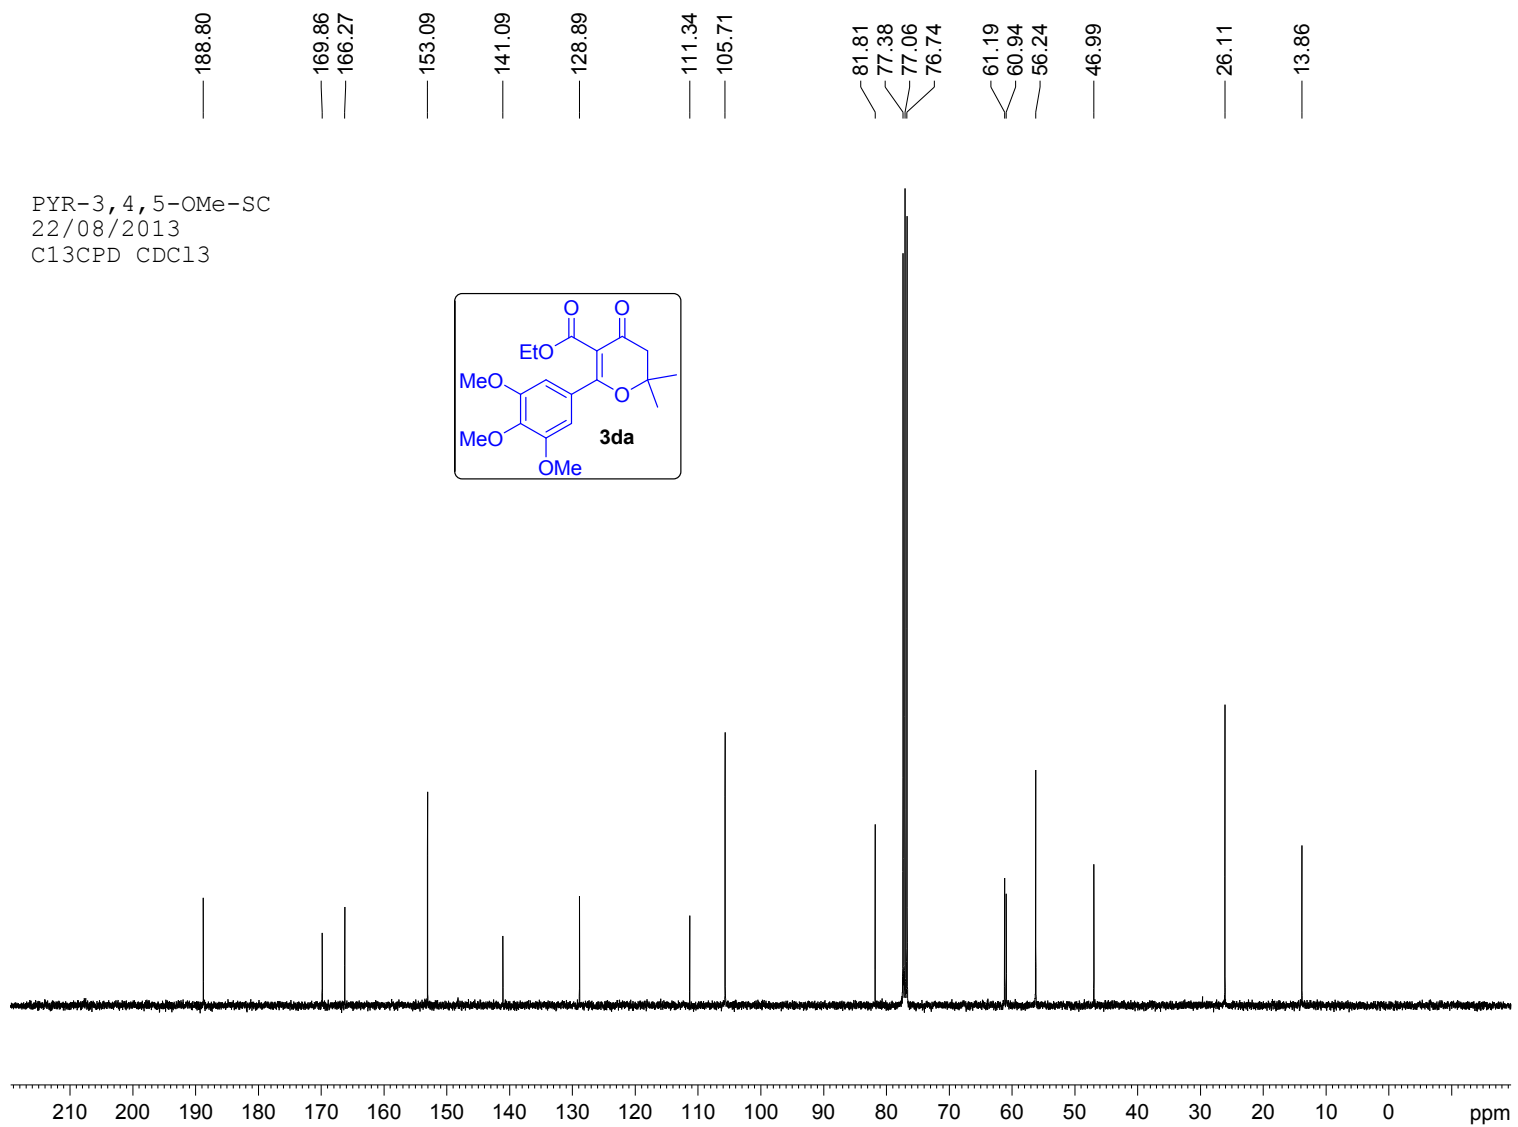

PYR-4-ClEBA-SC  
07/06/2013  
PROTON CDC13

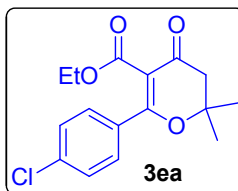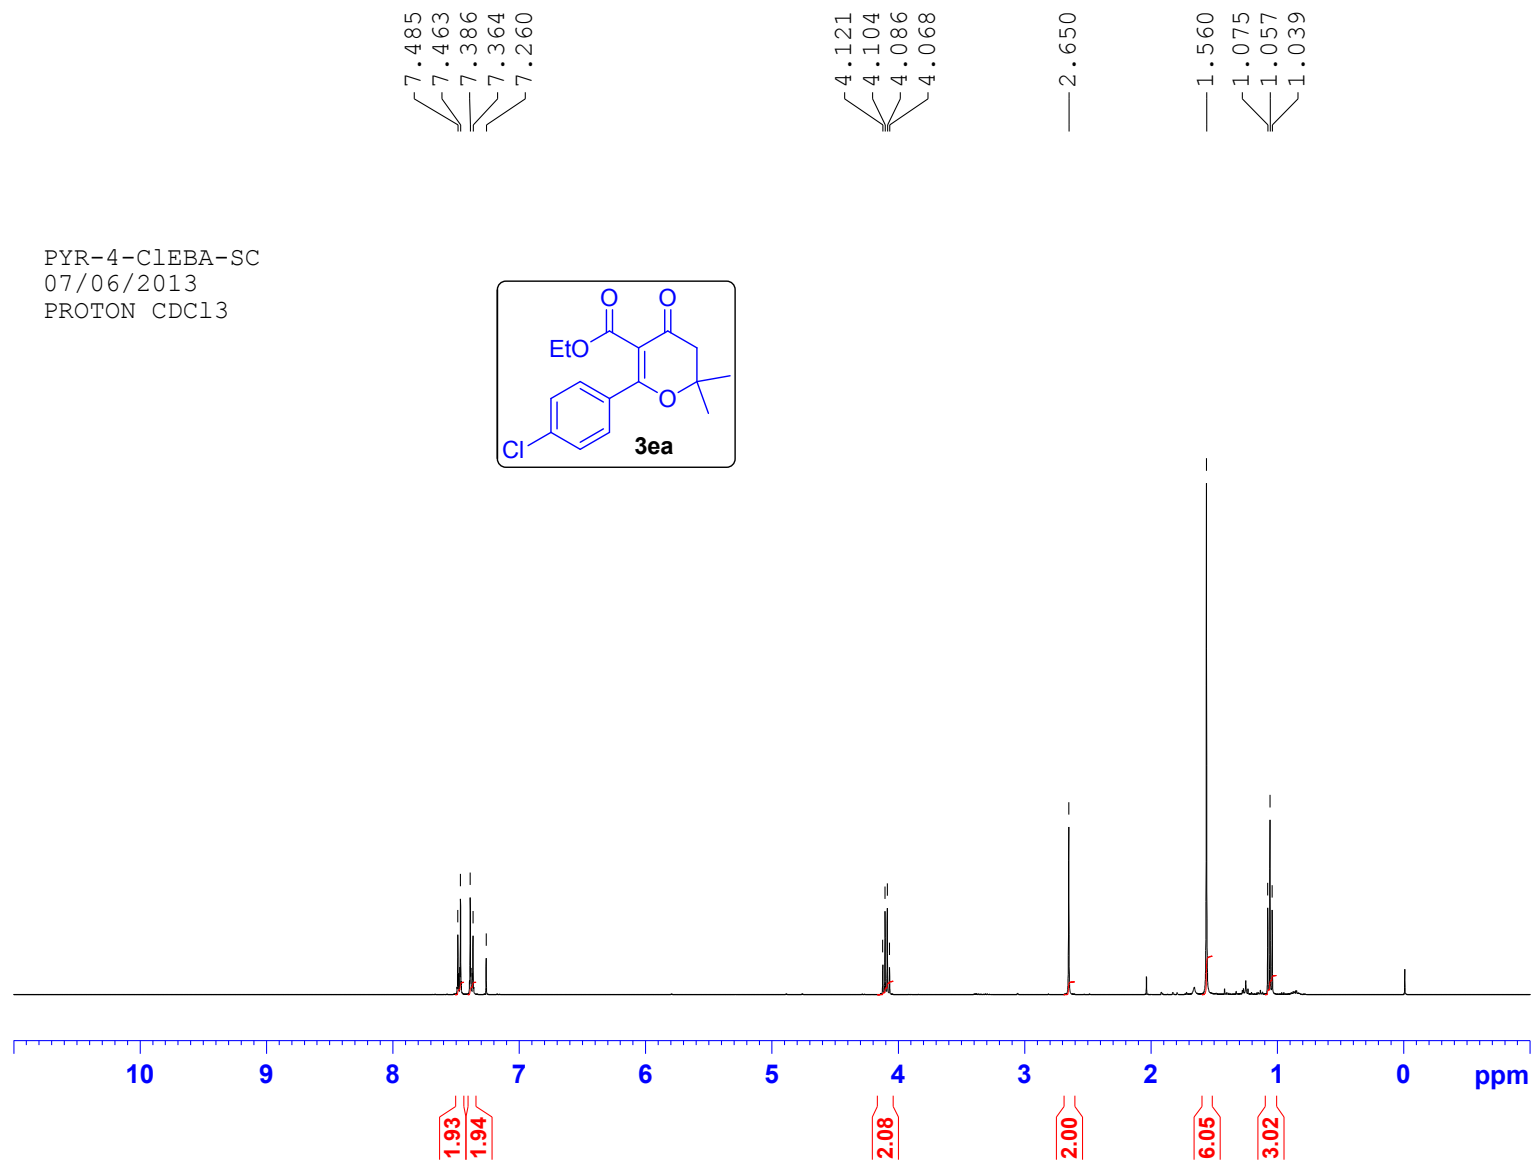

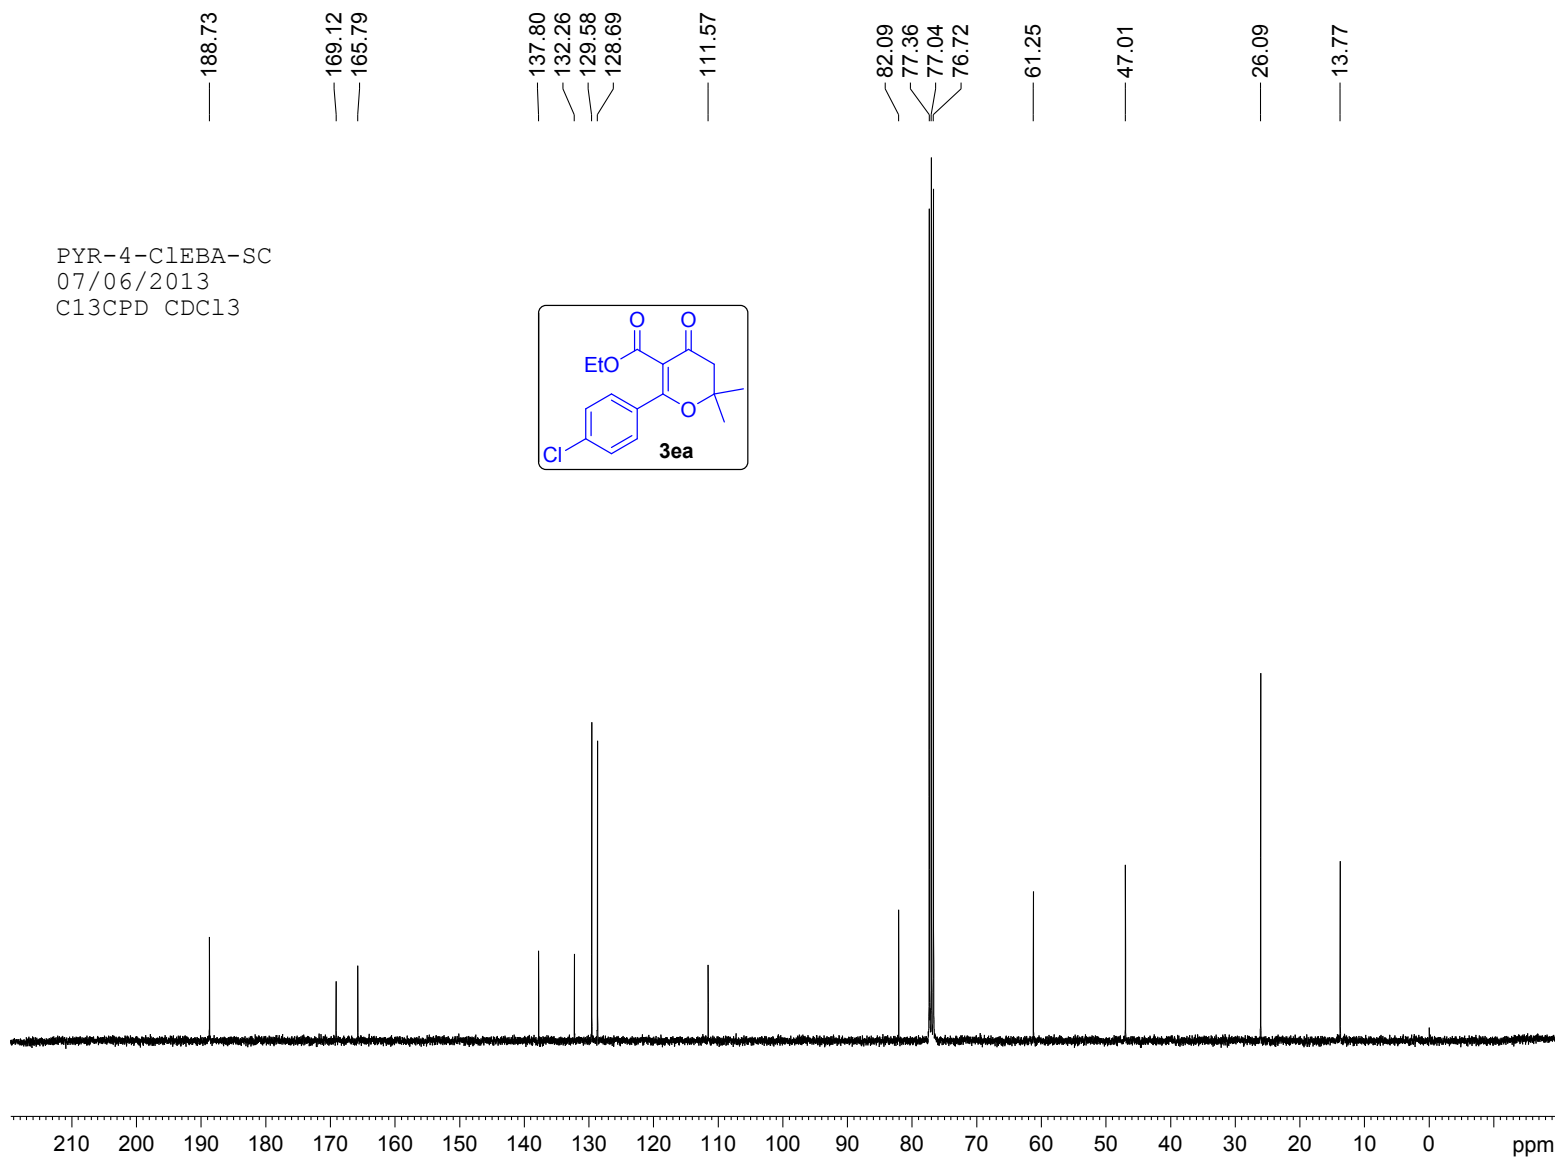

2-ClEBA ring  
24/03/2014  
PROTON CDC13

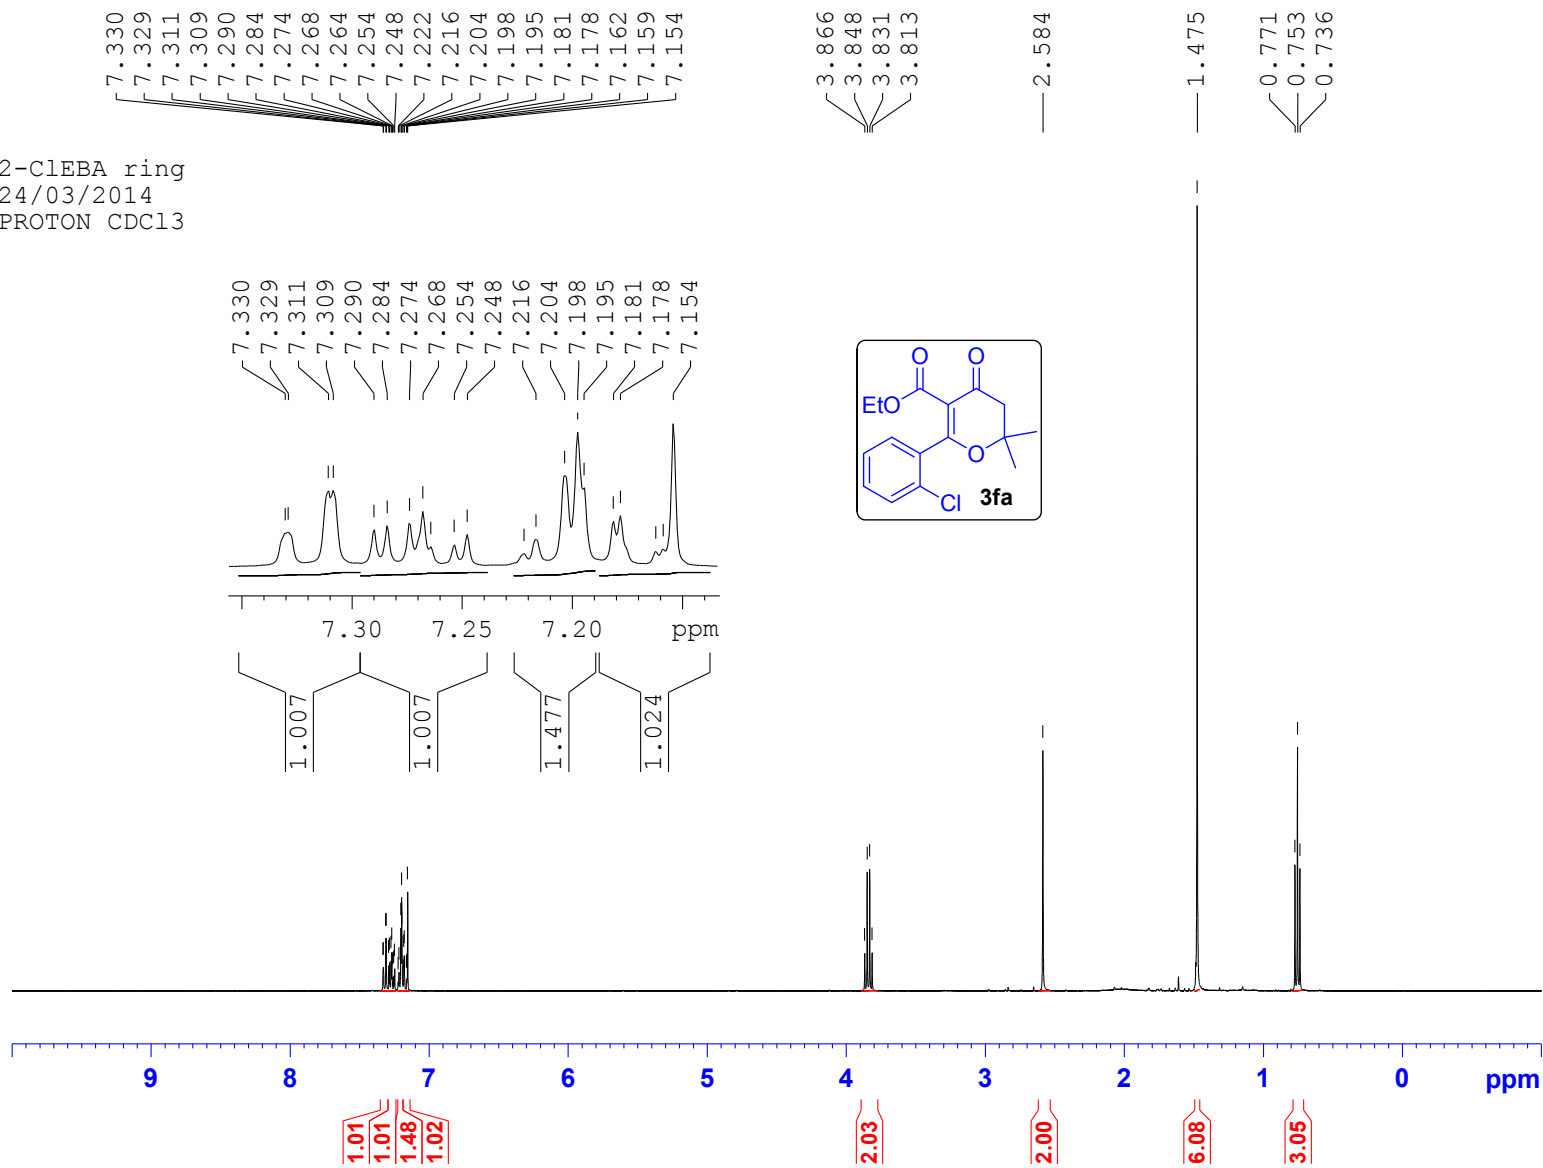



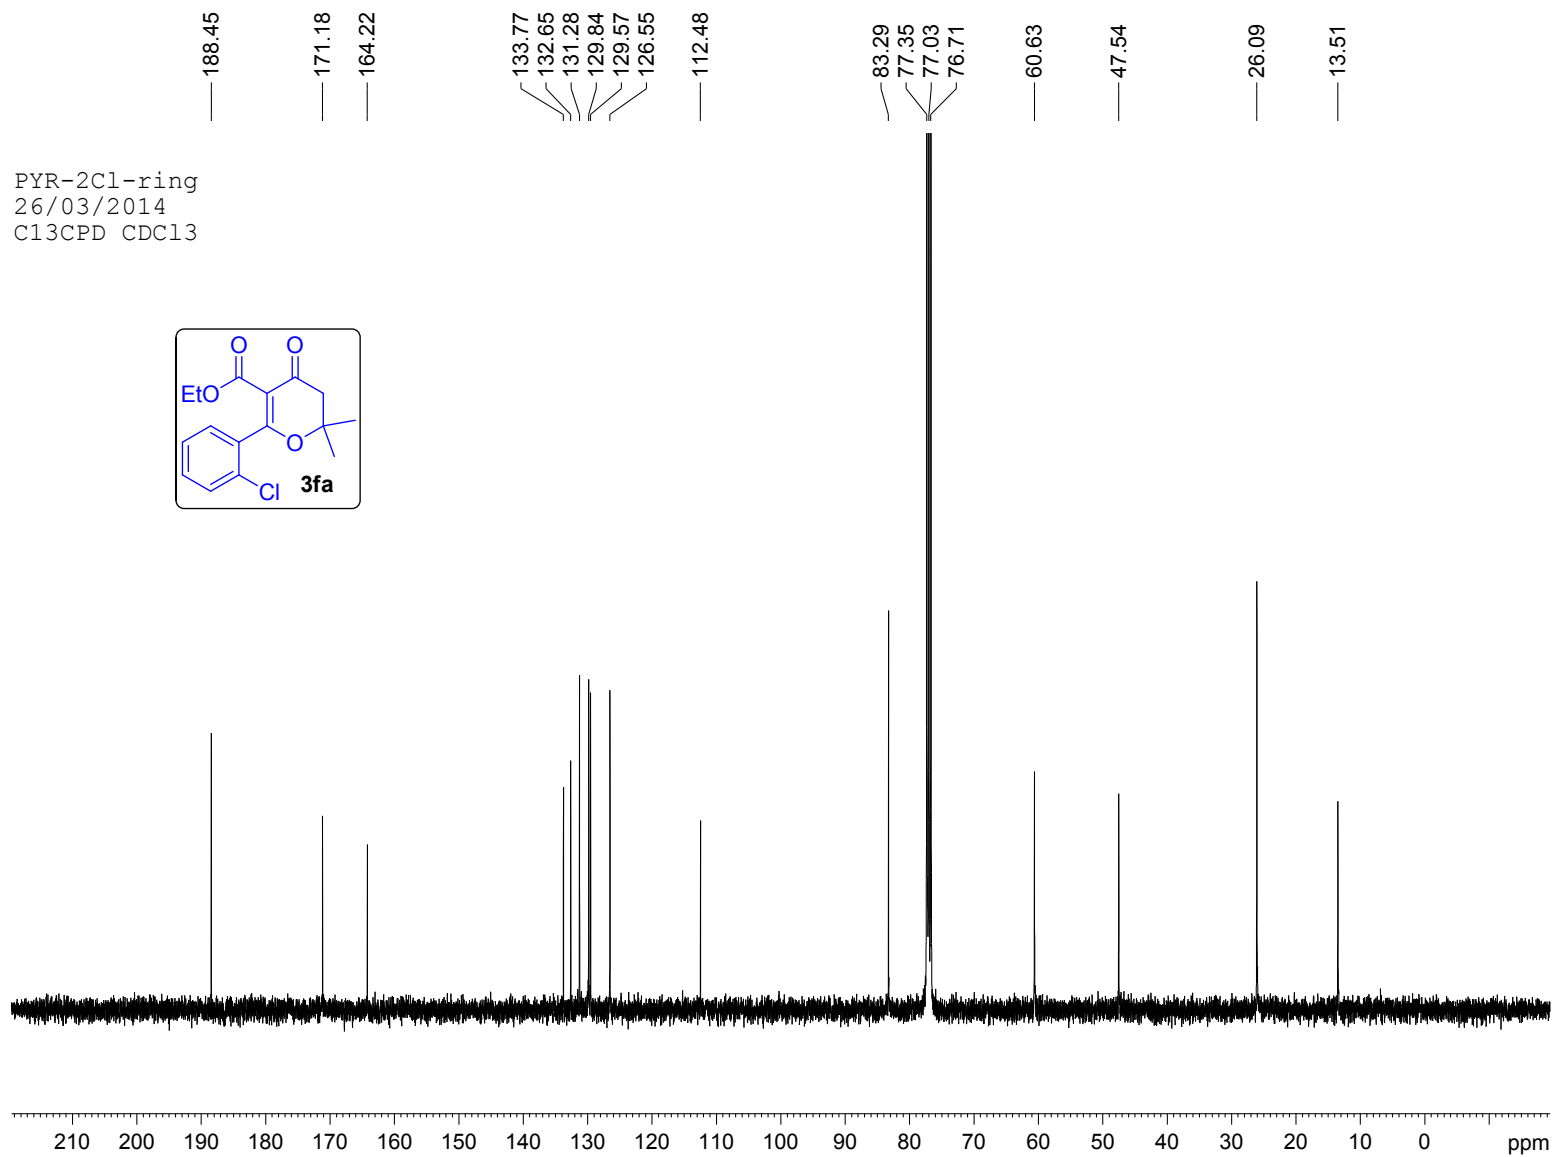

7.588  
7.585  
7.582  
7.573  
7.568  
7.564  
7.505  
7.501  
7.498  
7.489  
7.483  
7.478  
7.468  
7.464  
7.461  
7.416  
7.412  
7.400  
7.397  
7.393  
7.383  
7.379  
7.376  
7.260  
4.427  
4.411  
4.396  
4.380  
4.364  
4.137  
4.128  
4.119  
4.110  
4.107  
4.092  
4.089  
4.074  
4.072  
4.062  
4.054  
4.044  
2.520  
2.502  
2.485  
2.471  
2.454  
2.437  
1.573  
1.558  
1.180  
1.163  
1.049  
1.031  
1.013

PYR-EBA-TC-trans  
23/01/2012  
PROTON CDC13

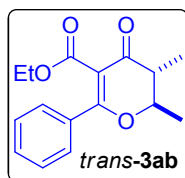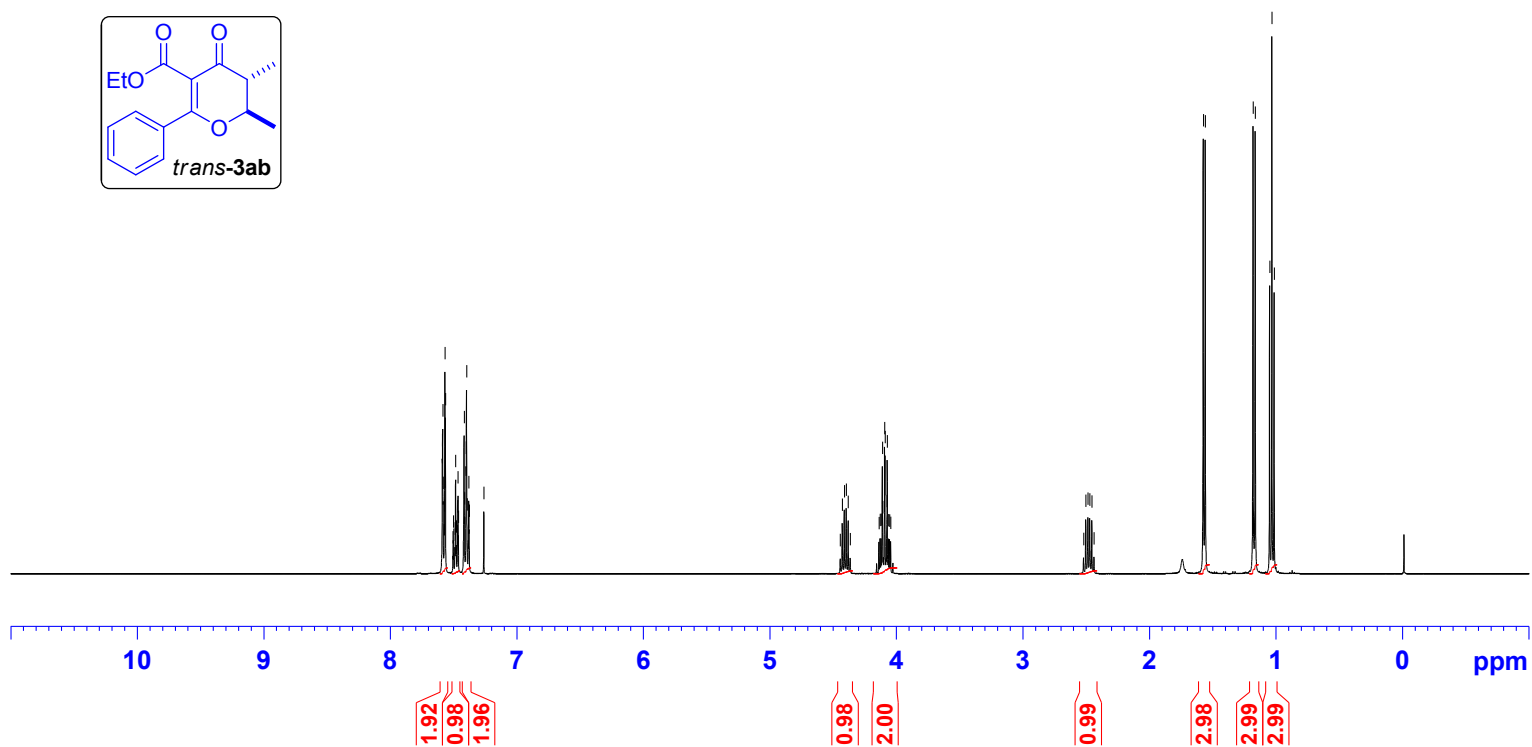

— 191.34  
— 171.42  
— 166.20  
  
133.24  
131.75  
128.43  
128.30  
— 111.79  
  
80.86  
77.40  
77.08  
76.76  
— 61.17  
— 44.48  
  
— 19.14  
— 13.74  
— 10.02

PYR-EBA-TC-trans  
23/01/2012  
C13CPD CDCl3

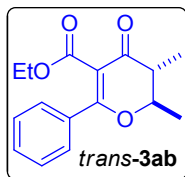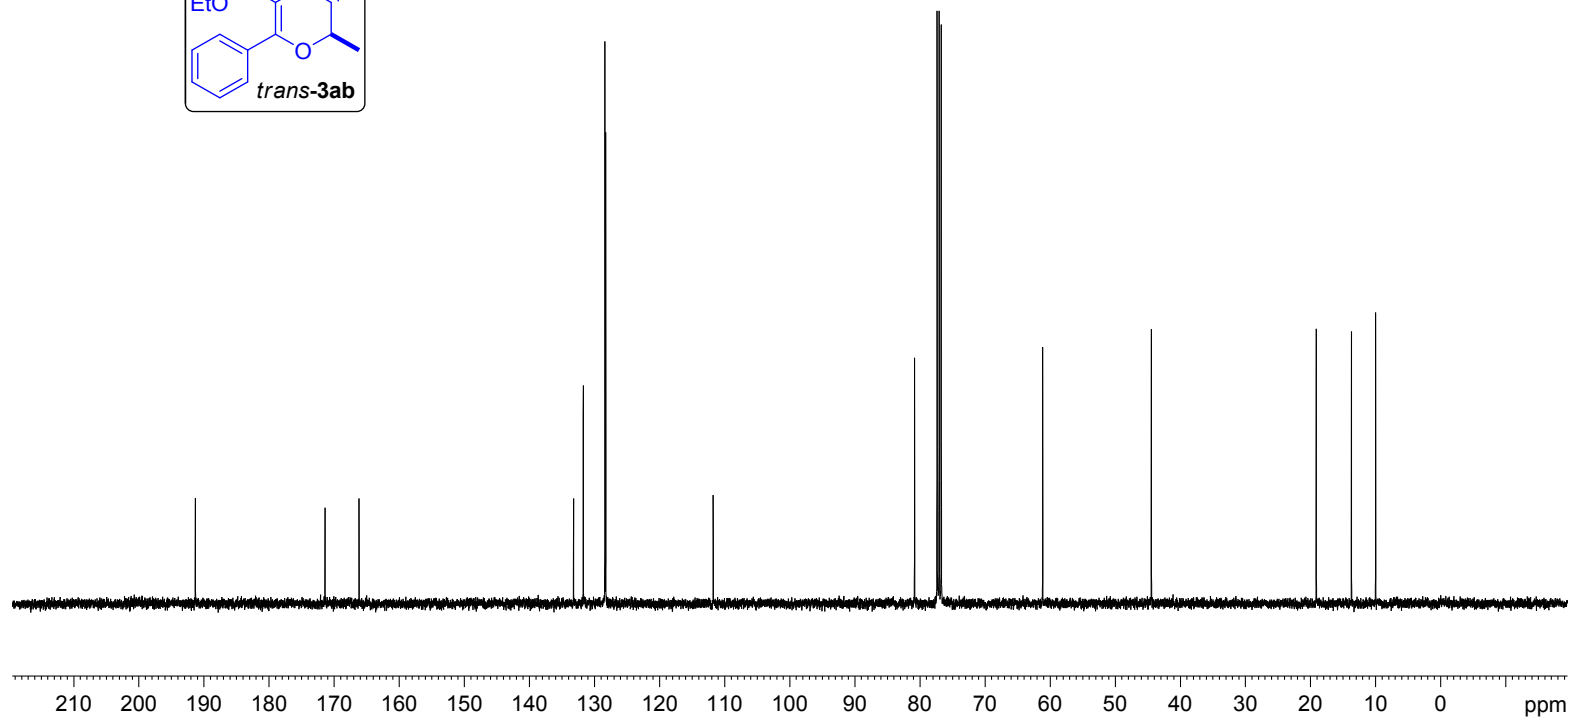

7.581  
7.578  
7.574  
7.565  
7.560  
7.557  
7.504  
7.501  
7.498  
7.488  
7.483  
7.477  
7.468  
7.464  
7.461  
7.418  
7.413  
7.410  
7.397  
7.394  
7.390  
7.380  
7.376  
7.373  
7.260  
4.824  
4.816  
4.808  
4.799  
4.120  
4.111  
4.102  
4.093  
4.084  
4.075  
4.066  
4.057  
4.048  
4.039  
4.030  
4.021  
2.545  
2.536  
2.527  
2.518  
2.508  
2.500  
1.480  
1.463  
1.172  
1.154  
1.015  
0.998  
0.980

PYR-EBA-TC-Cis  
07/02/2012  
PROTON CDC13

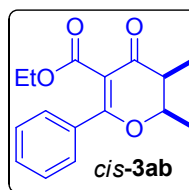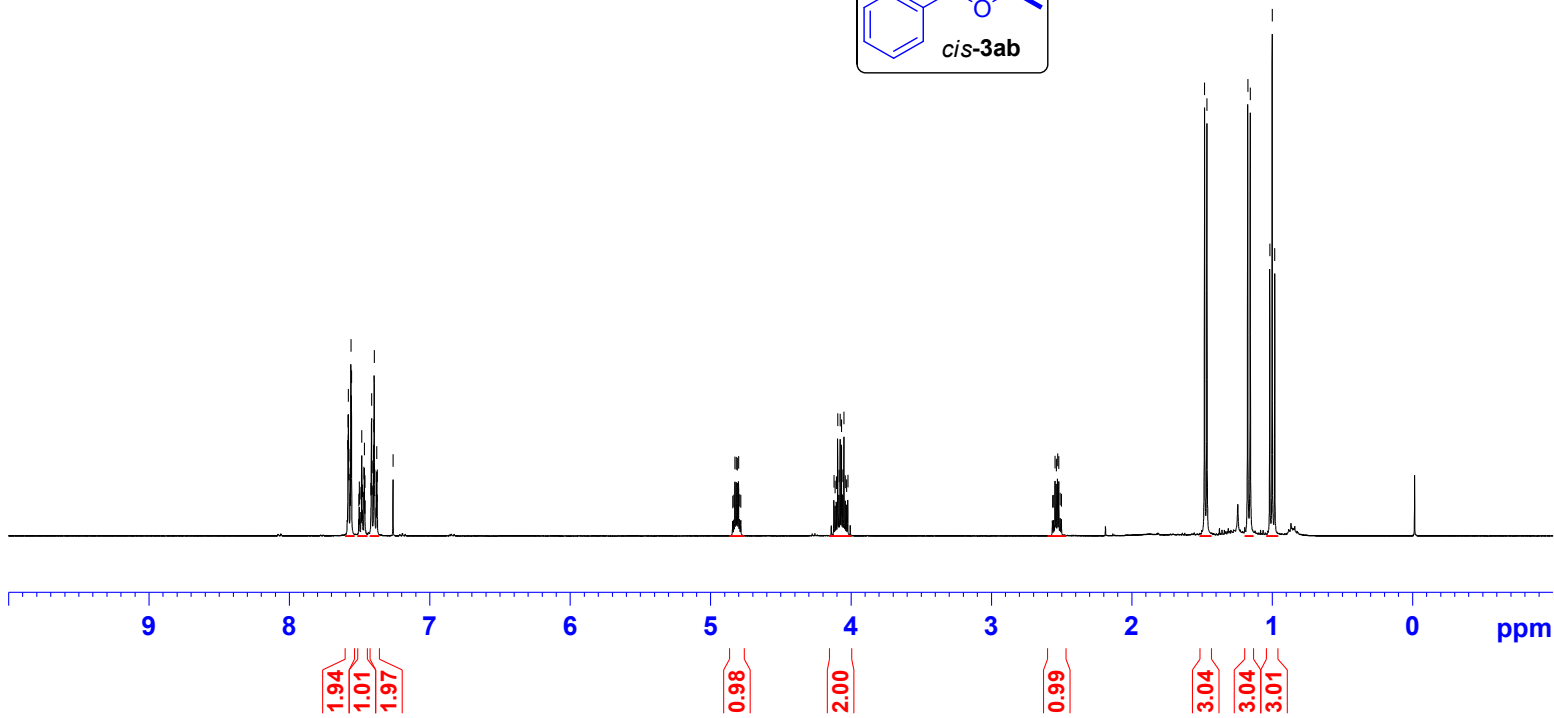

— 193.21

— 171.67

— 166.12

— 133.23

— 131.78

— 128.41

— 128.34

— 110.98

— 78.47

— 77.40

— 77.08

— 76.77

— 61.14

— 43.41

— 15.67

— 13.68

— 8.94

PYR-EBA-TC-Cis  
07/02/2012  
C13CPD CDC13

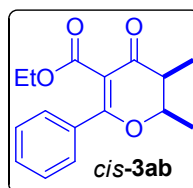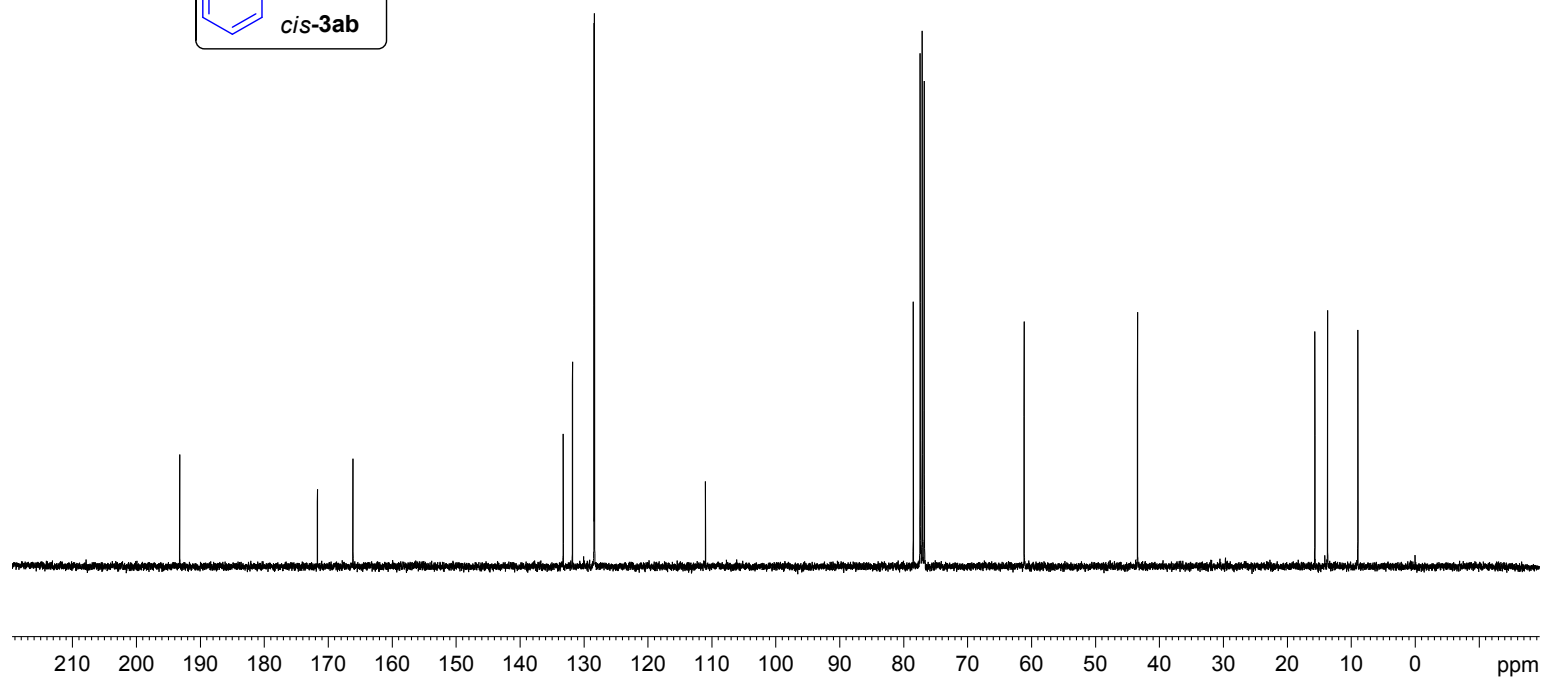

7.592  
7.589  
7.586  
7.577  
7.572  
7.568  
7.518  
7.505  
7.499  
7.494  
7.484  
7.481  
7.477  
7.433  
7.428  
7.425  
7.412  
7.409  
7.405  
7.395  
7.391  
7.388  
7.260  
4.816  
4.804  
4.800  
4.788  
4.787  
4.774  
4.771  
4.759  
4.137  
4.128  
4.119  
4.110  
4.097  
4.092  
4.079  
4.074  
4.061  
4.052  
4.043  
4.034  
2.677  
2.635  
2.610  
2.606  
2.598  
2.568  
1.586  
1.570  
1.031  
1.013  
0.995

PYREBA-CRA  
21/02/11  
PROTON CDC13

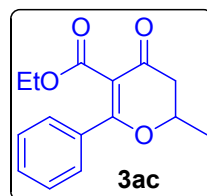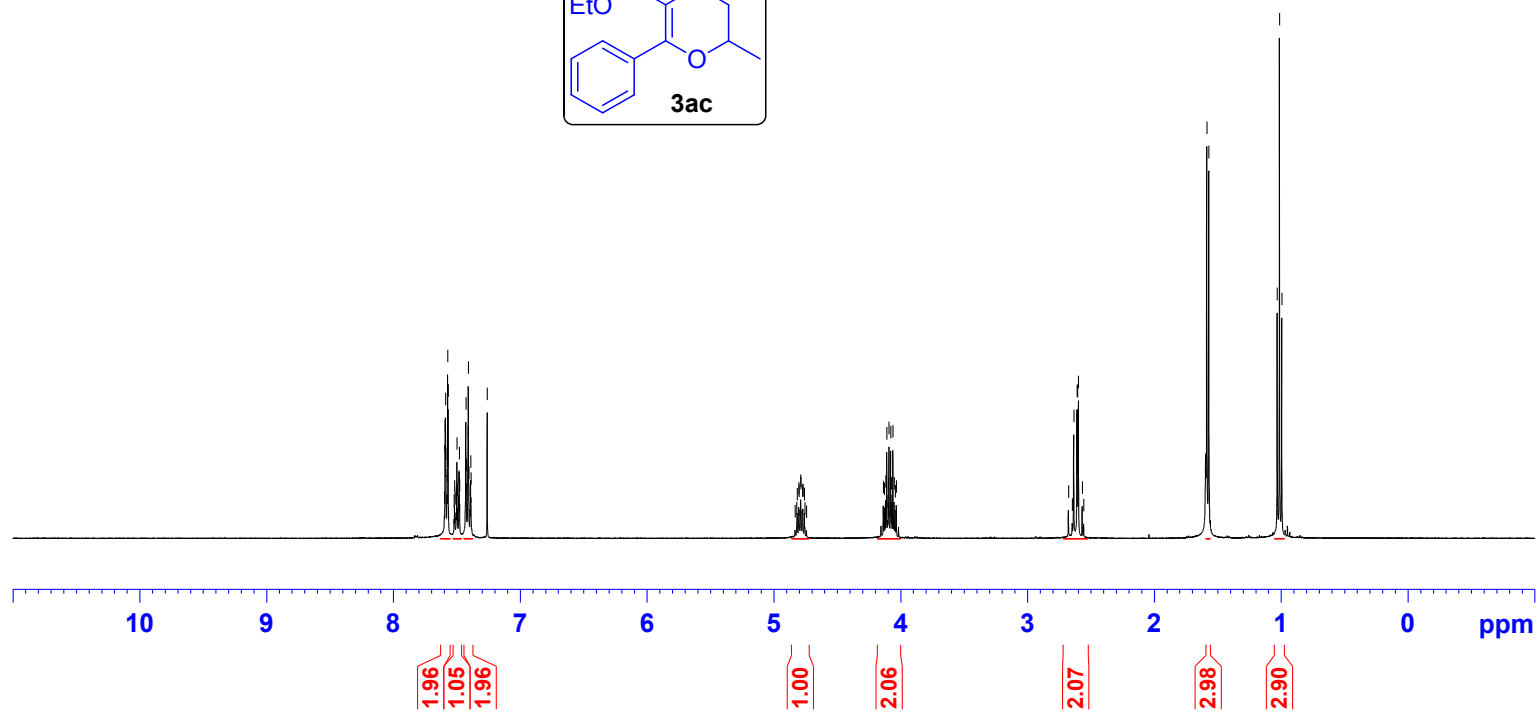

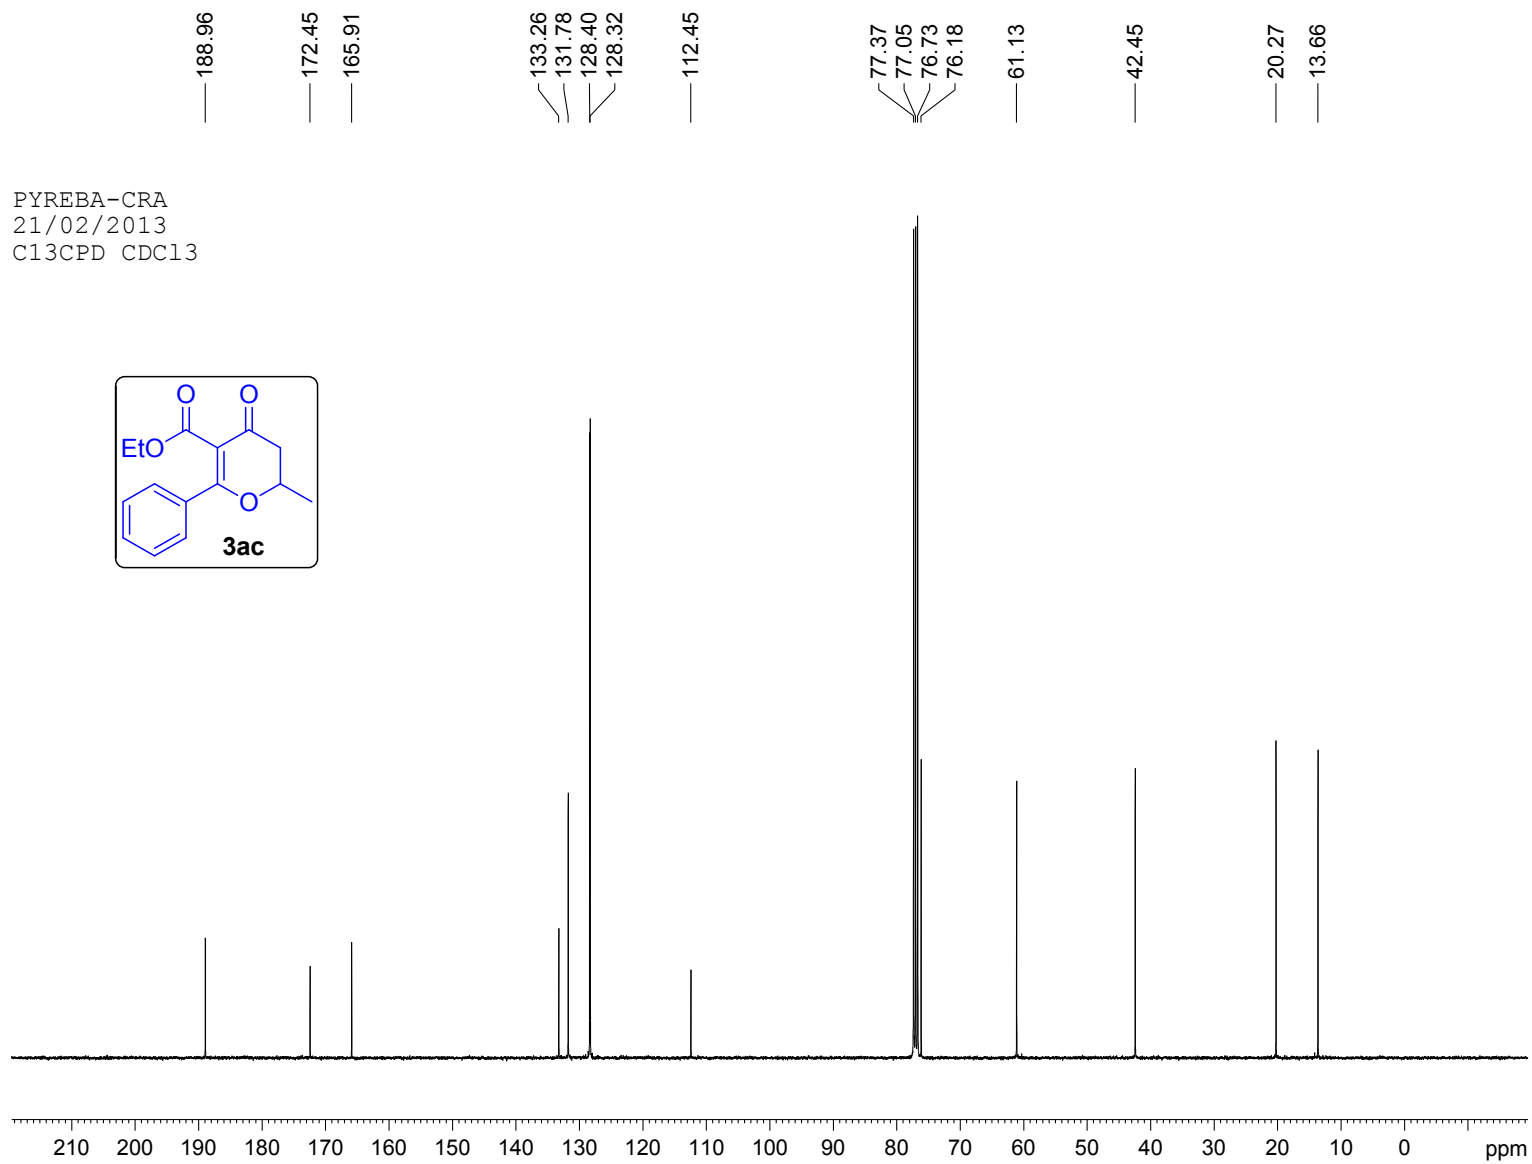

PYR-2-TP-SC  
28/01/2013  
PROTON CDC13

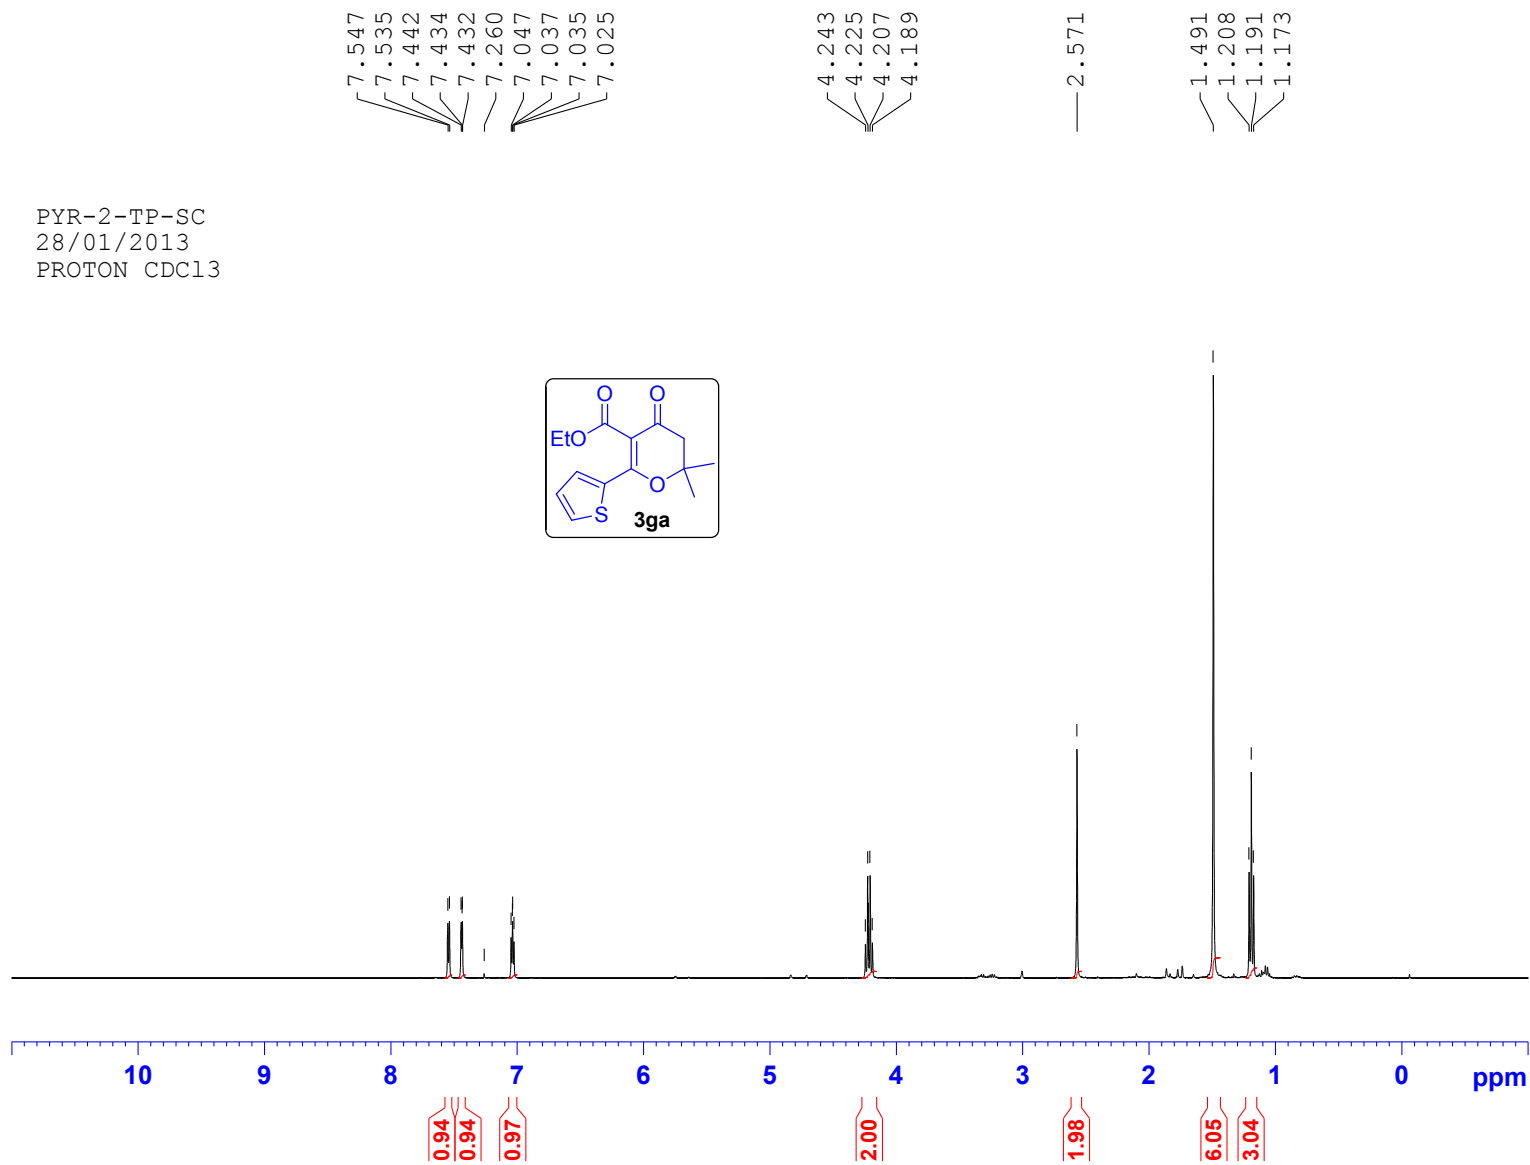



— 188.82  
— 166.23  
— 161.51  
— 135.36  
— 131.70  
— 131.06  
— 128.03  
— 109.92  
— 81.80  
— 77.52  
— 77.20  
— 76.88  
— 61.61  
— 46.91  
— 26.02  
— 13.89

PYR-2-TP-SC  
28/01/2013  
C13CPD CDC13

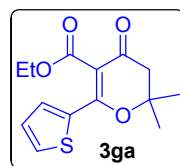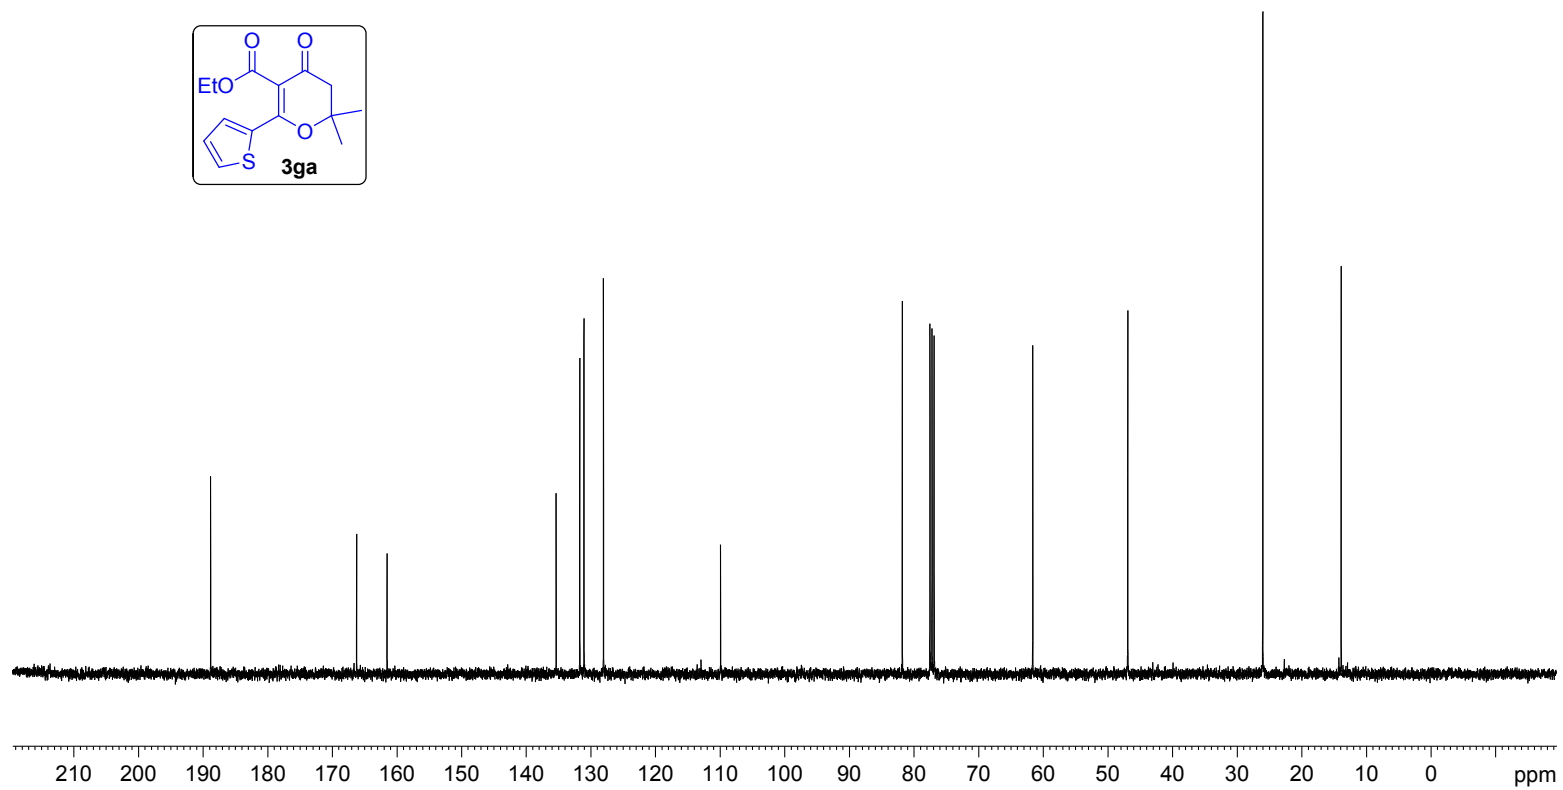

PYR-2-Fur-SC  
08/06/2013  
PROTON CDC13

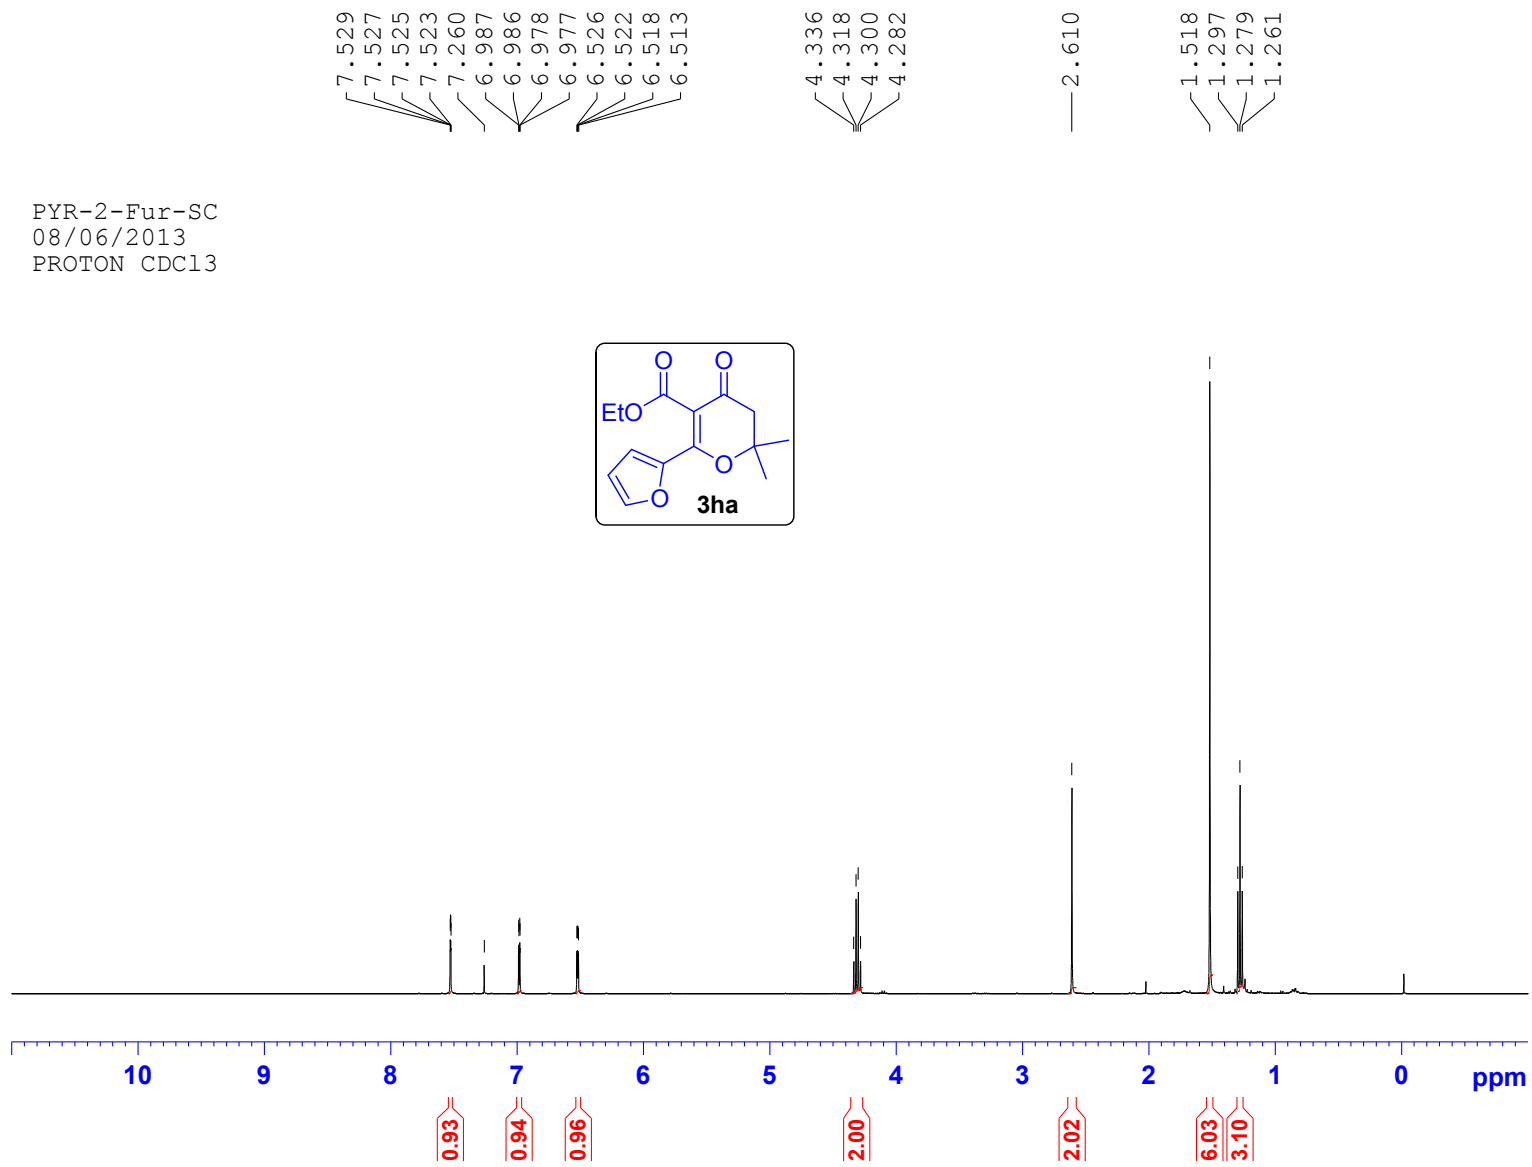

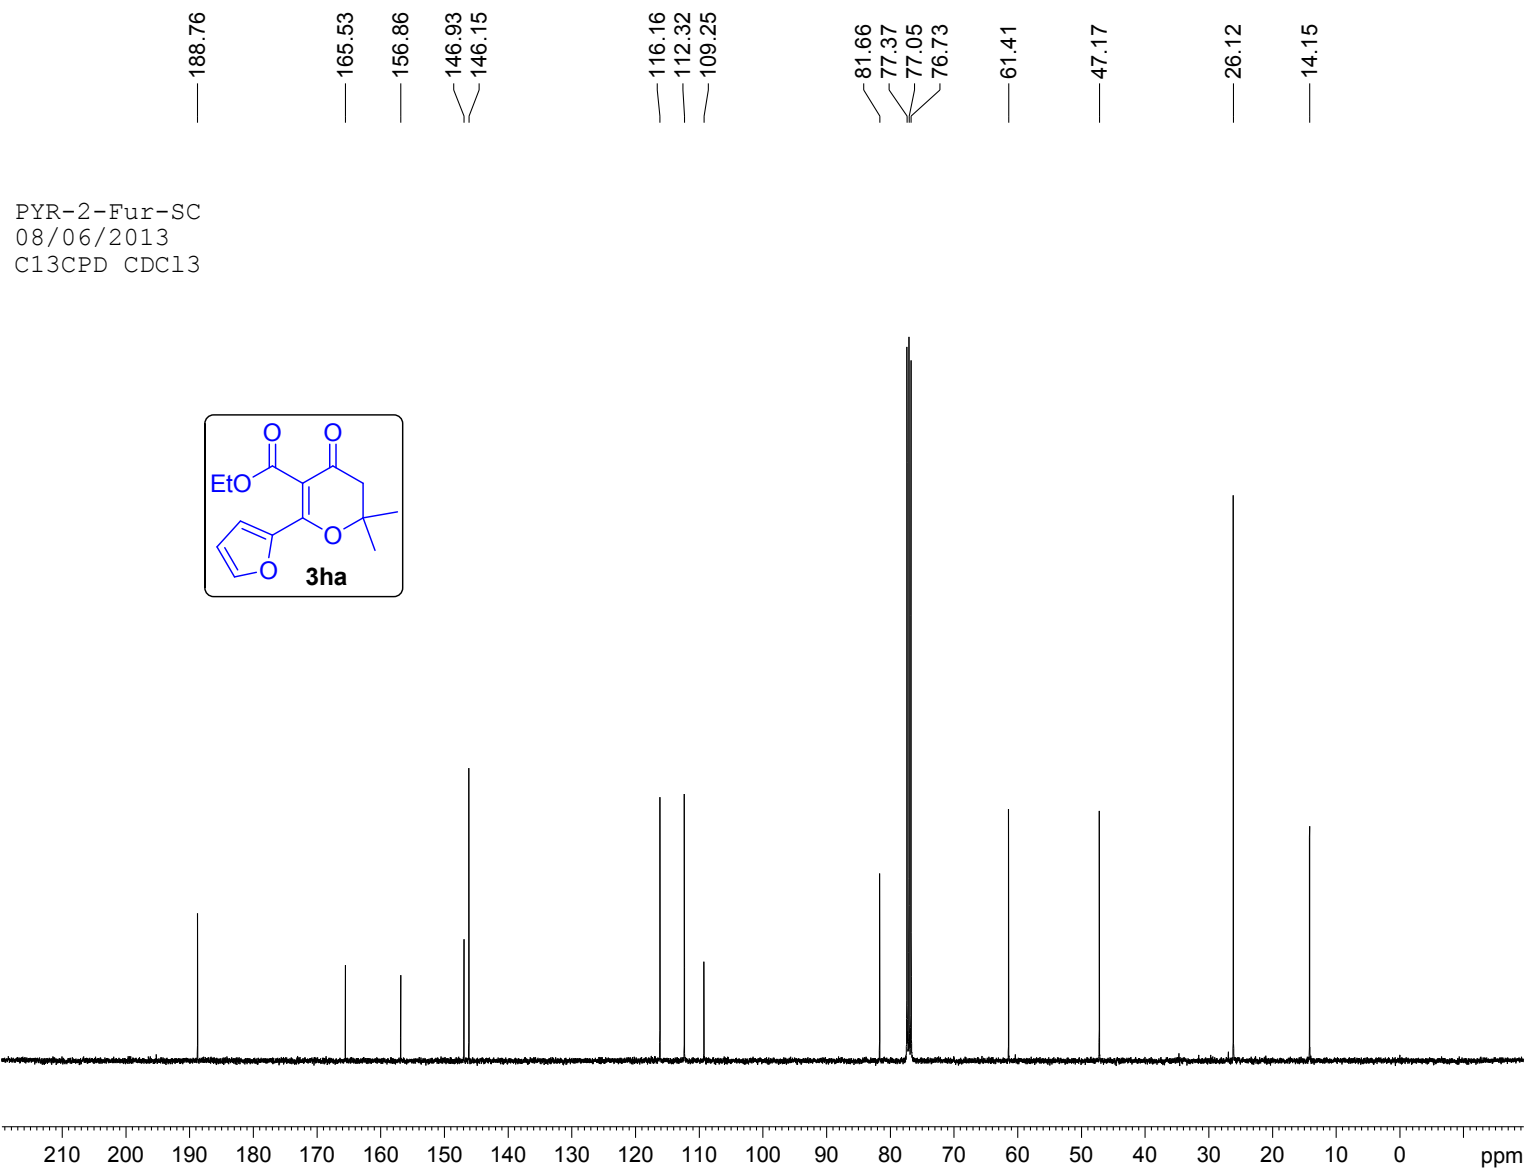

PYR-EAA-SC  
16/09/2013  
PROTON CDC13

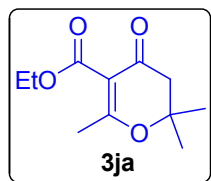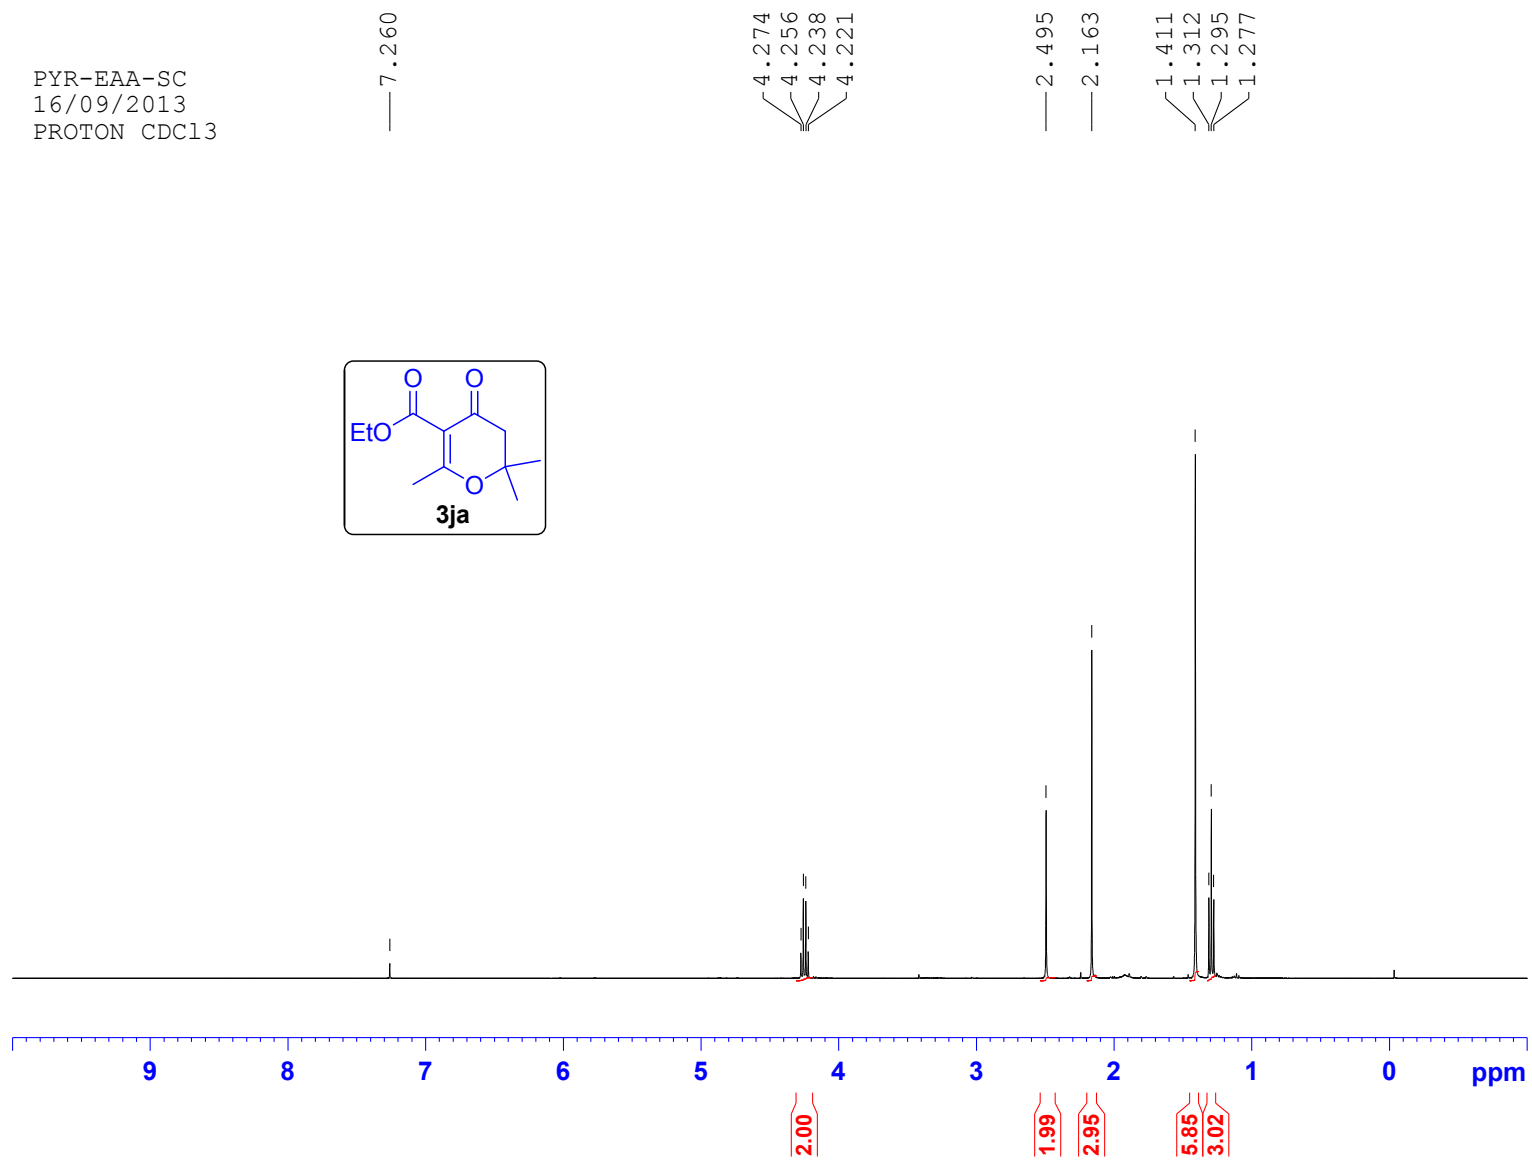

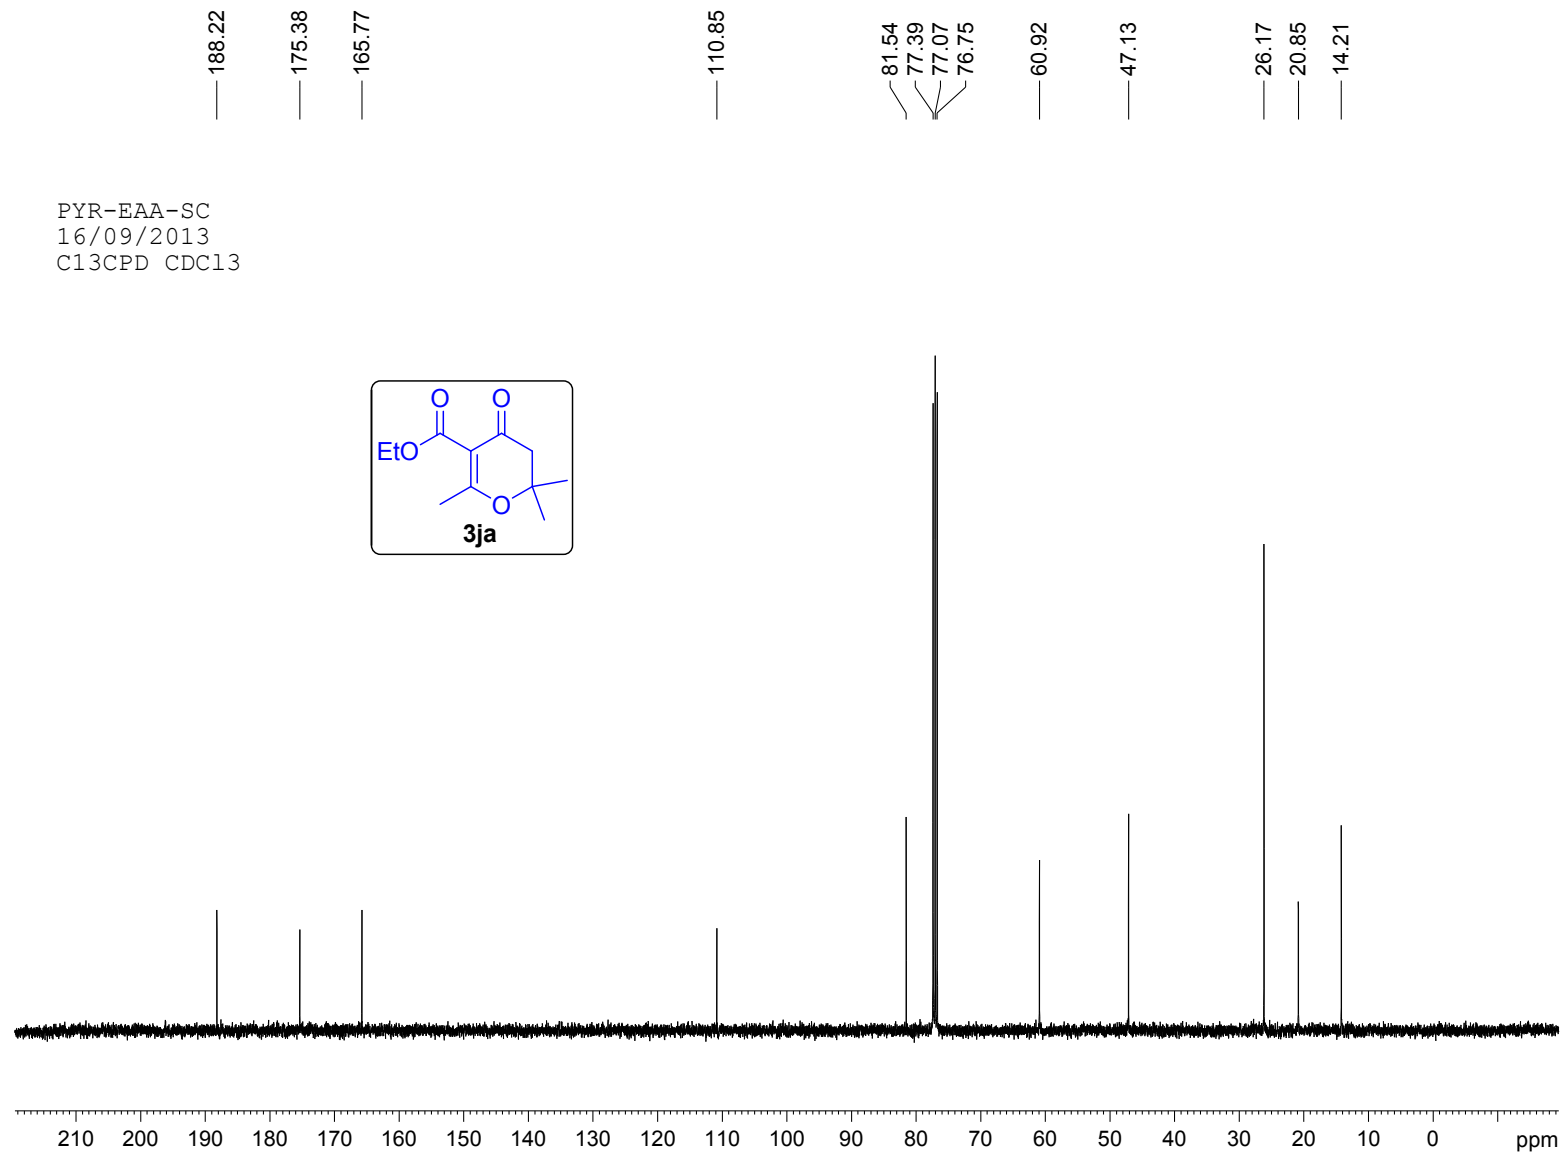

PYREAA-CRA  
01/3/11  
PROTON CDC13

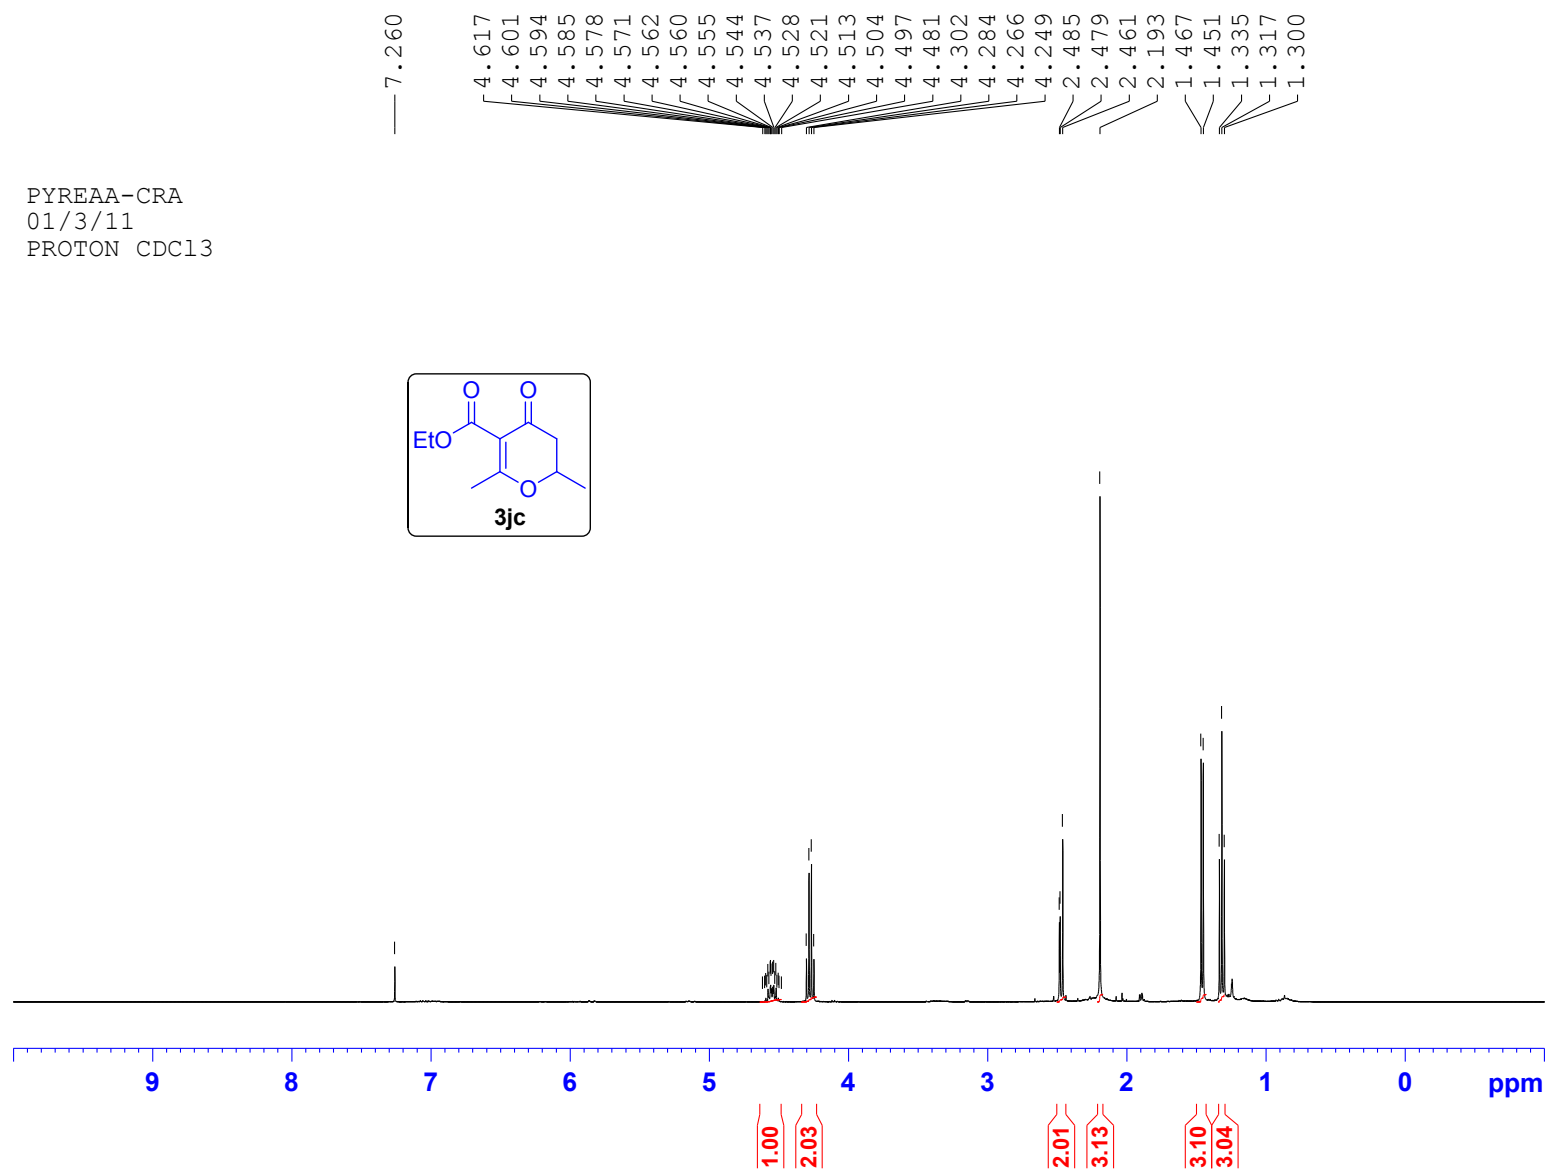

PYREAA-CRA  
05/05/2012  
C13CPD CDC13

162.27  
161.39  
155.31  
152.62

125.47  
113.40  
112.68  
111.79  
101.35

77.39  
77.07  
76.75  
68.62

28.70  
28.11  
22.42  
18.66  
13.99

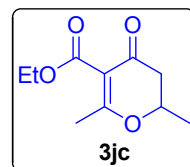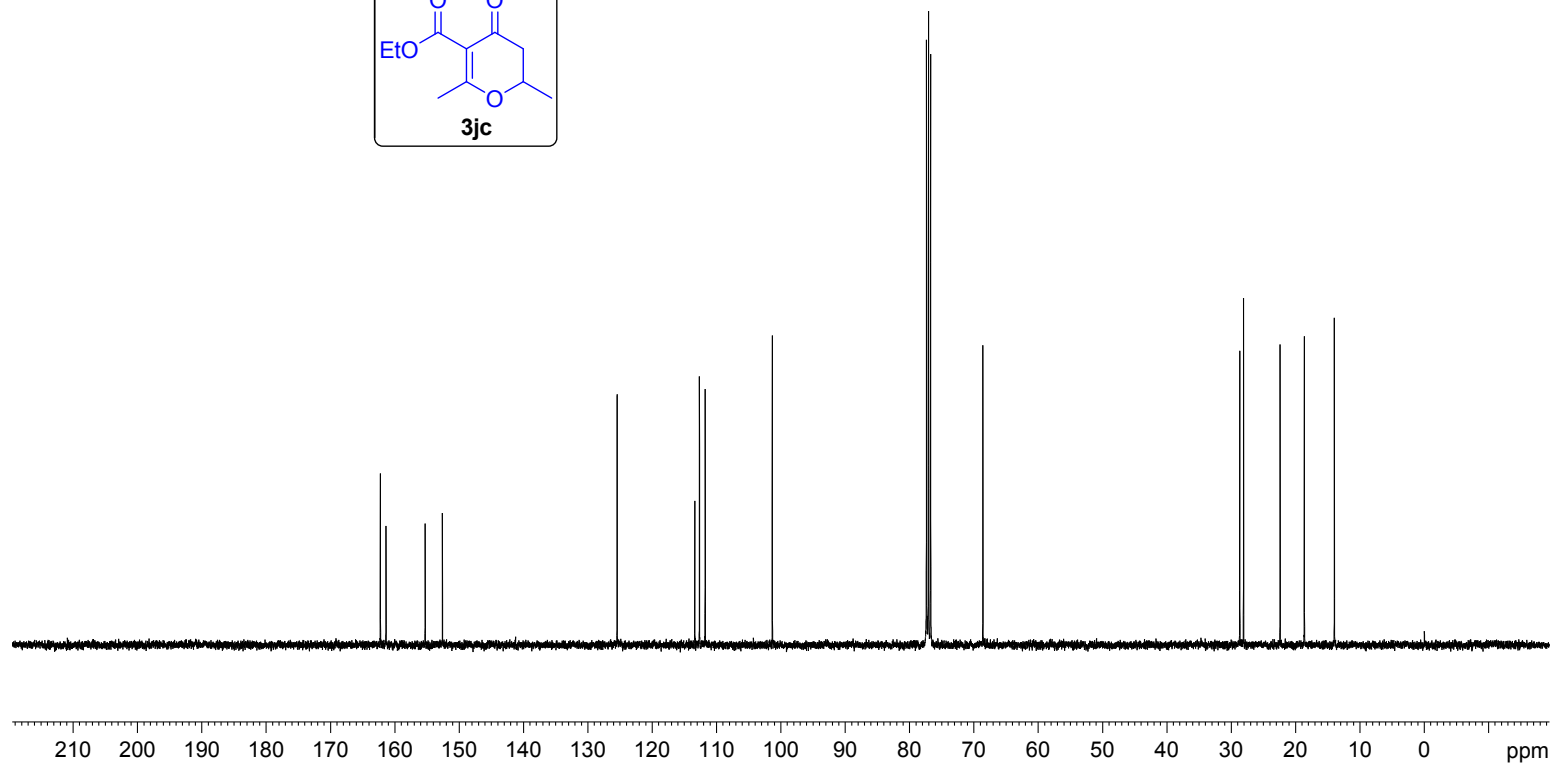

PYR-M3OPSC  
12/01/2012  
PROTON CDC13

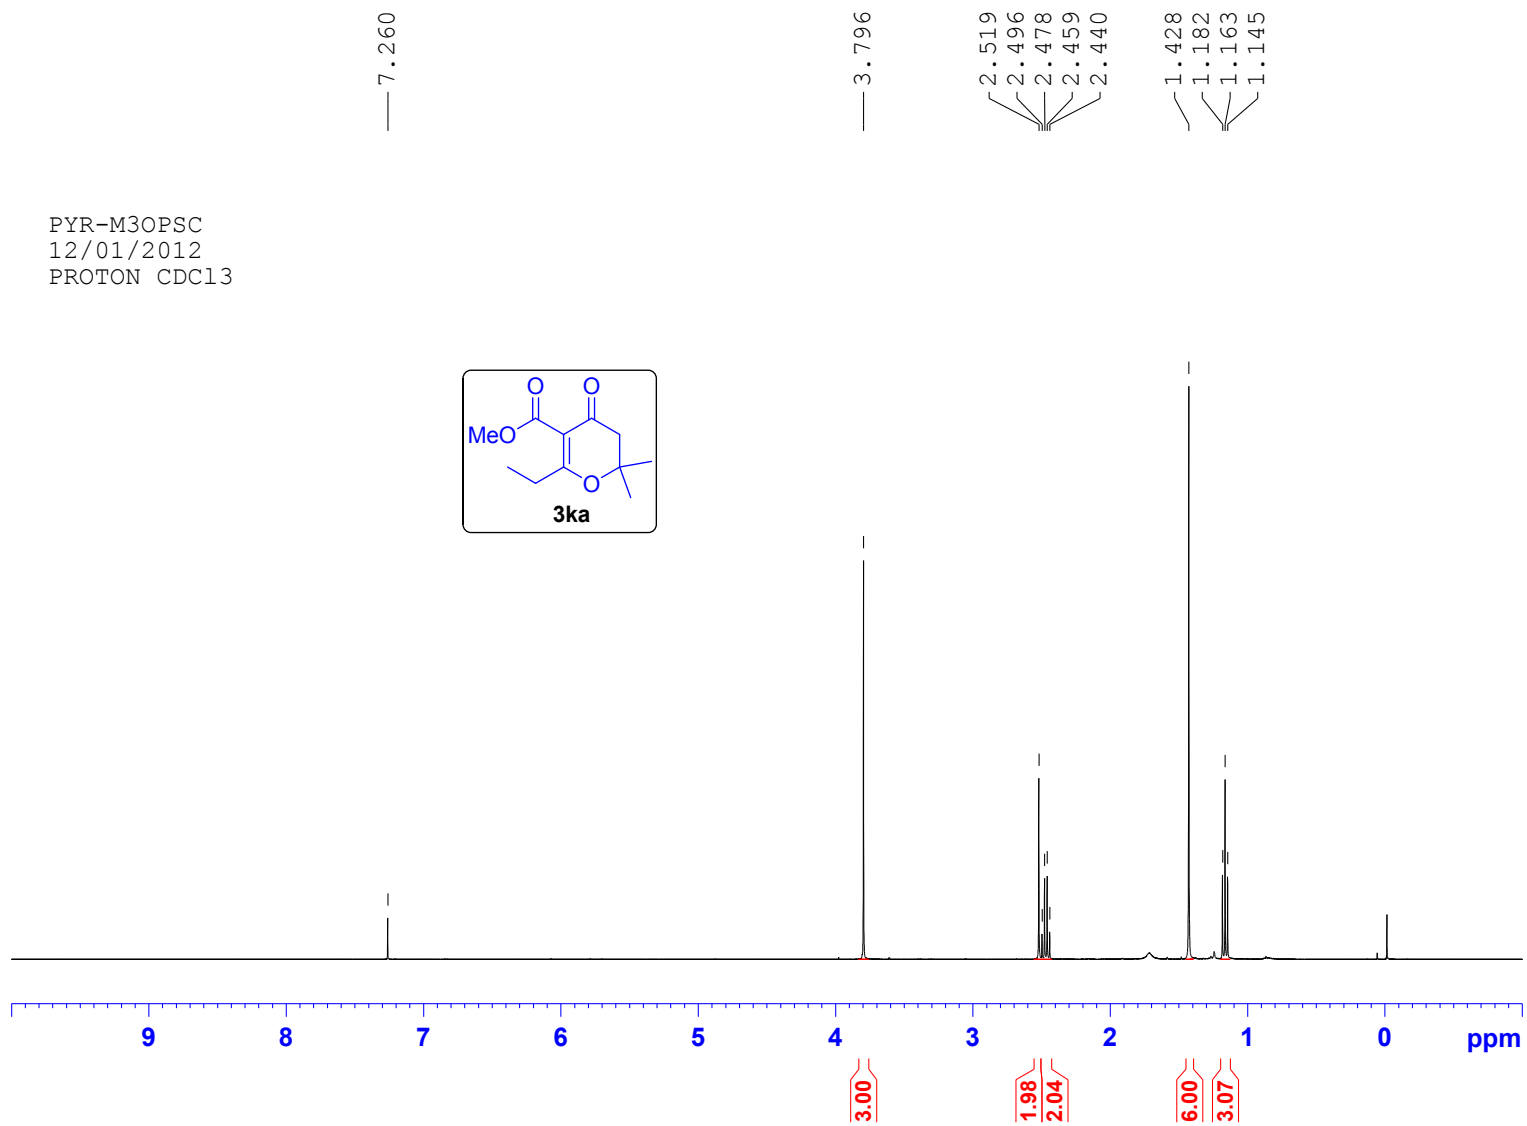



— 188.65  
— 179.53  
— 166.27  
  
— 109.92  
  
81.38  
77.42  
77.10  
76.78  
  
— 52.04  
— 47.06  
  
27.50  
26.05  
  
— 11.19

PYR-M3OP-SC  
23/01/2012  
C13CPD CDC13

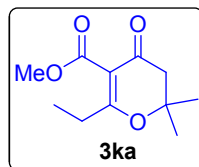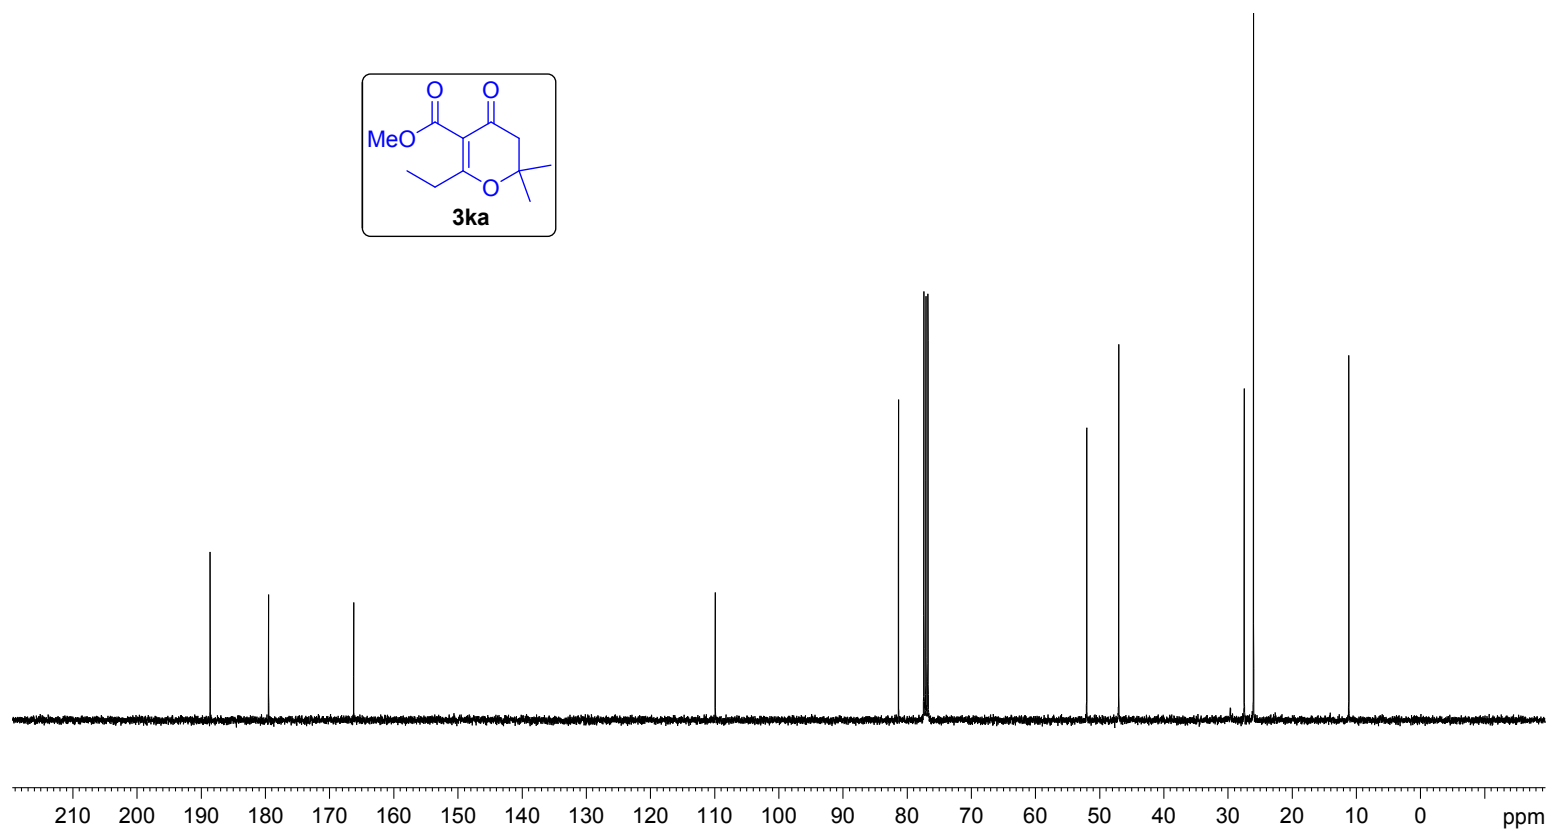

Pyr-M3OPTC-trans  
11/01/2012  
PROTON CDC13

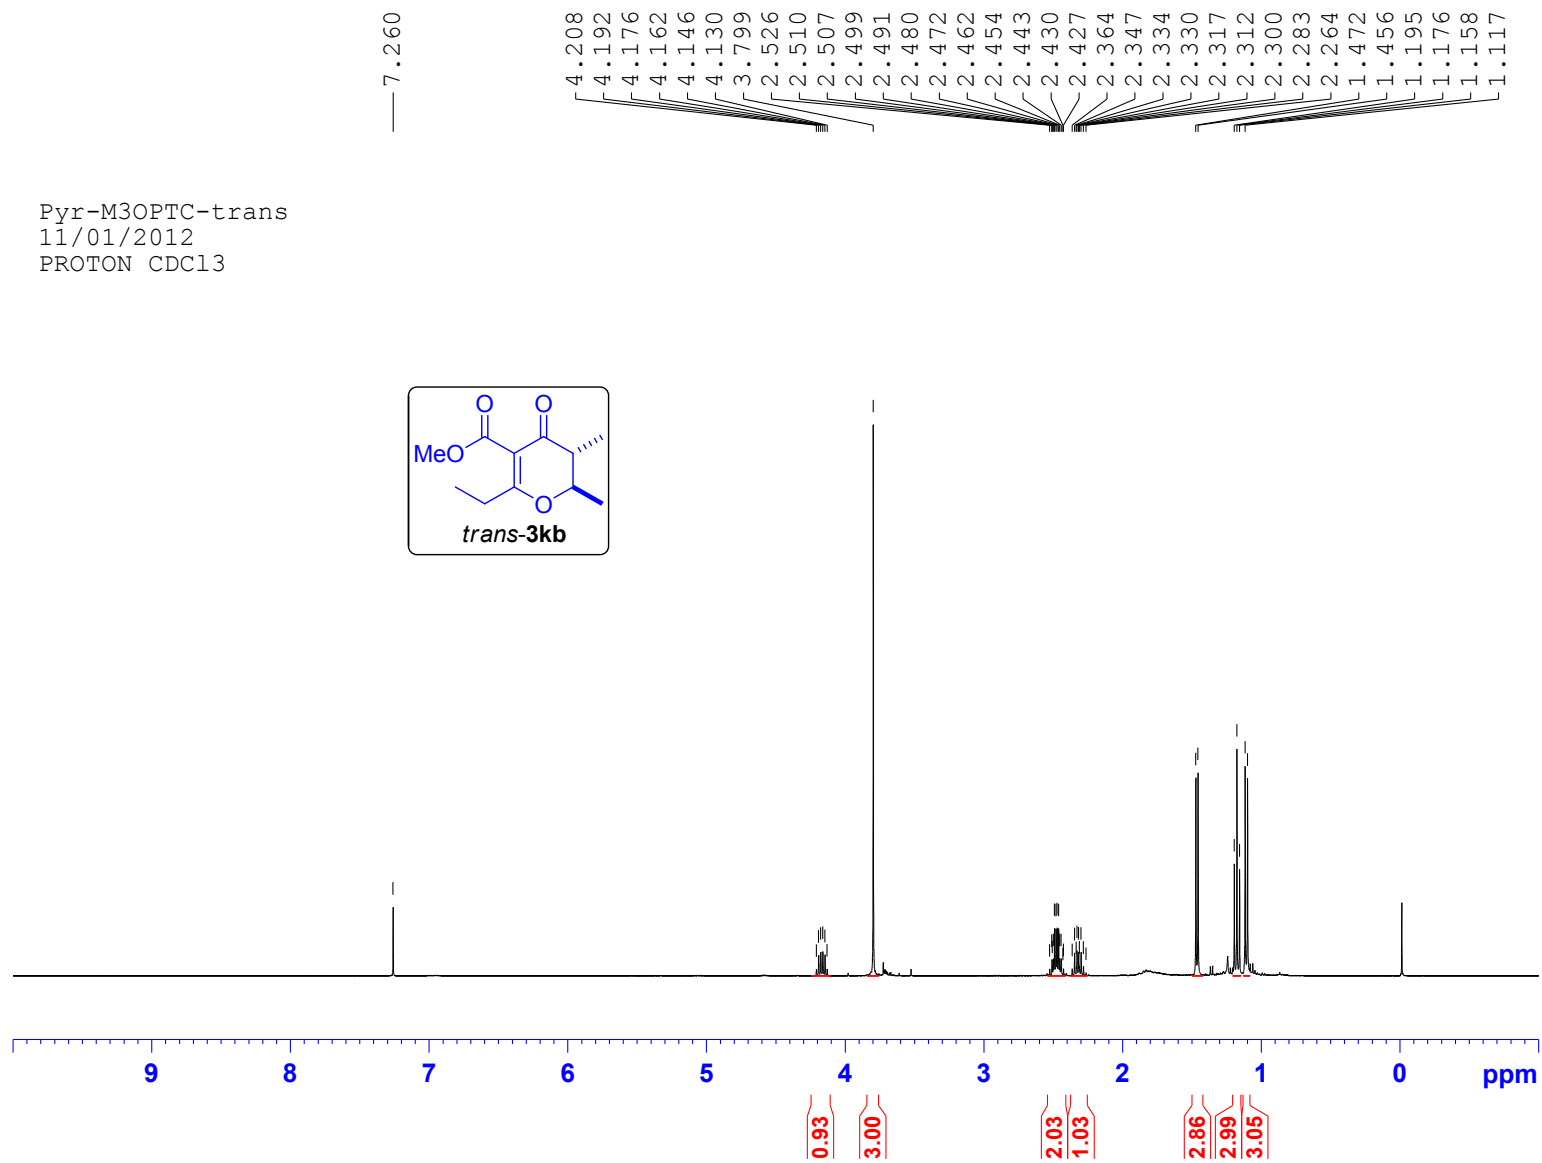

— 191.02  
— 180.00  
— 166.47  
  
— 110.63  
  
— 80.47  
— 77.41  
— 77.09  
— 76.77  
  
— 52.09  
— 44.43  
  
— 27.16  
— 19.05  
— 11.24  
— 10.30

PYR-92 M3OP-trans  
23/01/2012  
C13CPD CDC13

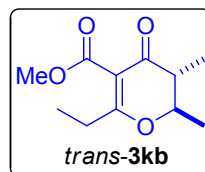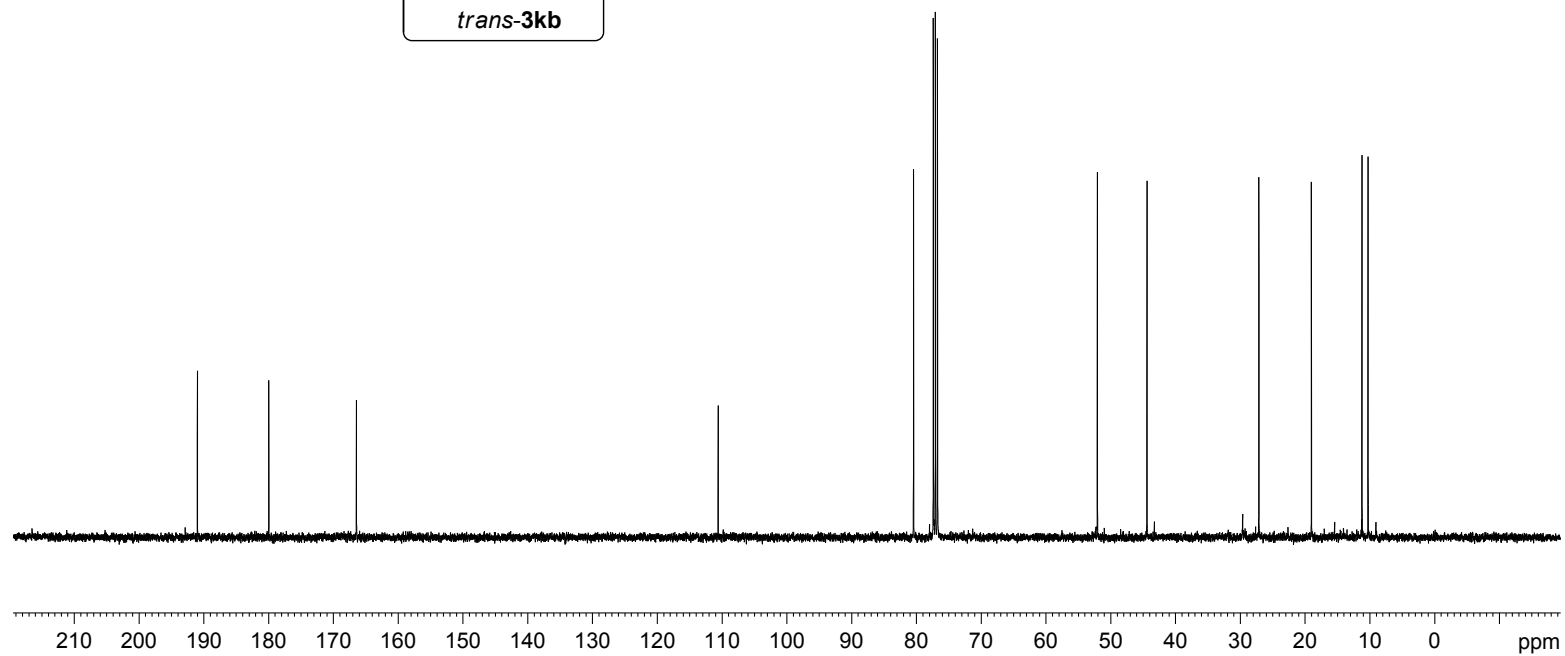

PYR-M3OPSC-cis  
11/01/2012  
PROTON CDCl3

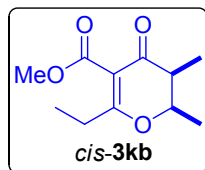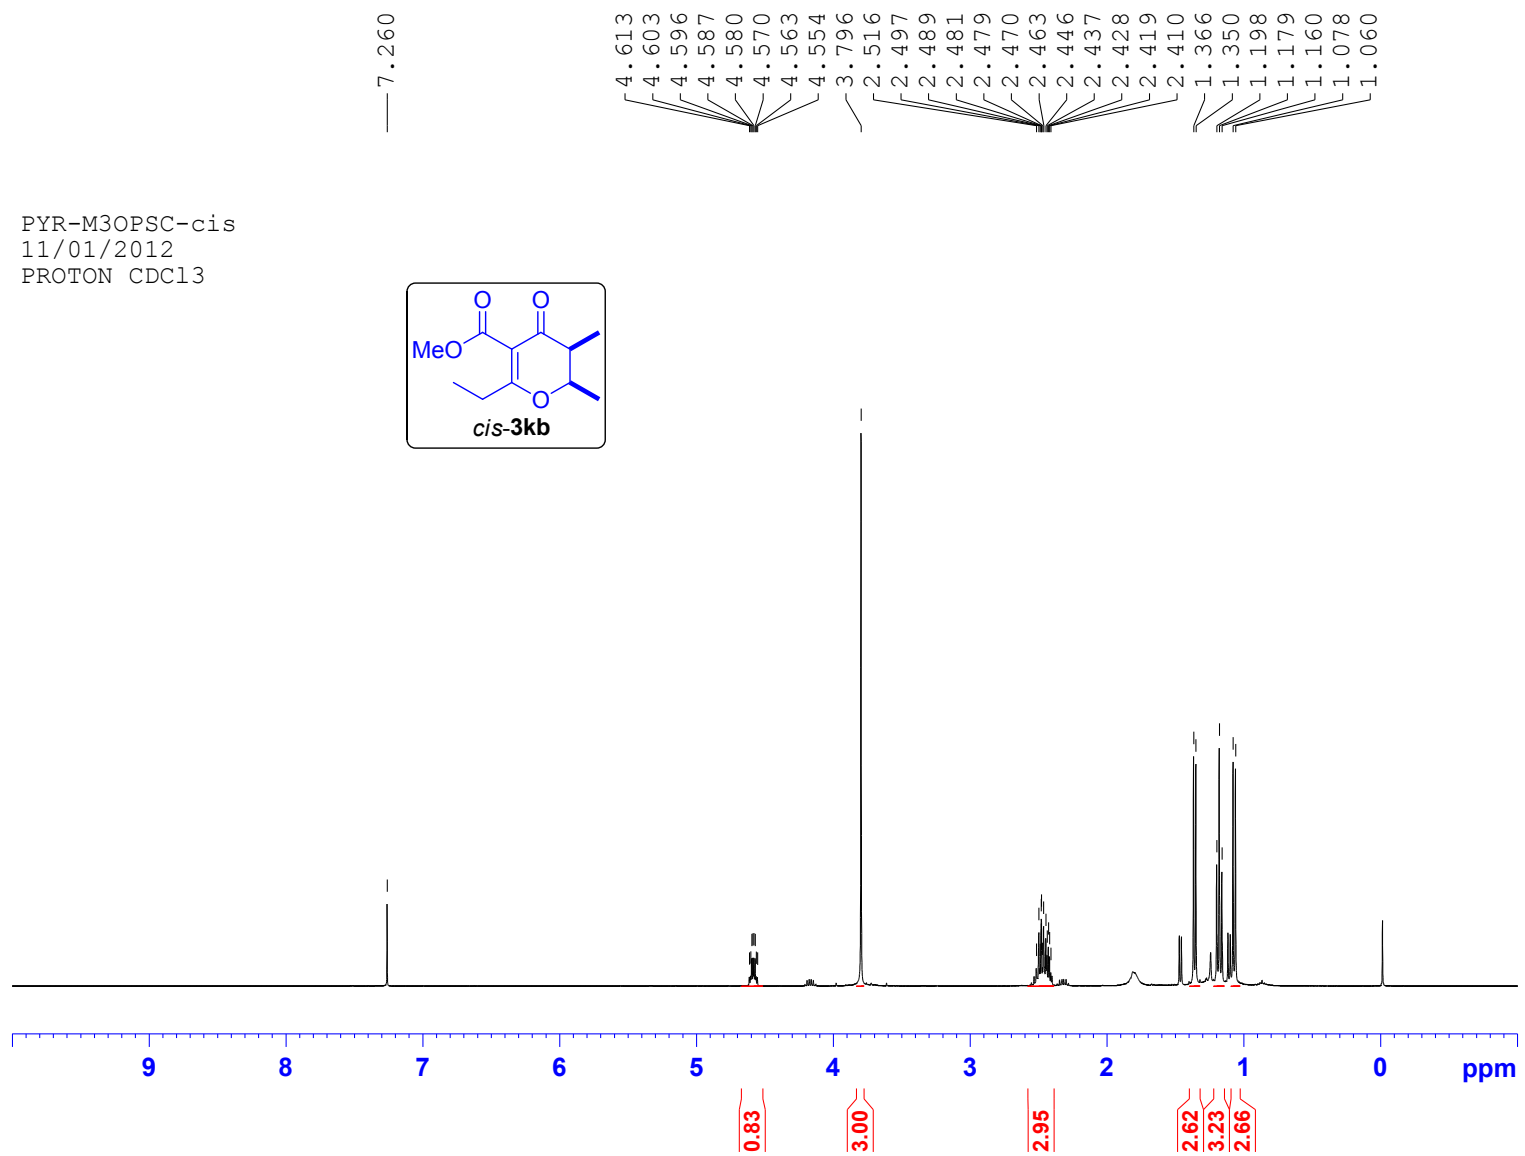

PYR-M3OP-cis  
23/01/2012  
C13CPD CDC13

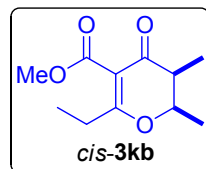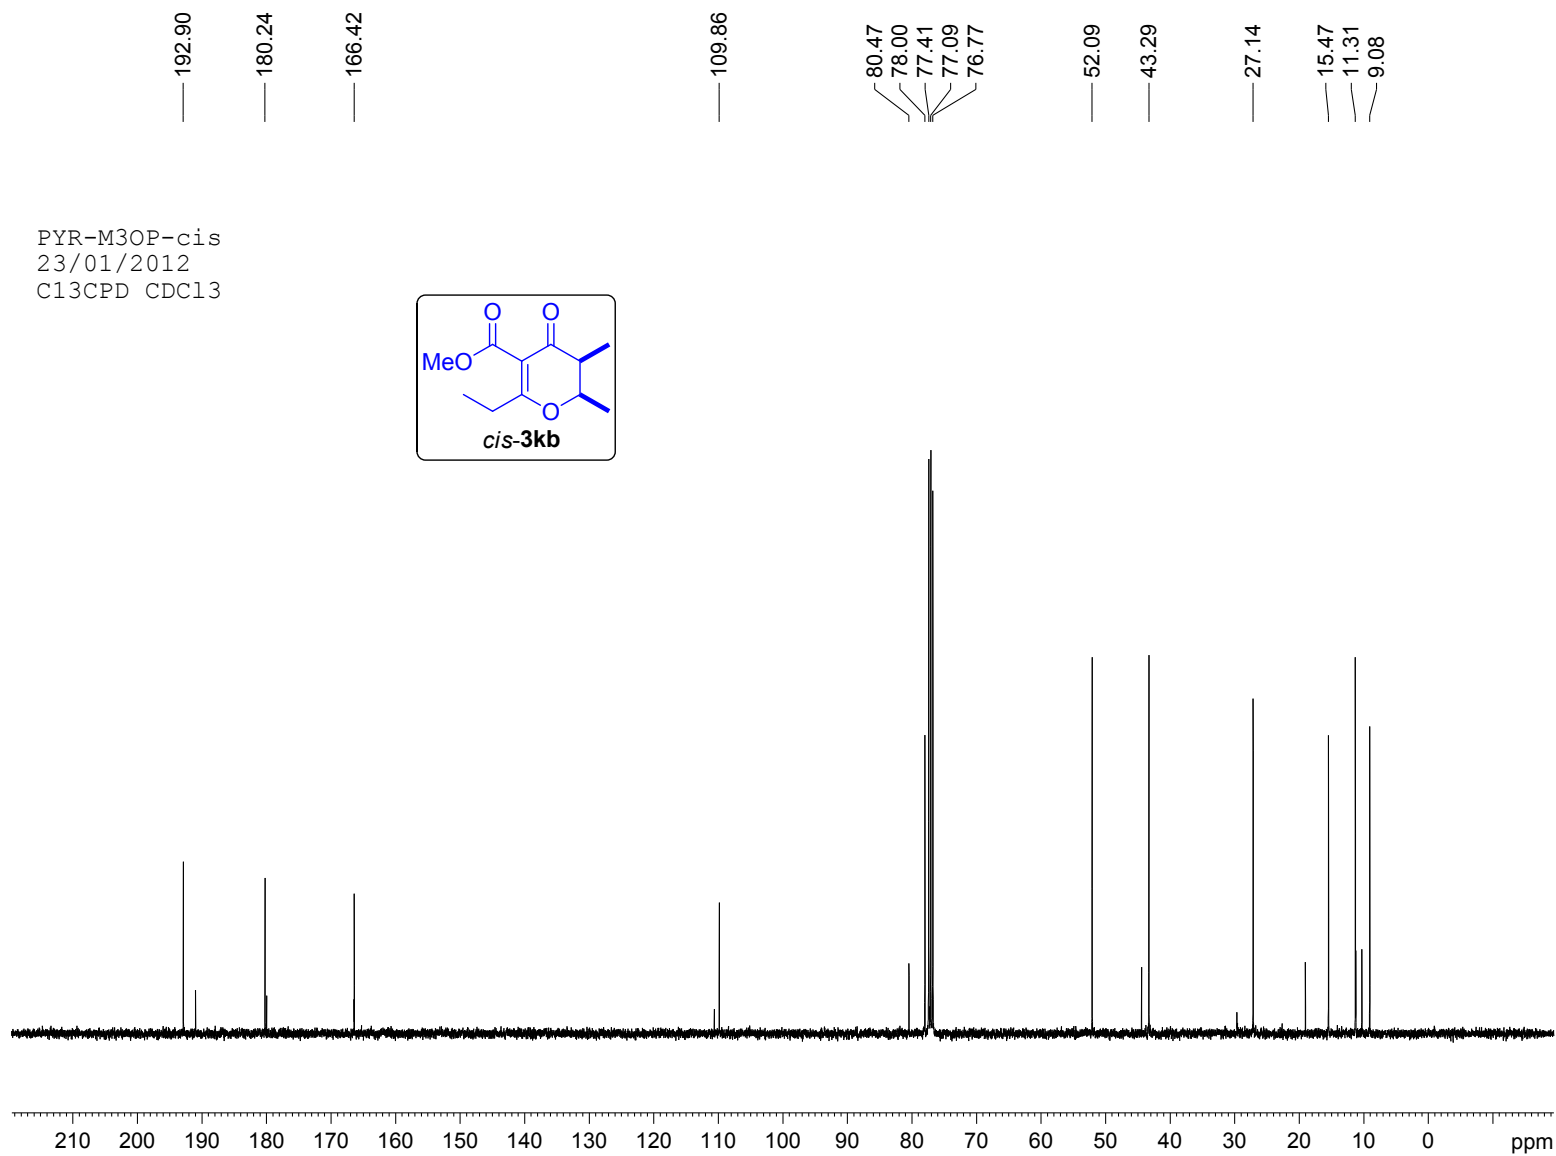

PYR-297 HEP S-I  
15/07/2013  
PROTON CDC13

— 7.260

4.333  
4.316  
4.308  
4.302  
4.291  
4.286  
4.277  
4.260  
3.746  
2.440  
2.431  
2.415  
2.167  
1.821  
1.803  
1.785  
1.767  
1.749  
1.736  
1.730  
1.722  
1.717  
1.703  
1.698  
1.684  
1.667  
1.663  
1.649  
1.644  
0.982  
0.964  
0.945

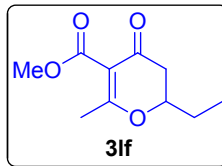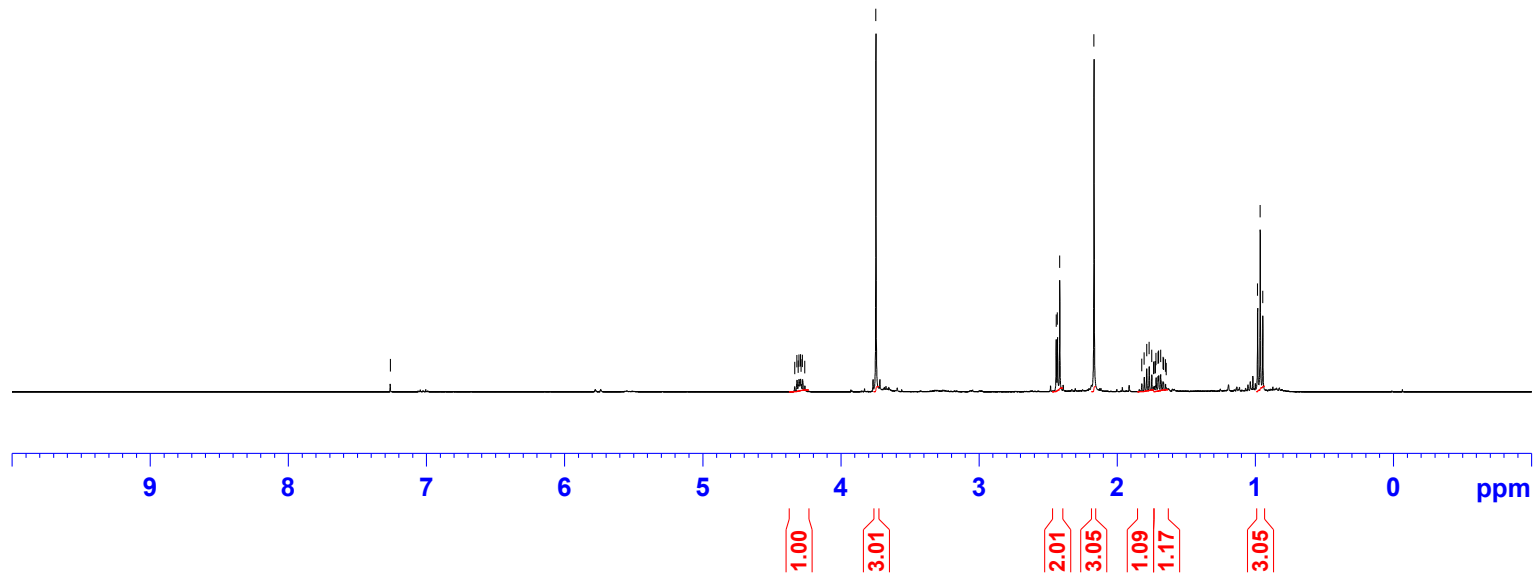

— 188.34  
— 177.77  
— 166.15

— 111.97

80.39  
77.44  
77.12  
76.81

— 51.99

— 40.34

— 27.24

— 20.45

— 8.99

PYR-297 HEP S-I  
15/07/2013  
C13CPD CDC13

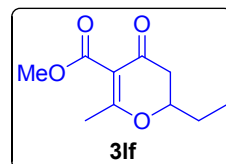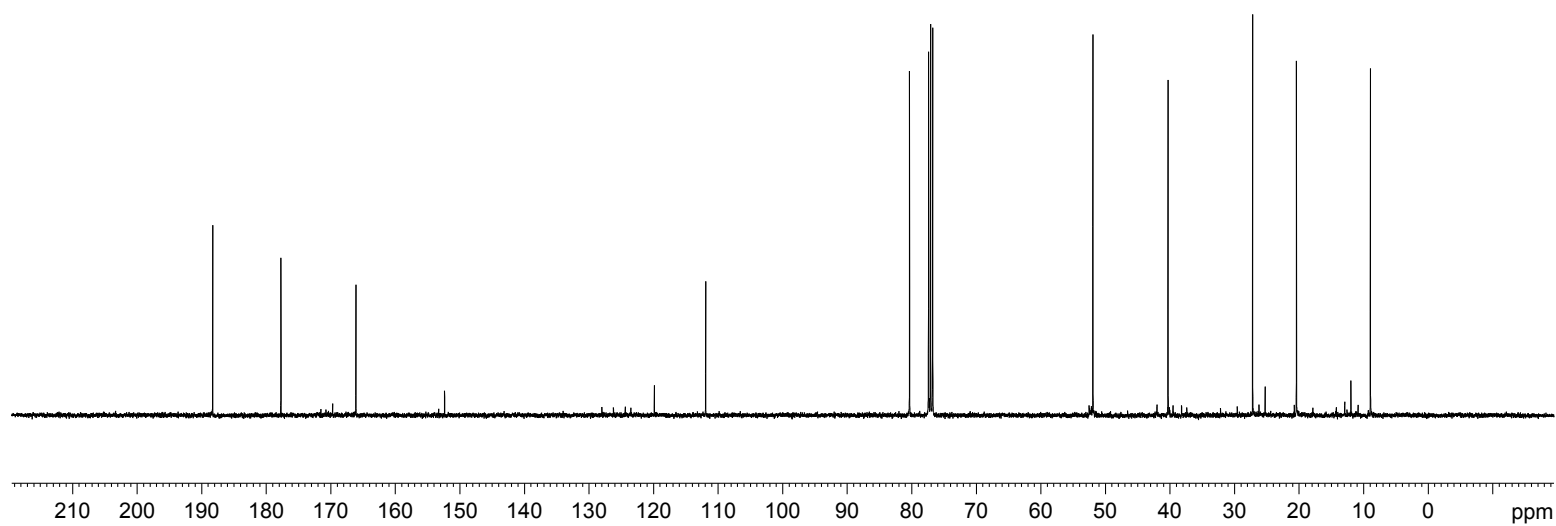

PYR ADD-SC.  
10/03/11  
PROTON CDC13

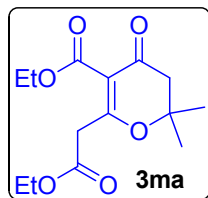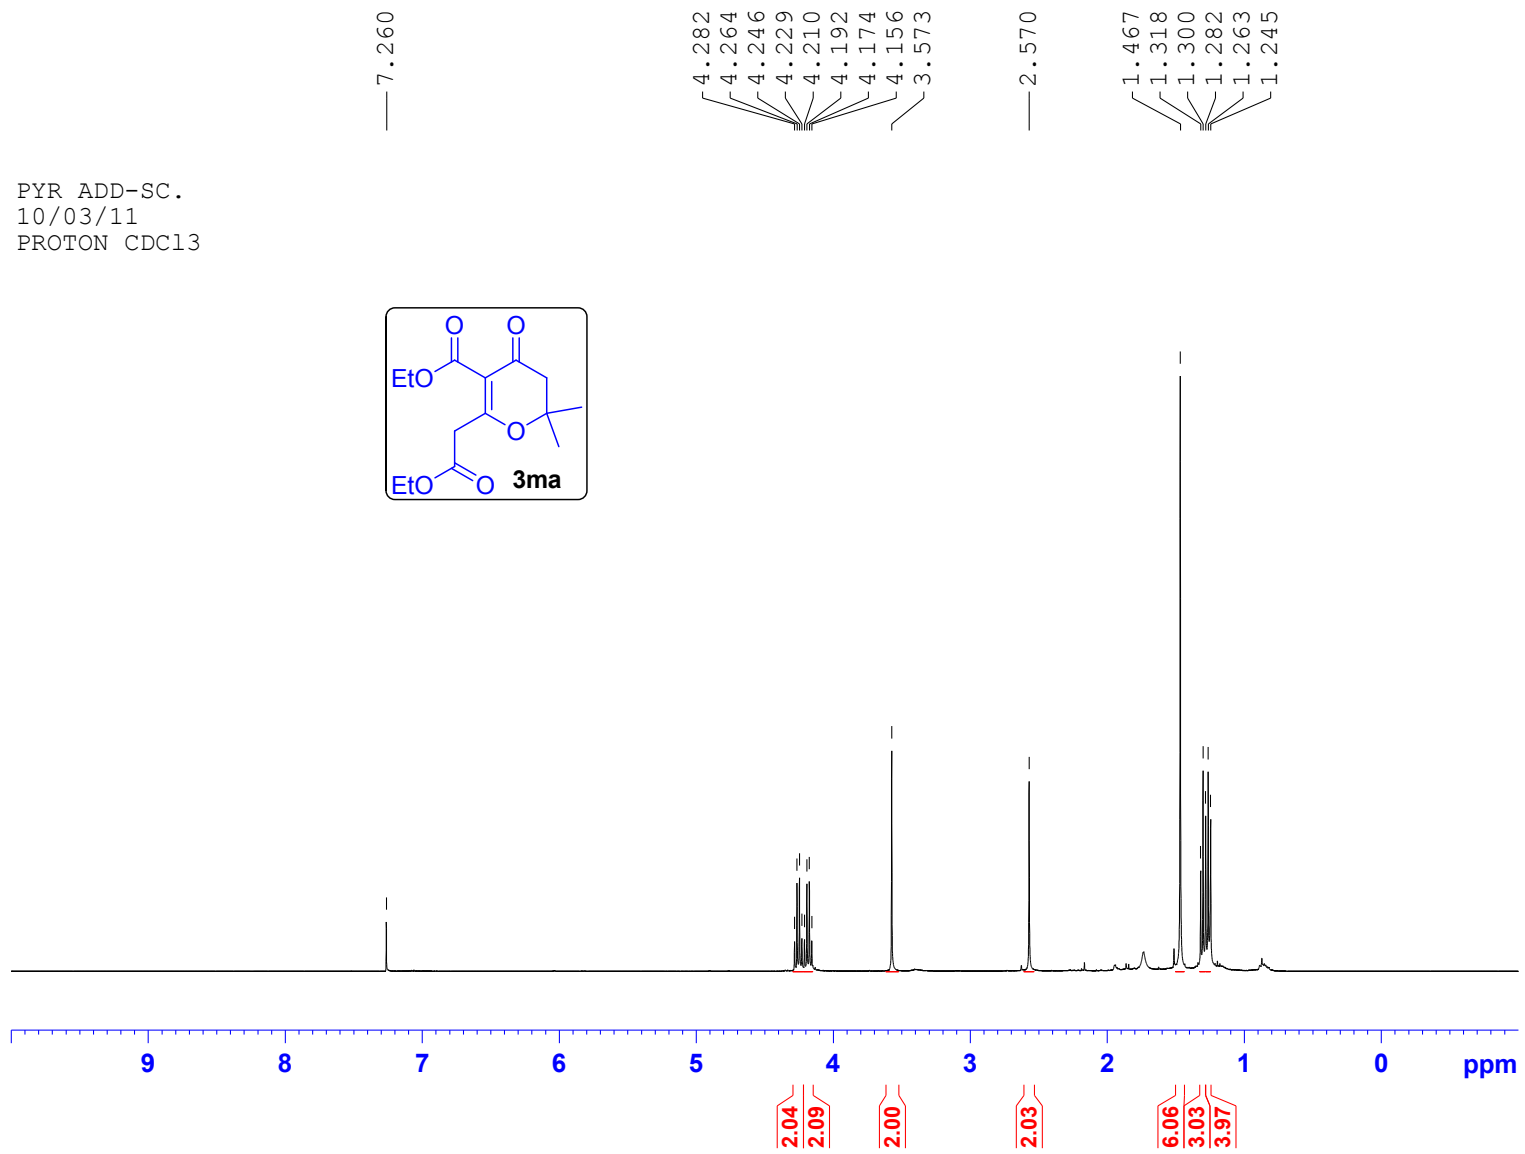



188.34  
171.71  
167.61  
164.96  
111.25  
82.58  
77.43  
77.11  
76.80  
61.46  
61.07  
47.44  
40.54  
25.99  
14.14  
14.08

PYR-DEADC-SC  
23/01/2012  
C13CPD CDC13

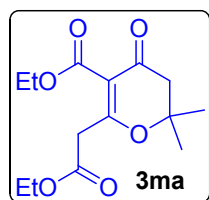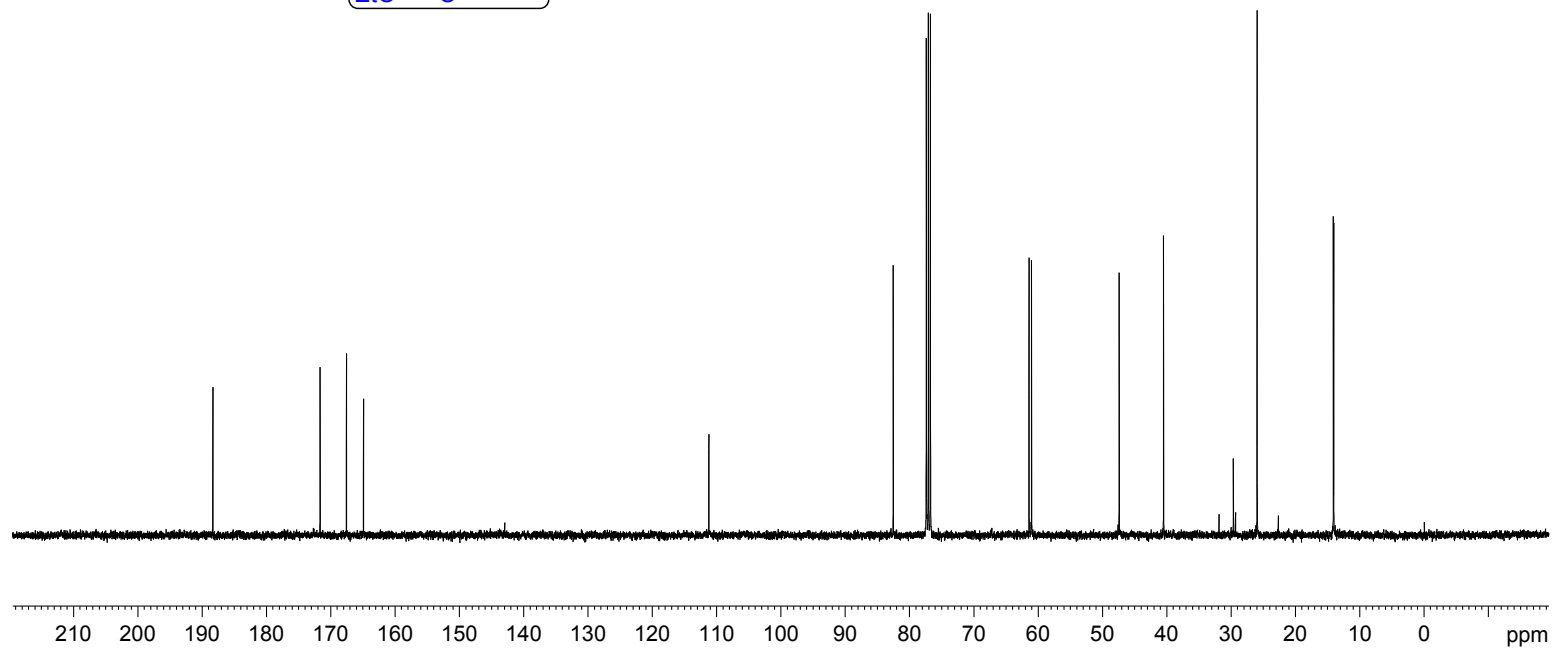

PYR-AEDDC-CRA.  
15/3/11  
PROTON CDC13

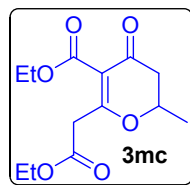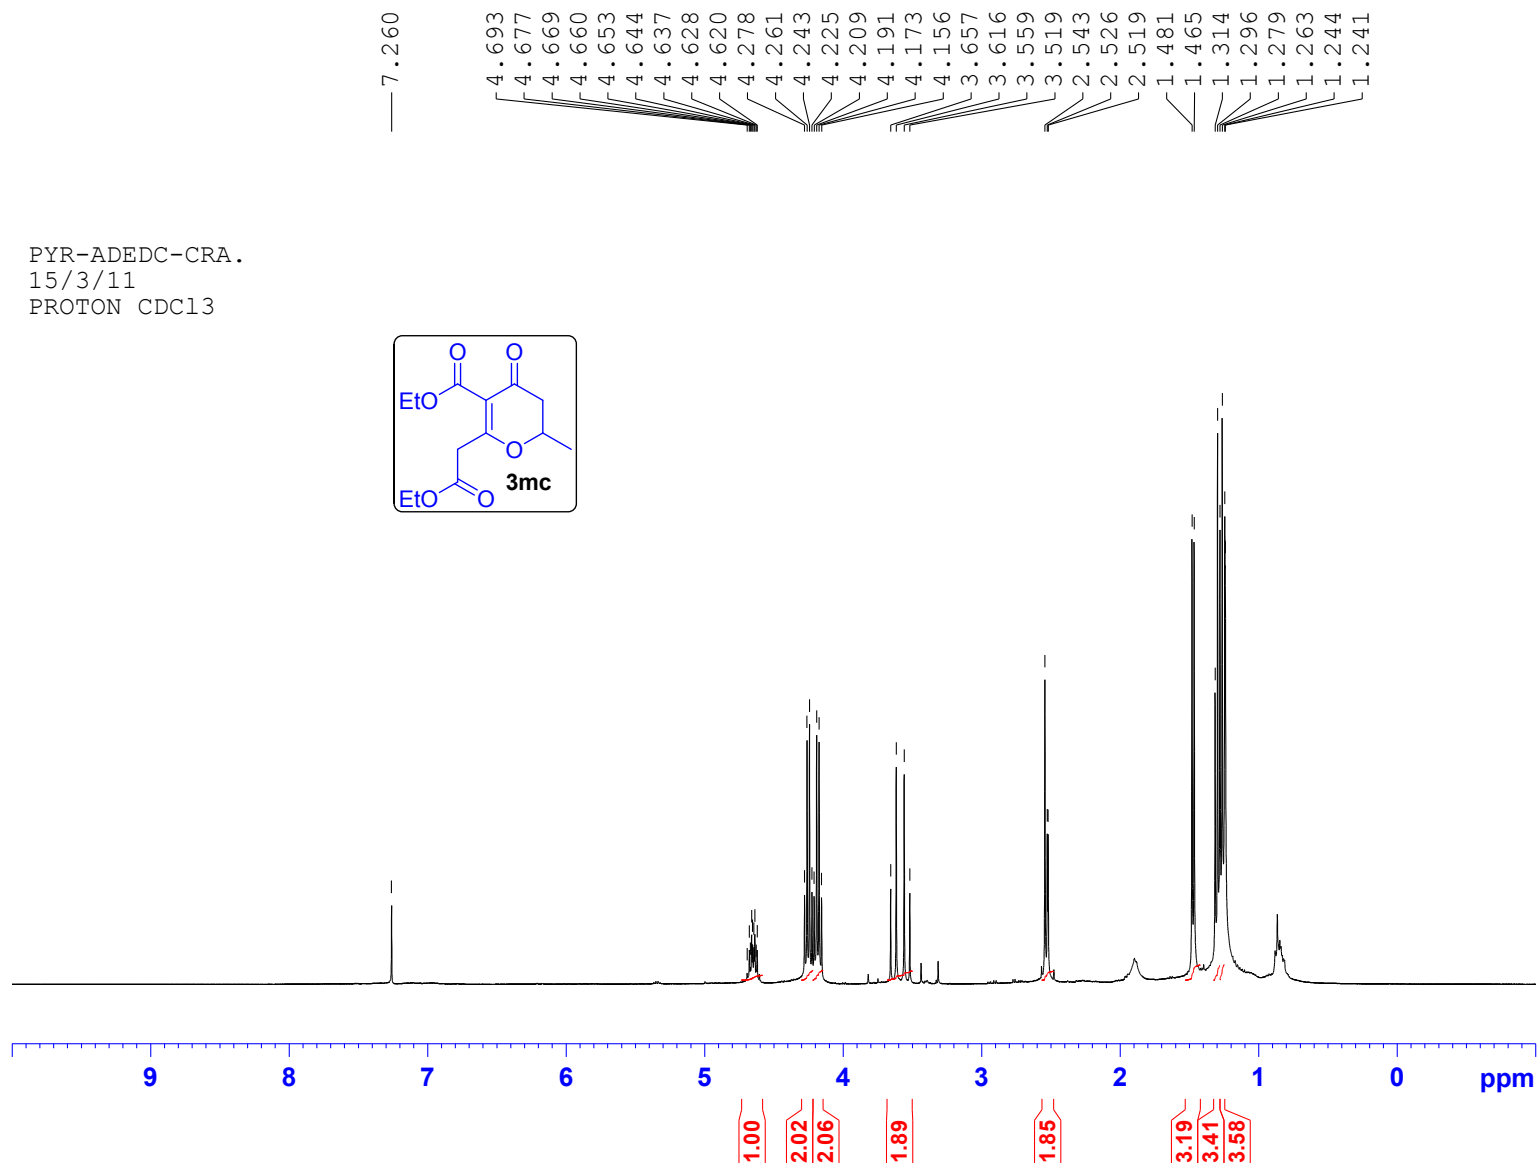

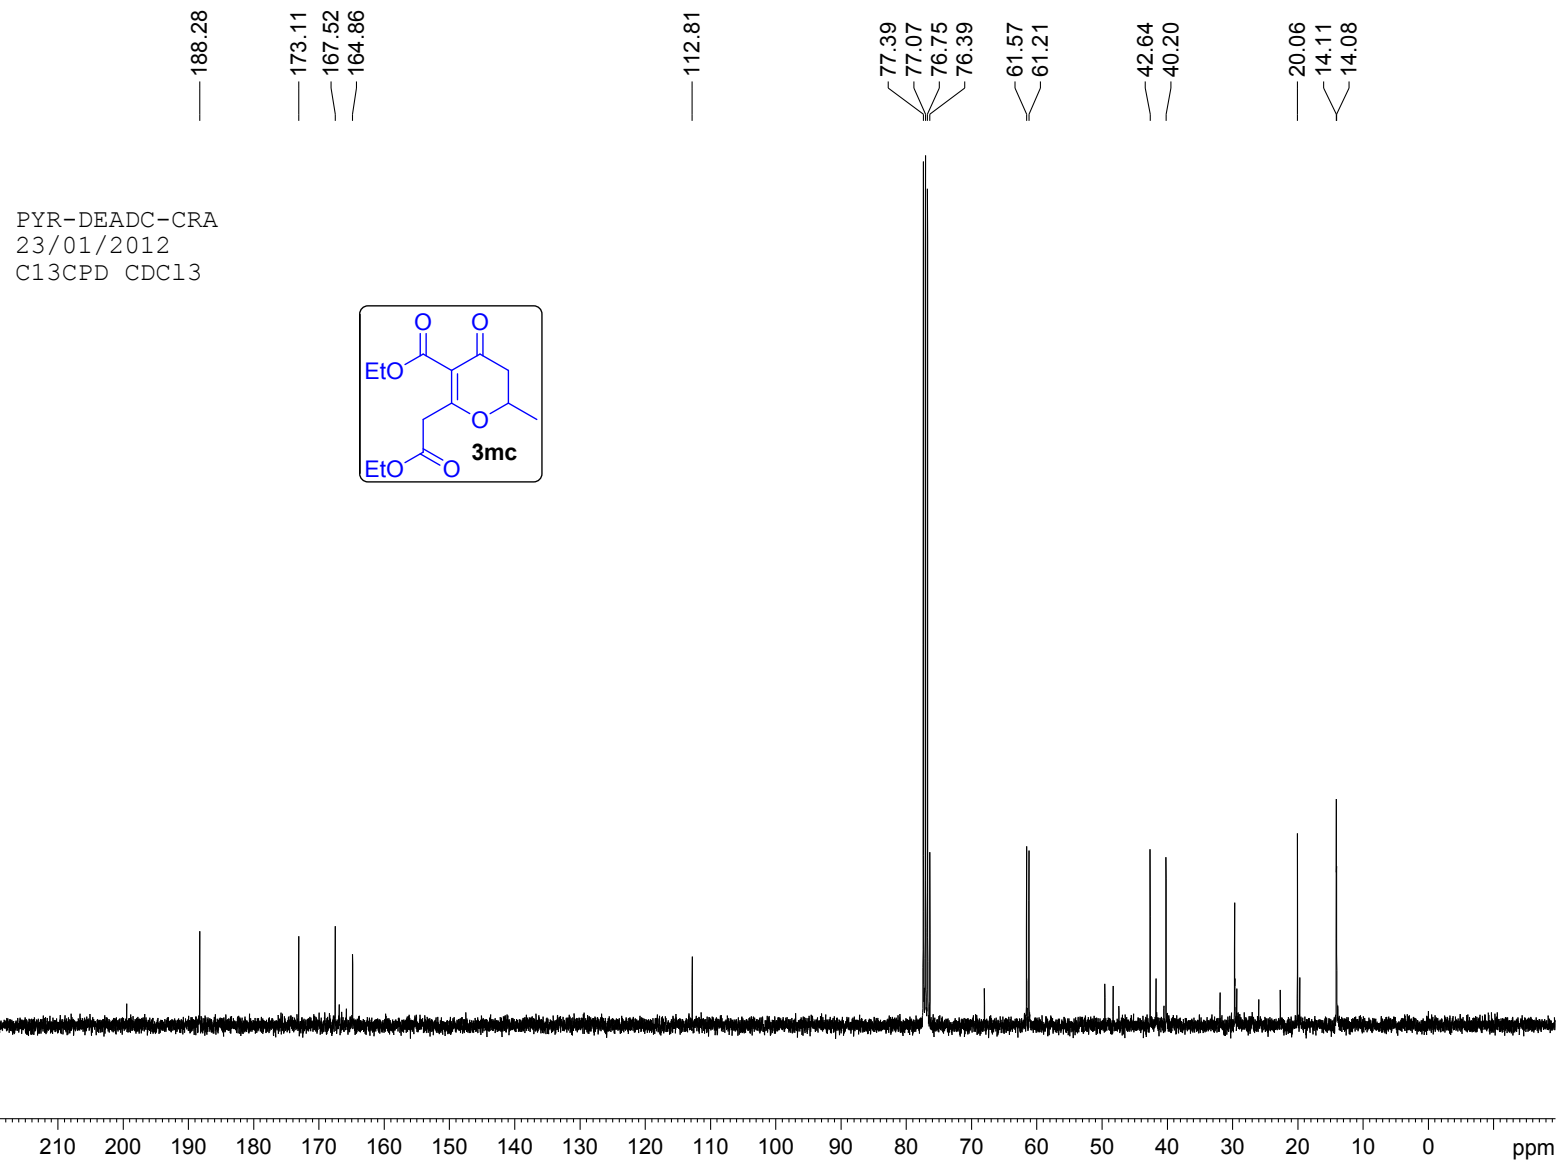

PYR-EPAASC-X  
30/07/2013  
PROTON CDC13

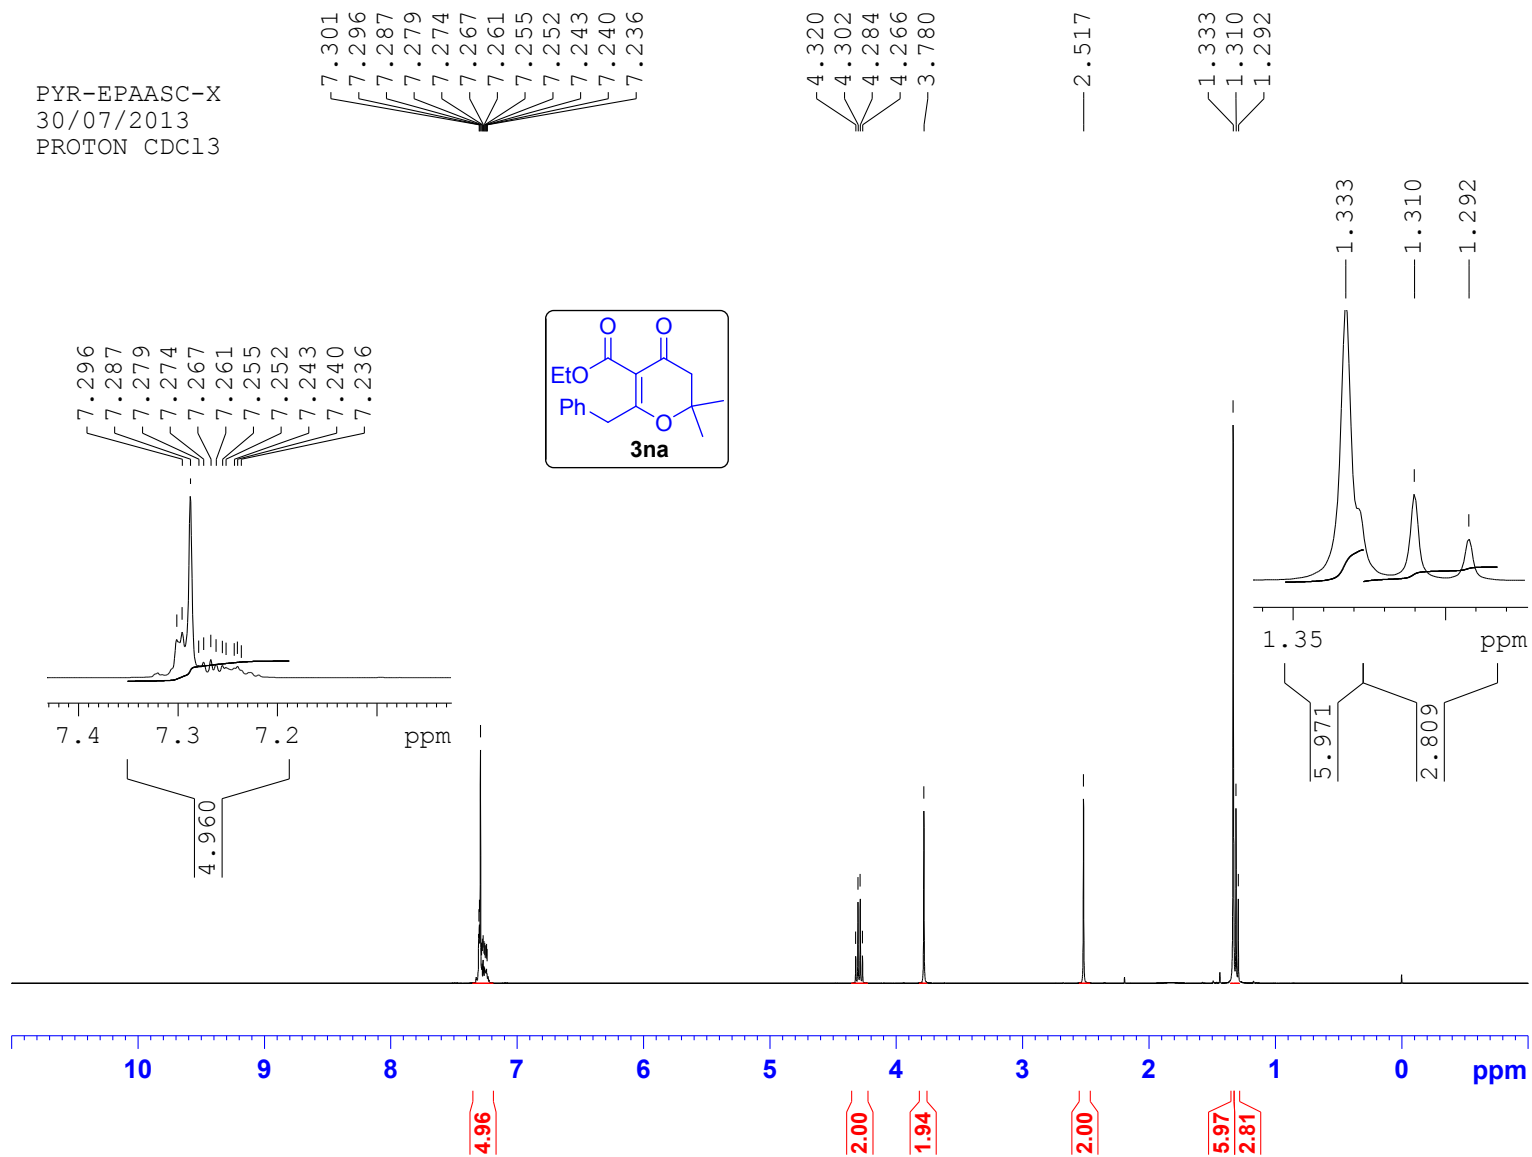

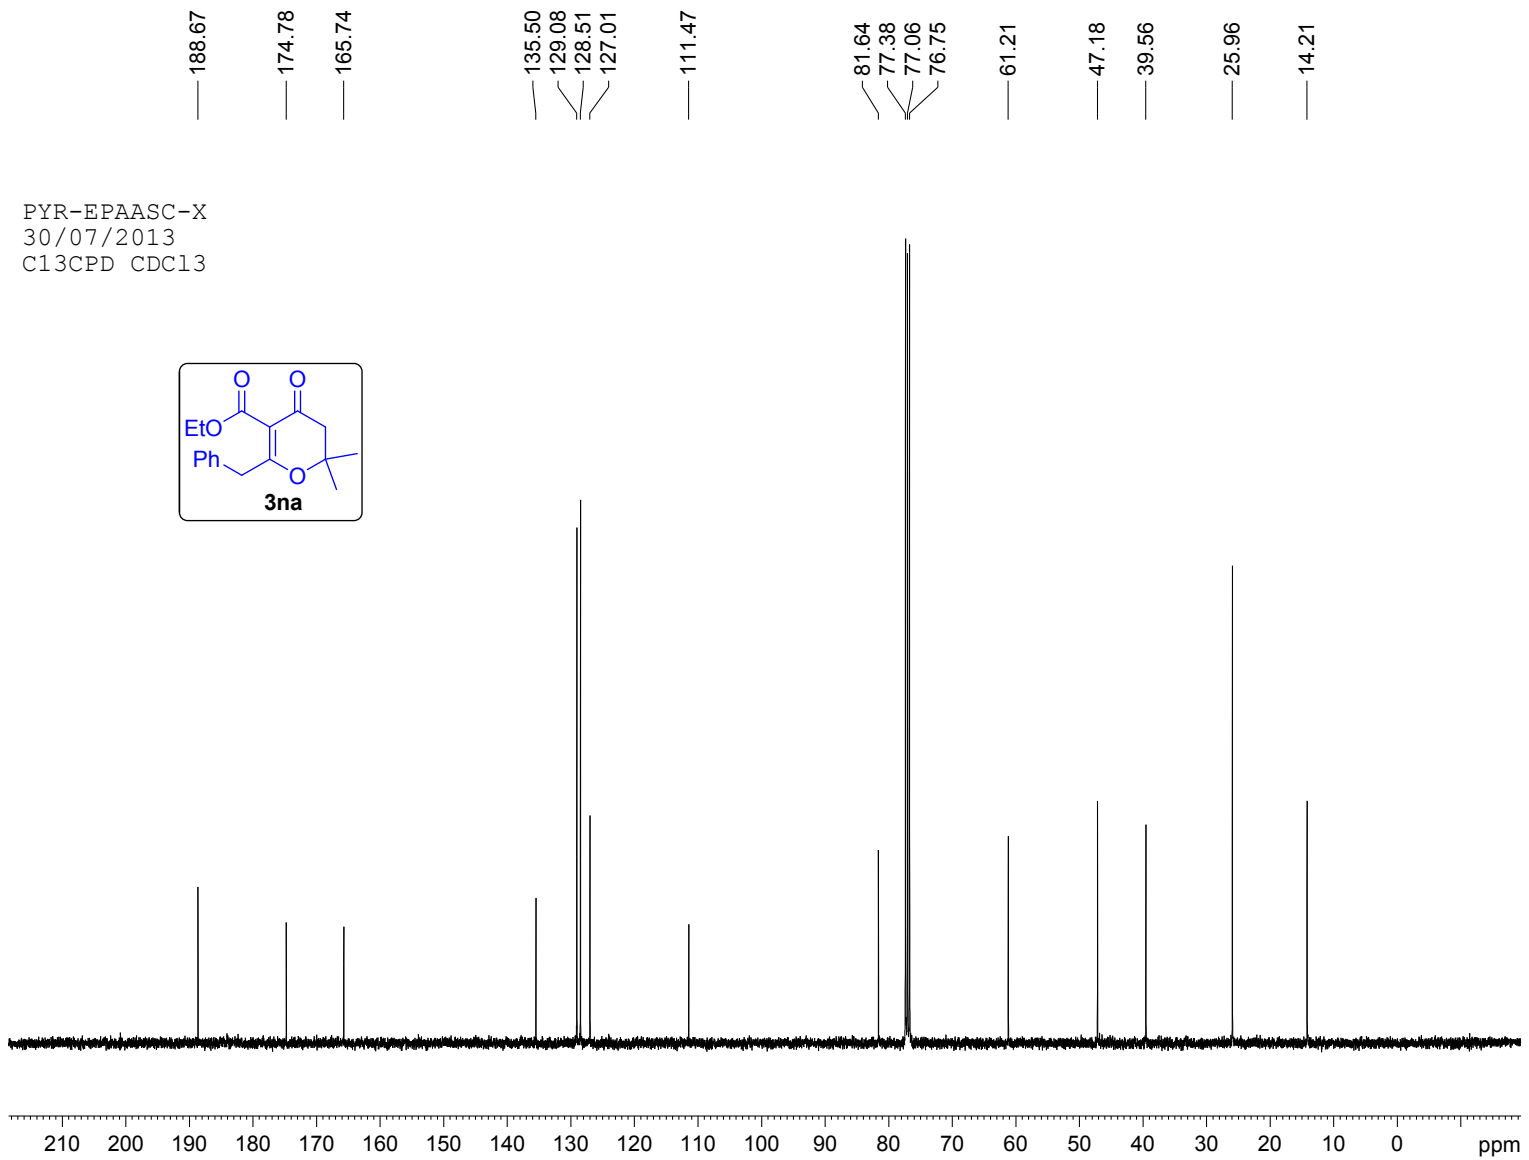

PYR-396 EPAA-CRC  
PROTON CDC13 19.12.2013

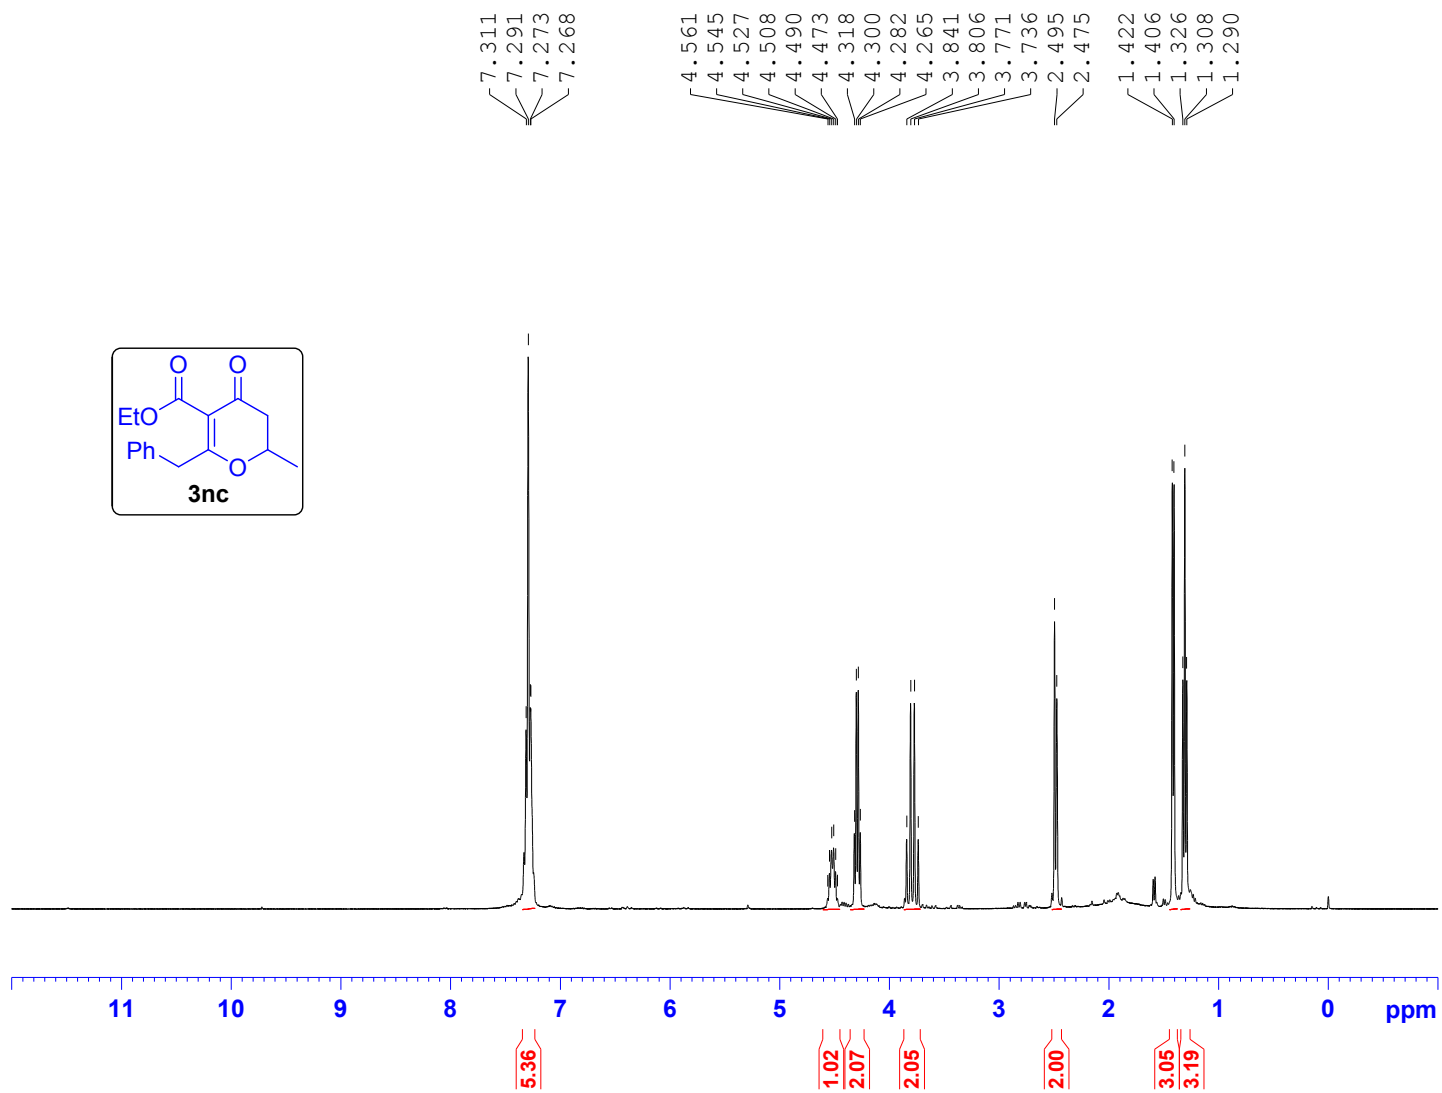

PYR-396 EPAA-CRC  
C13CPD CDC13 19.12.2013

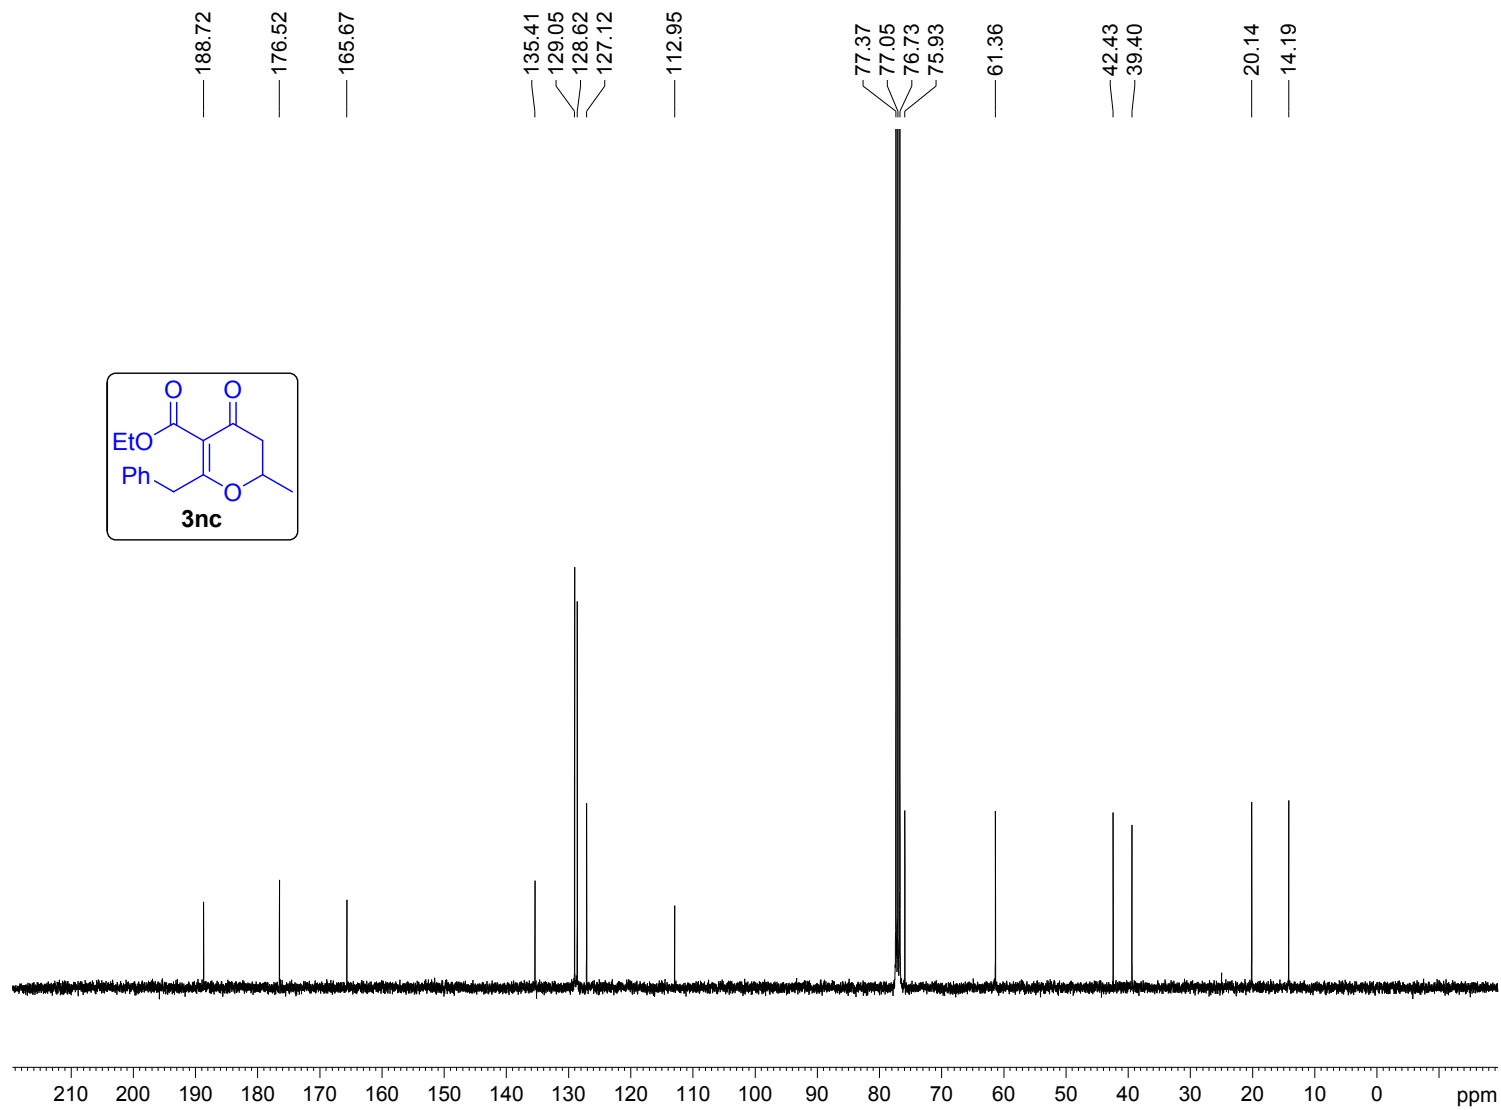

7.672  
7.669  
7.652  
7.649  
7.591  
7.587  
7.570  
7.552  
7.548  
7.369  
7.348  
7.311  
7.291  
7.270  
6.526  
6.007  
6.004  
6.001

2.281  
2.069

Pyr-11-98 BEN-COUM  
11/01/2012  
PROTON CDC13

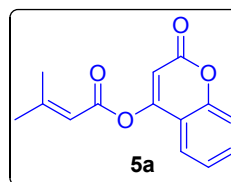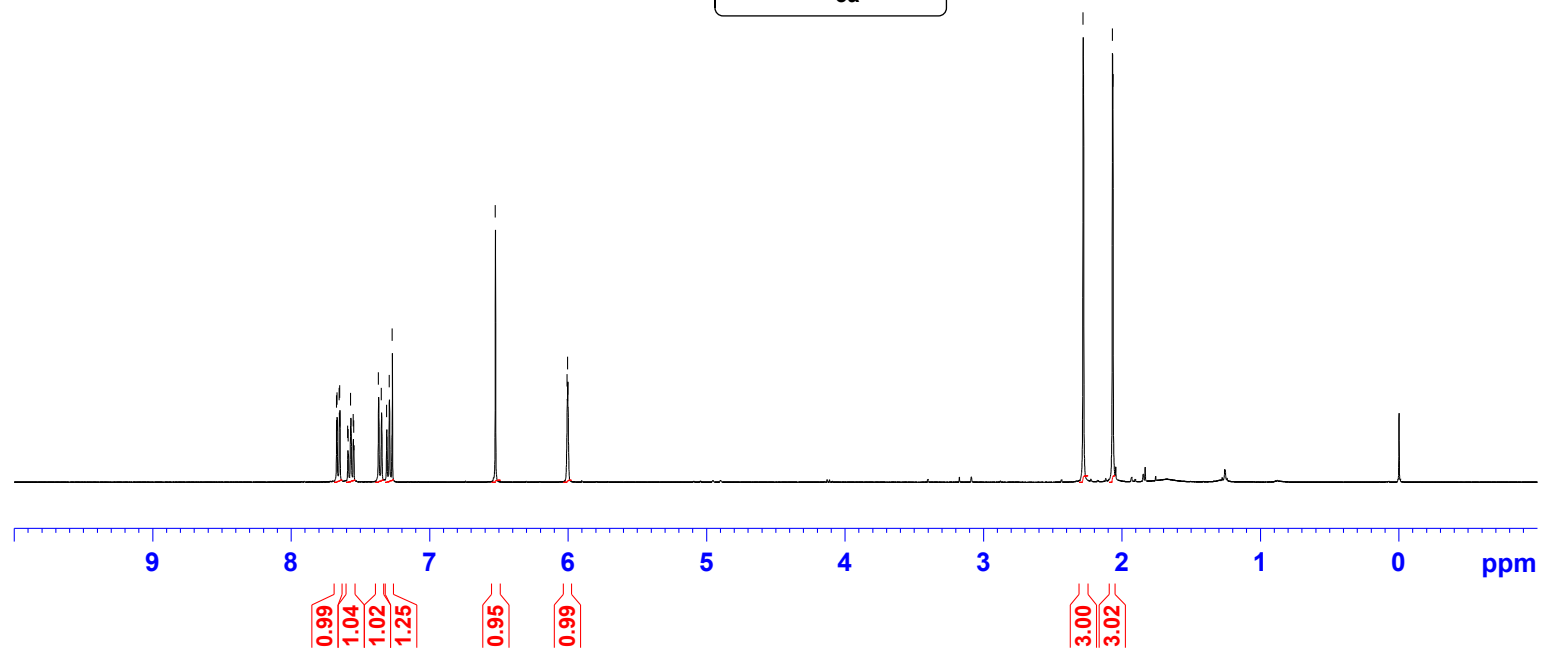



PYR-98 Ben-coum  
16/06/2012  
C13CPD CDCl3

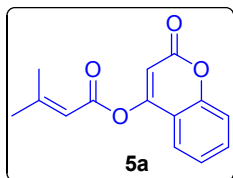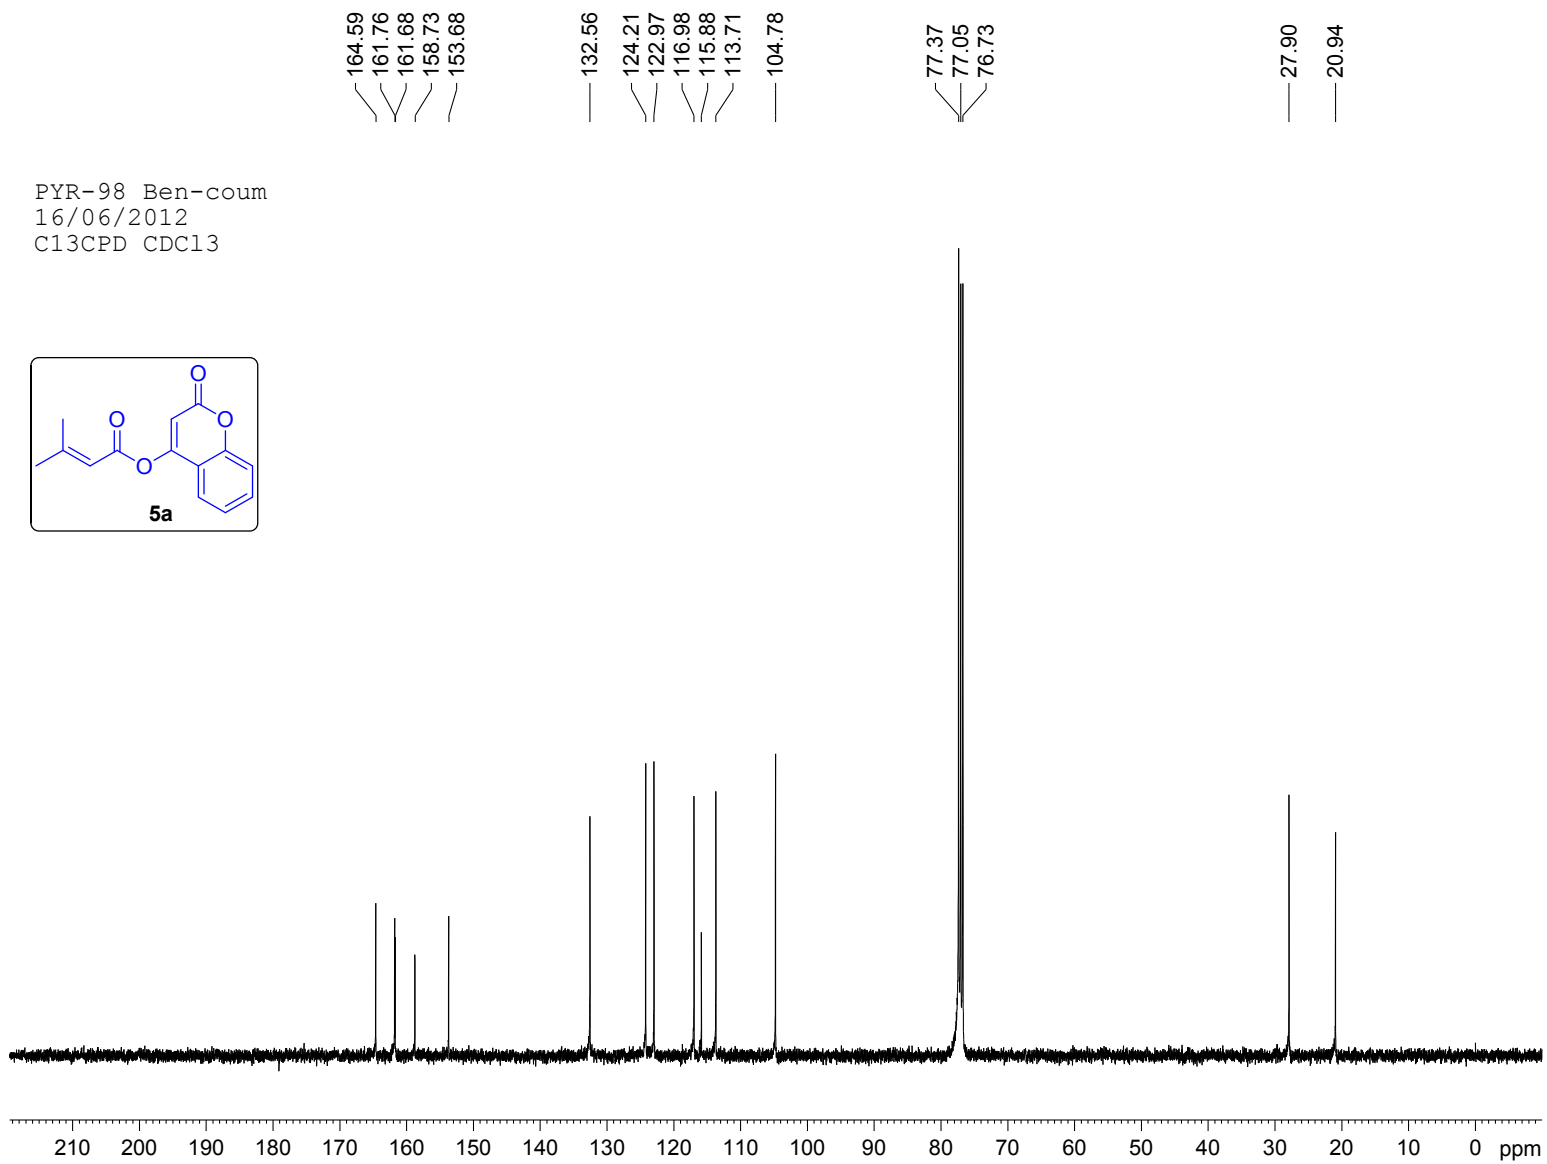

PYR-237 pyrazolon  
04/03/2013  
PROTON CDC13

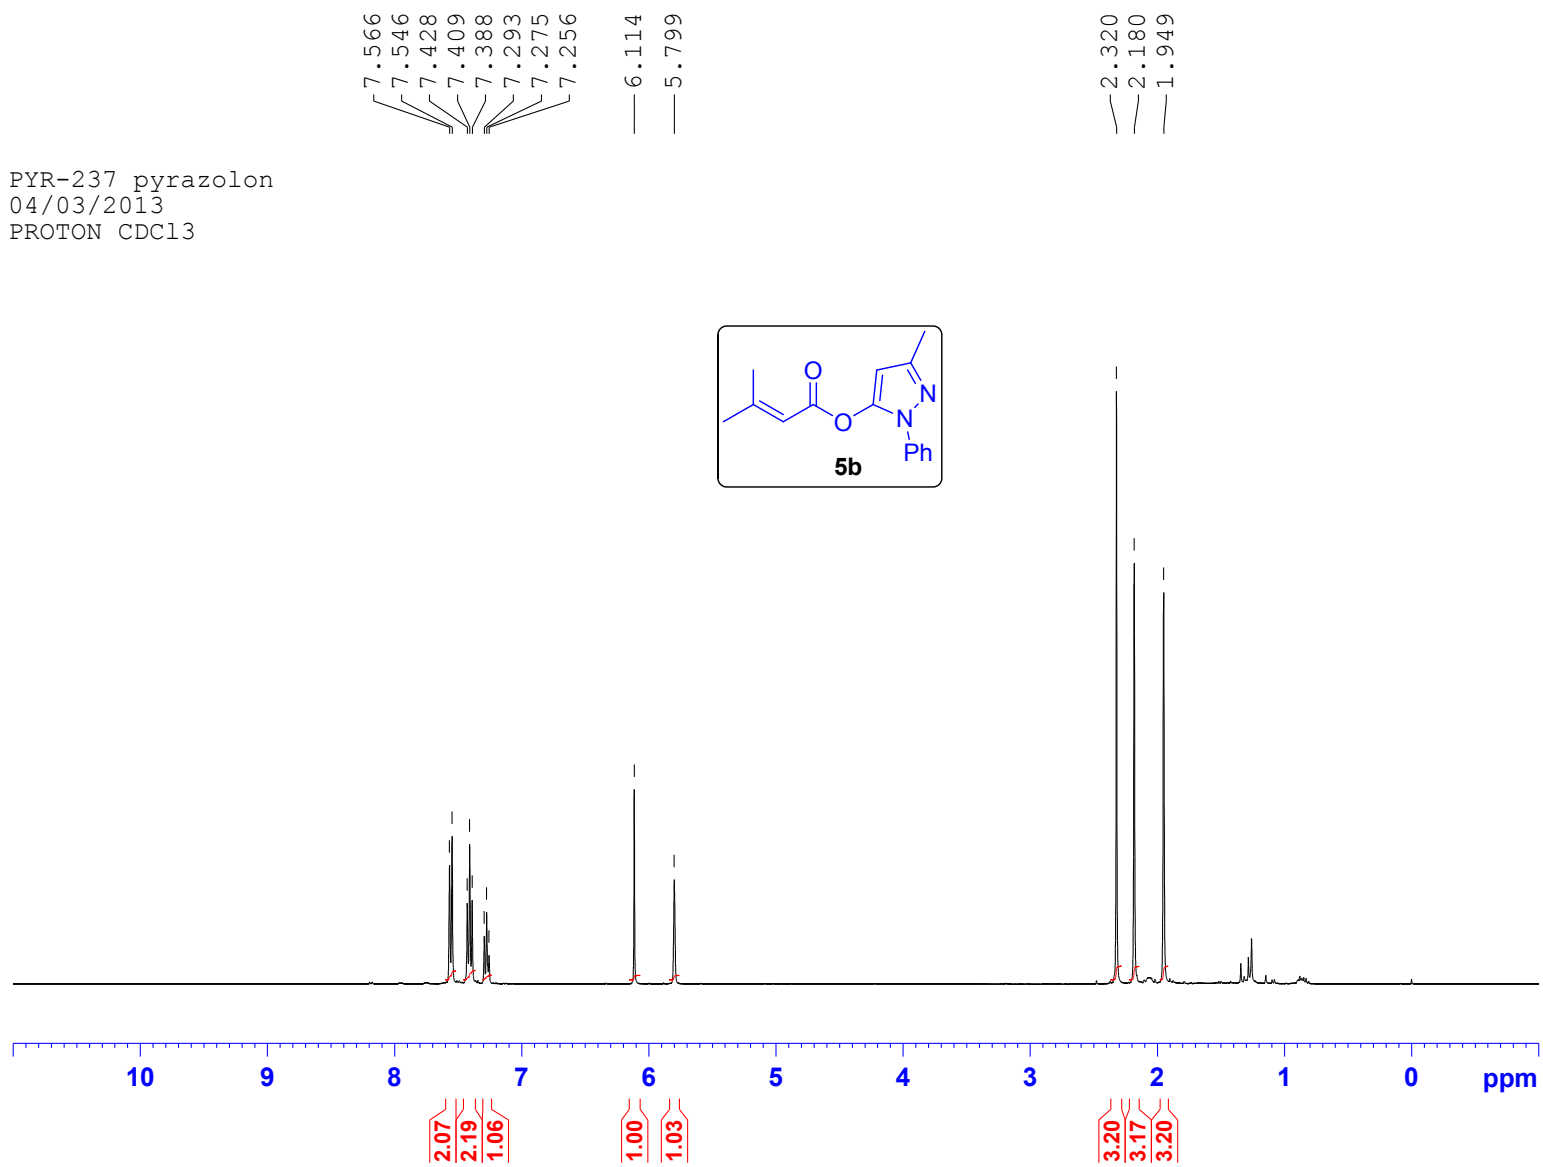

PYR-237 pyrazolon  
04/03/2013  
C13CPD CDC13

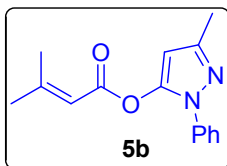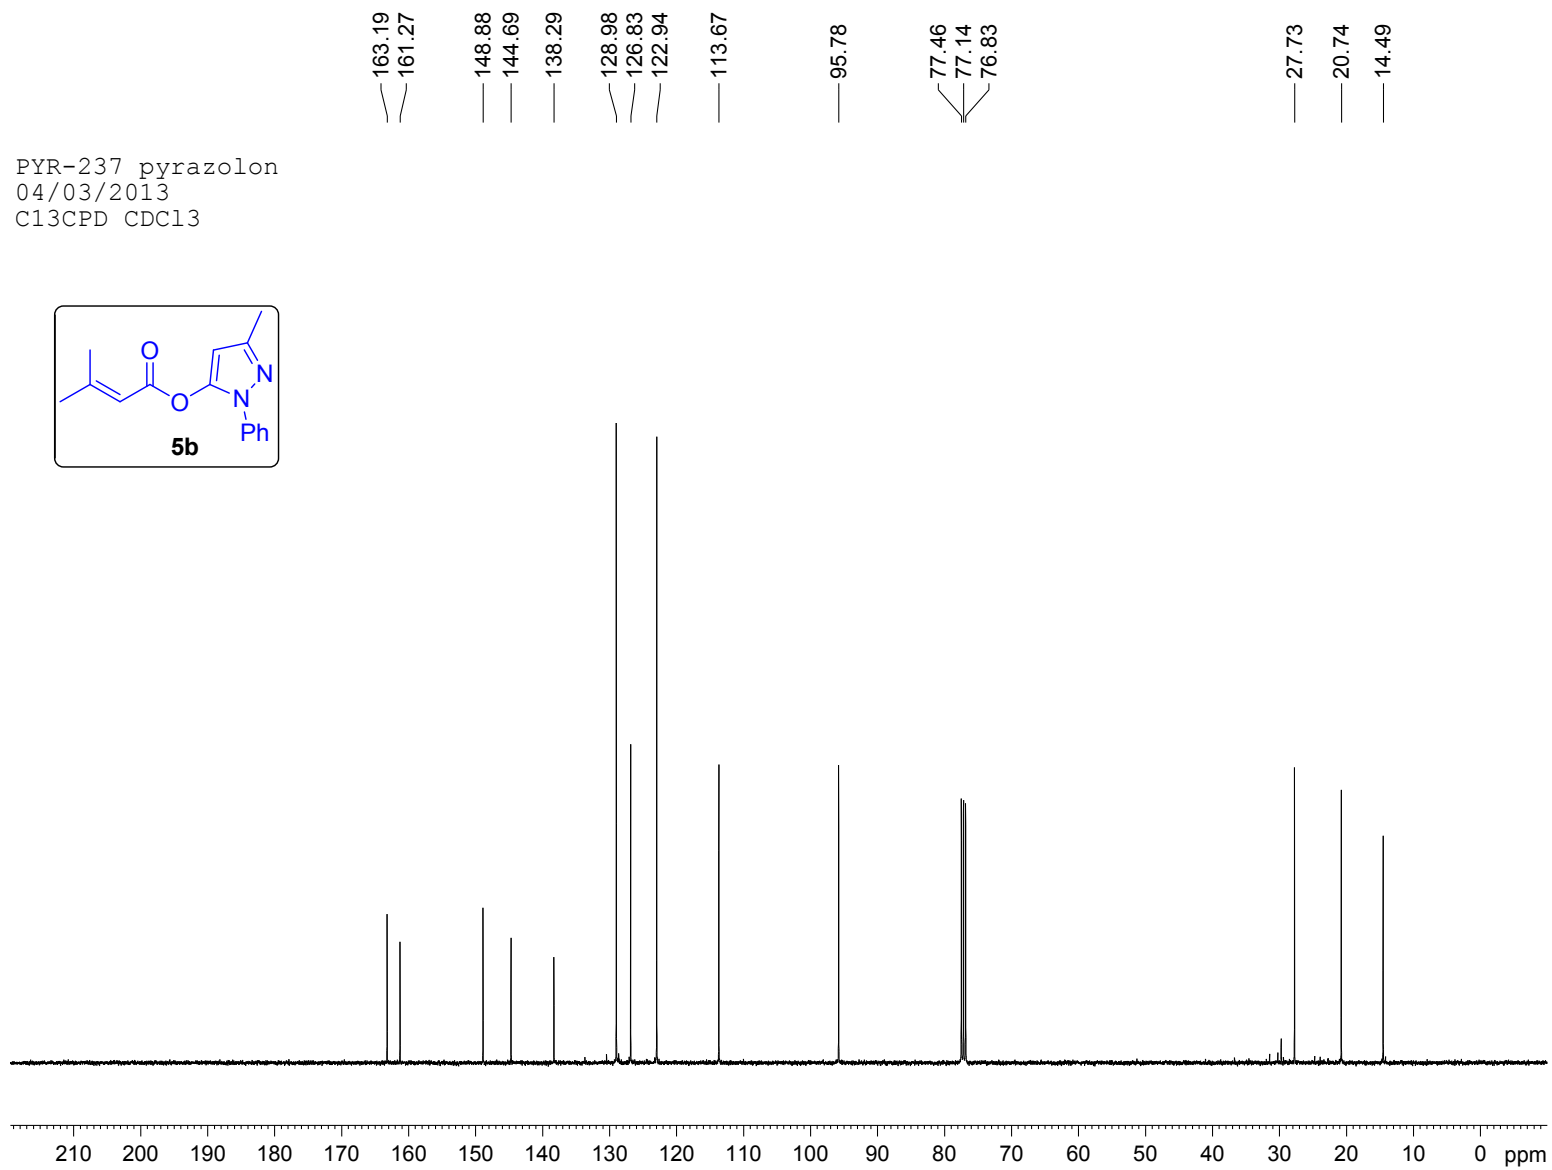

PYR-3,5-DMPAA 13/11/2013  
PROTON CDC13

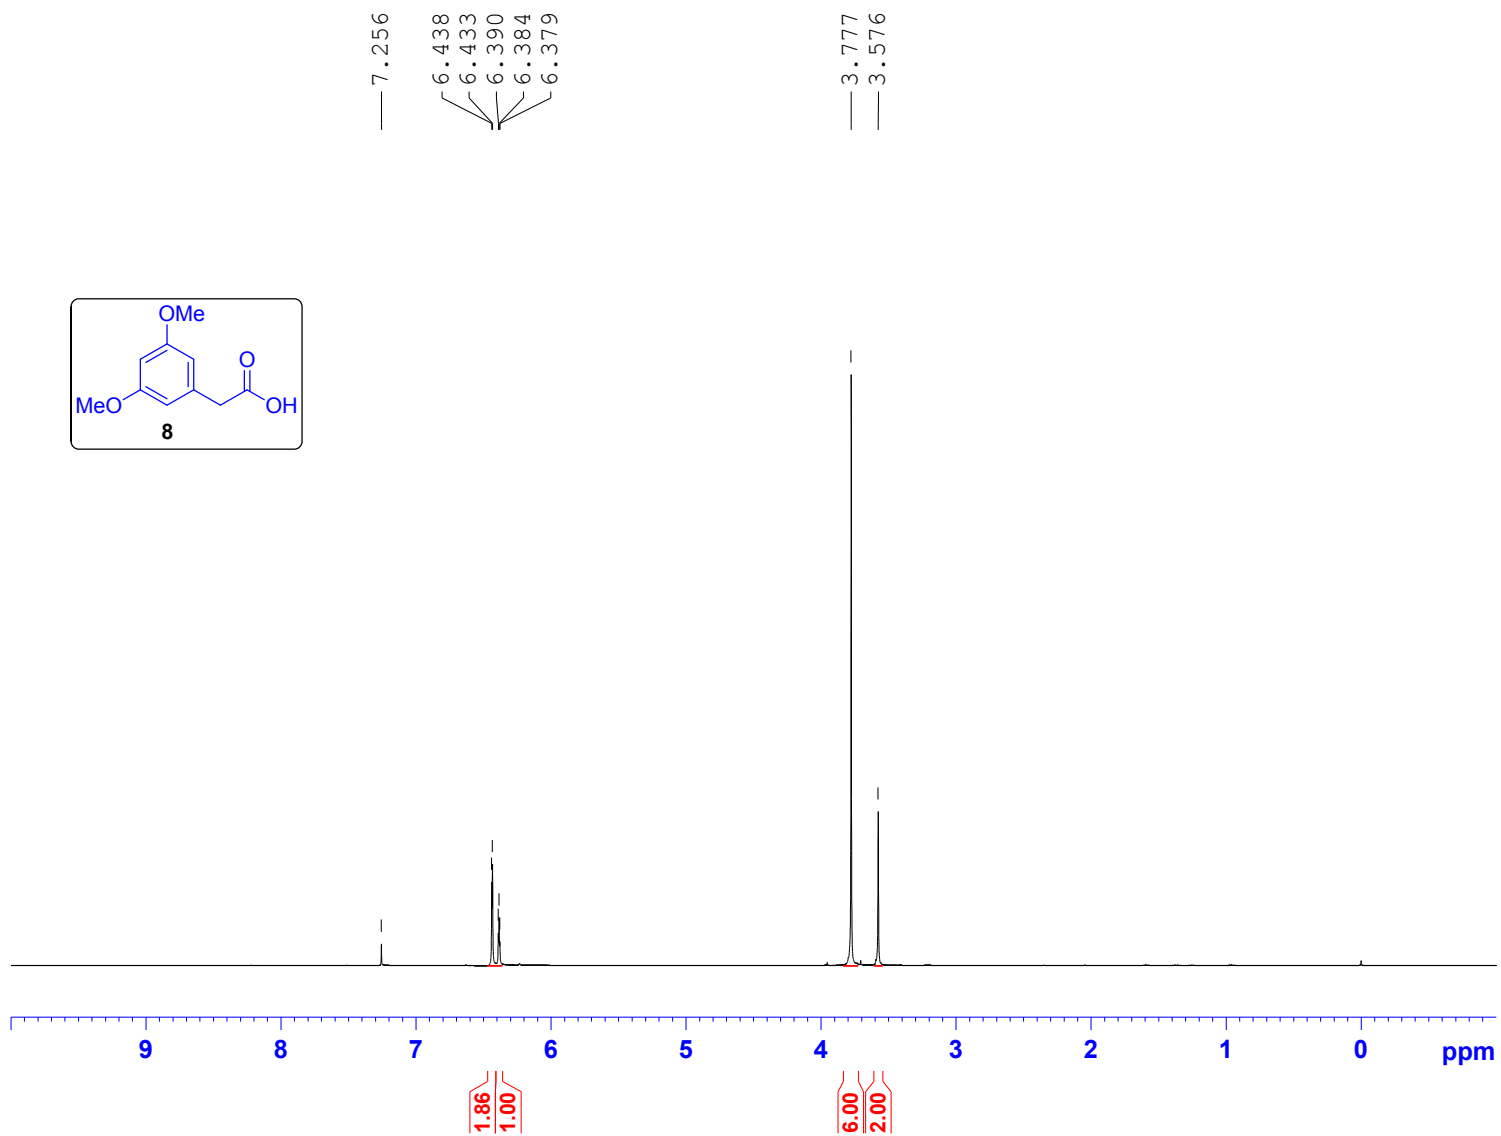

S51

PYR-3,5-DMPAA  
C13CPD CDC13

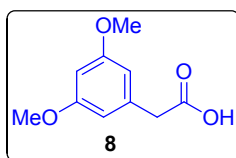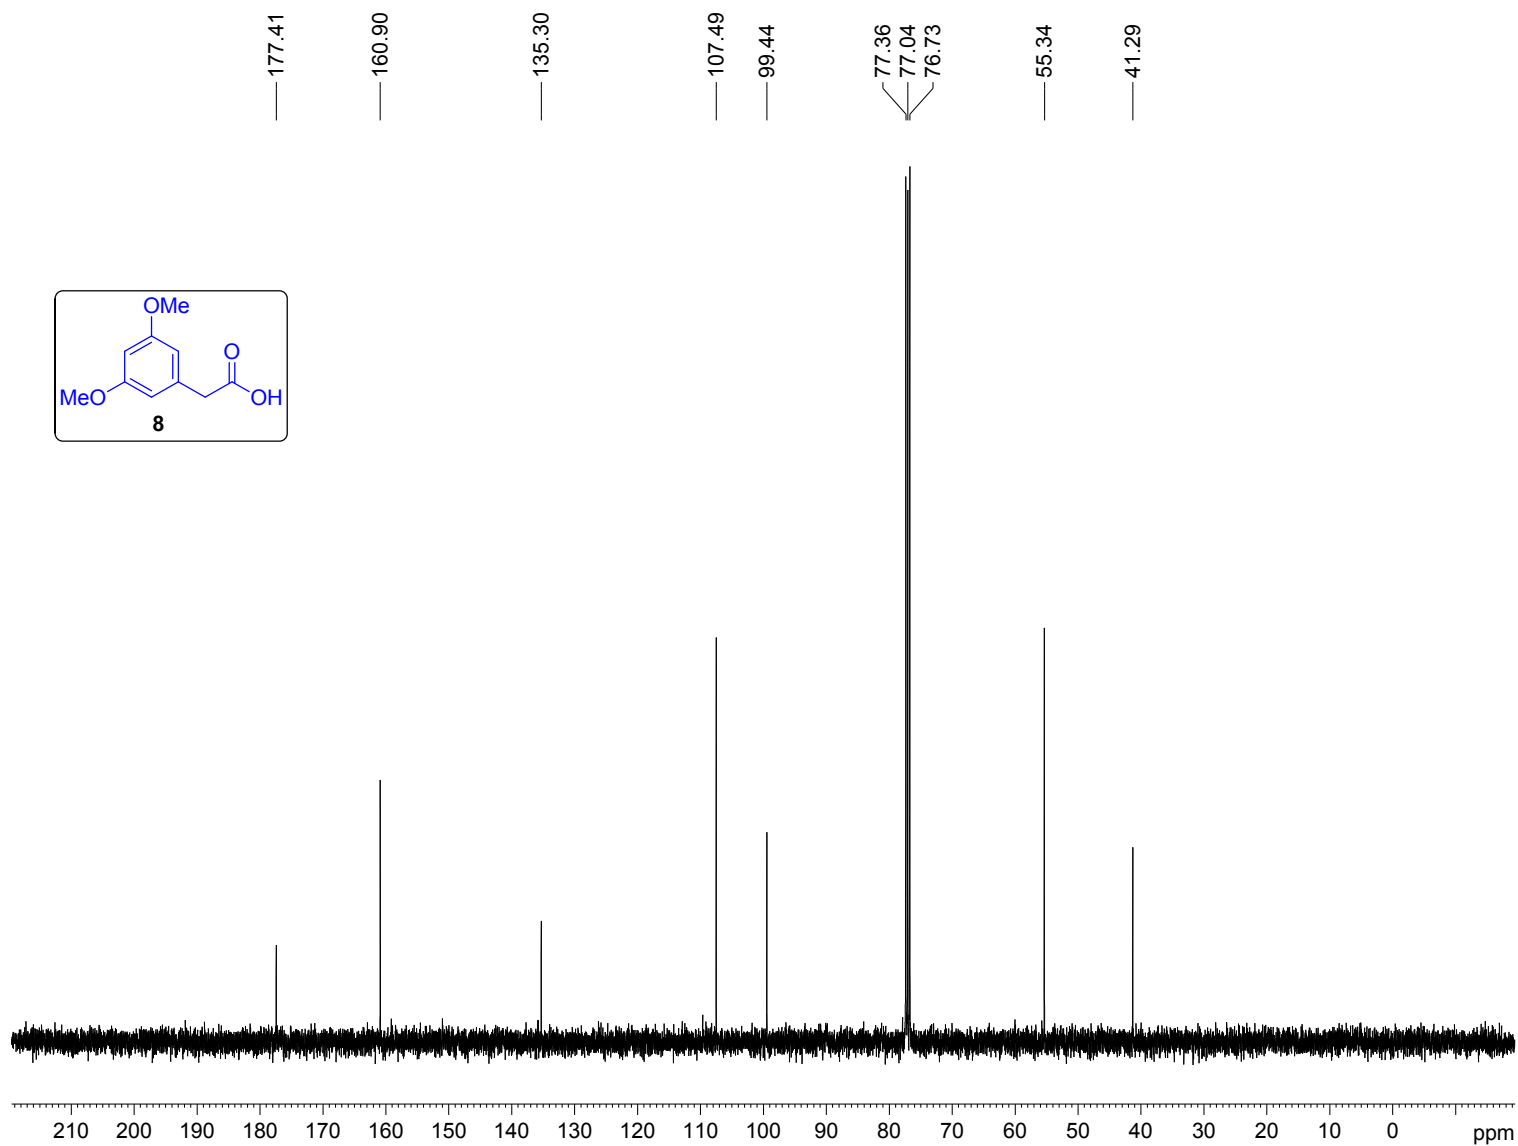

PYR-371 BEK  
26/01/2013  
PROTON CDC13

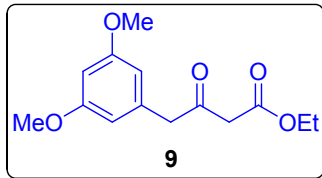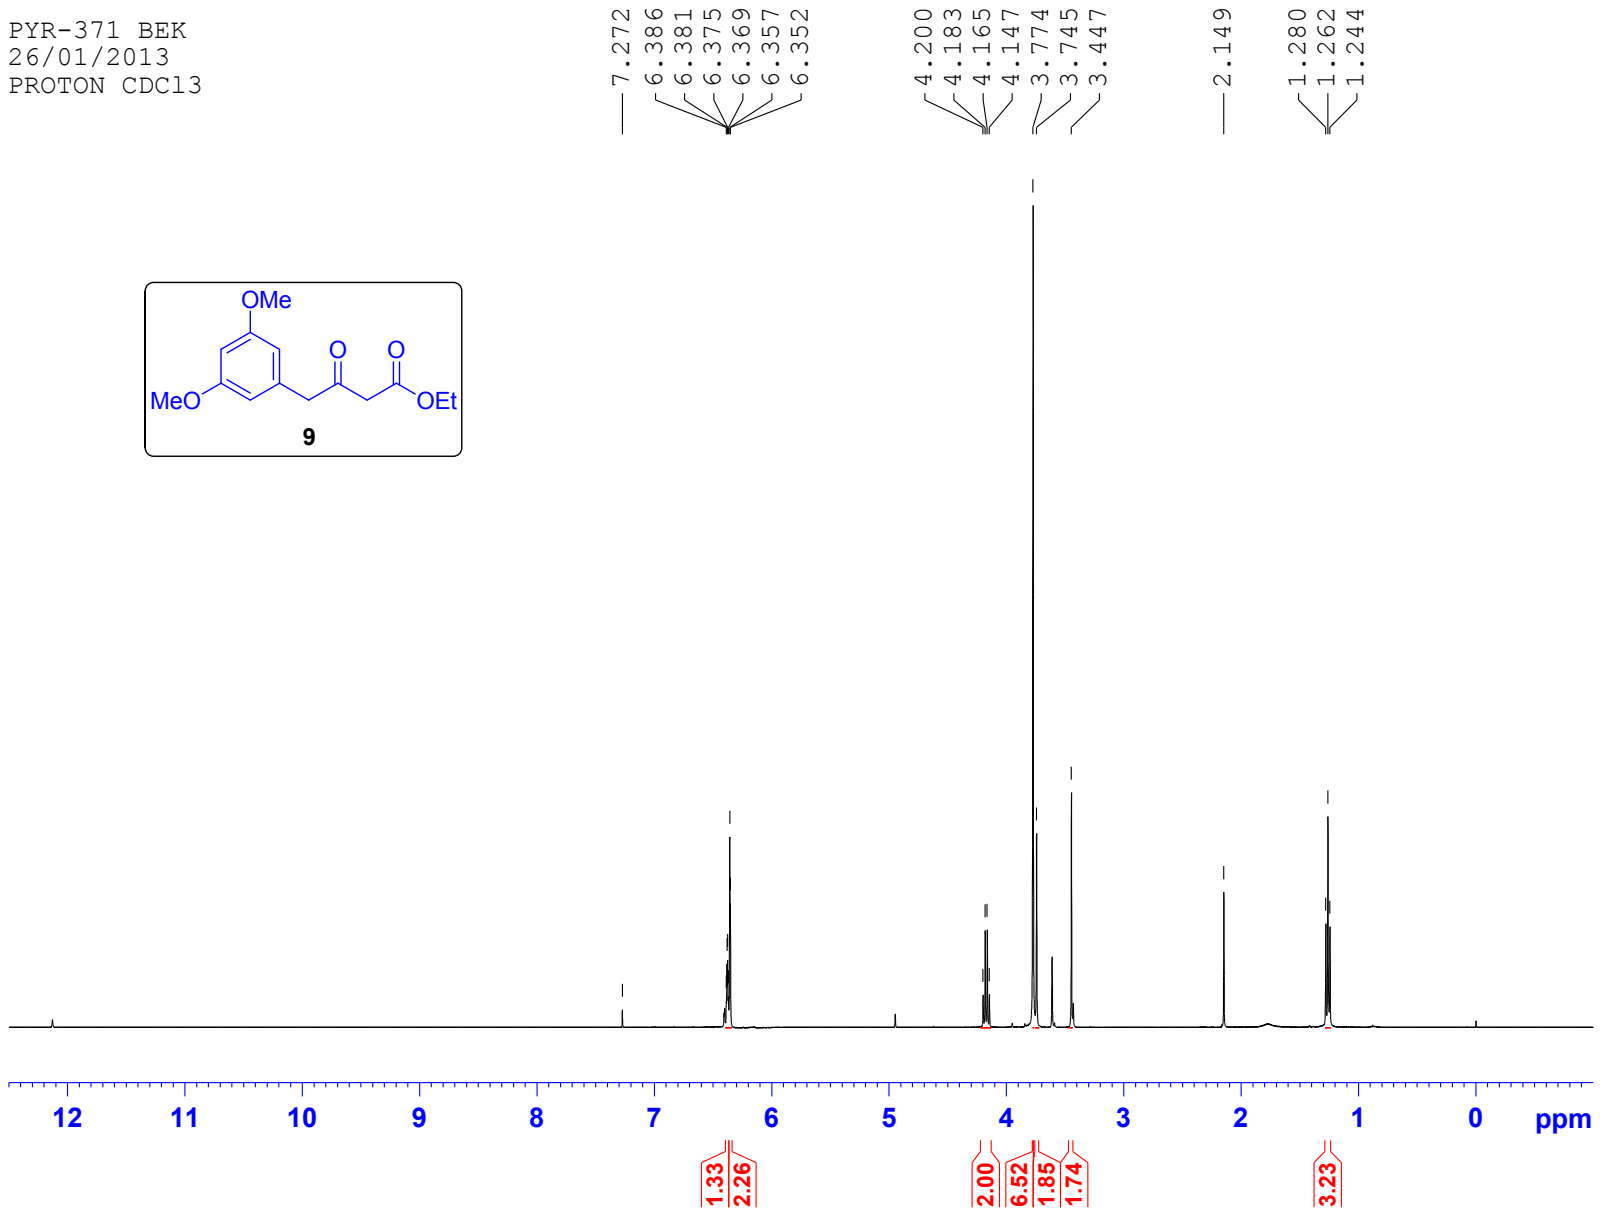

PYR-371 BEK  
C13CPD CDCl3

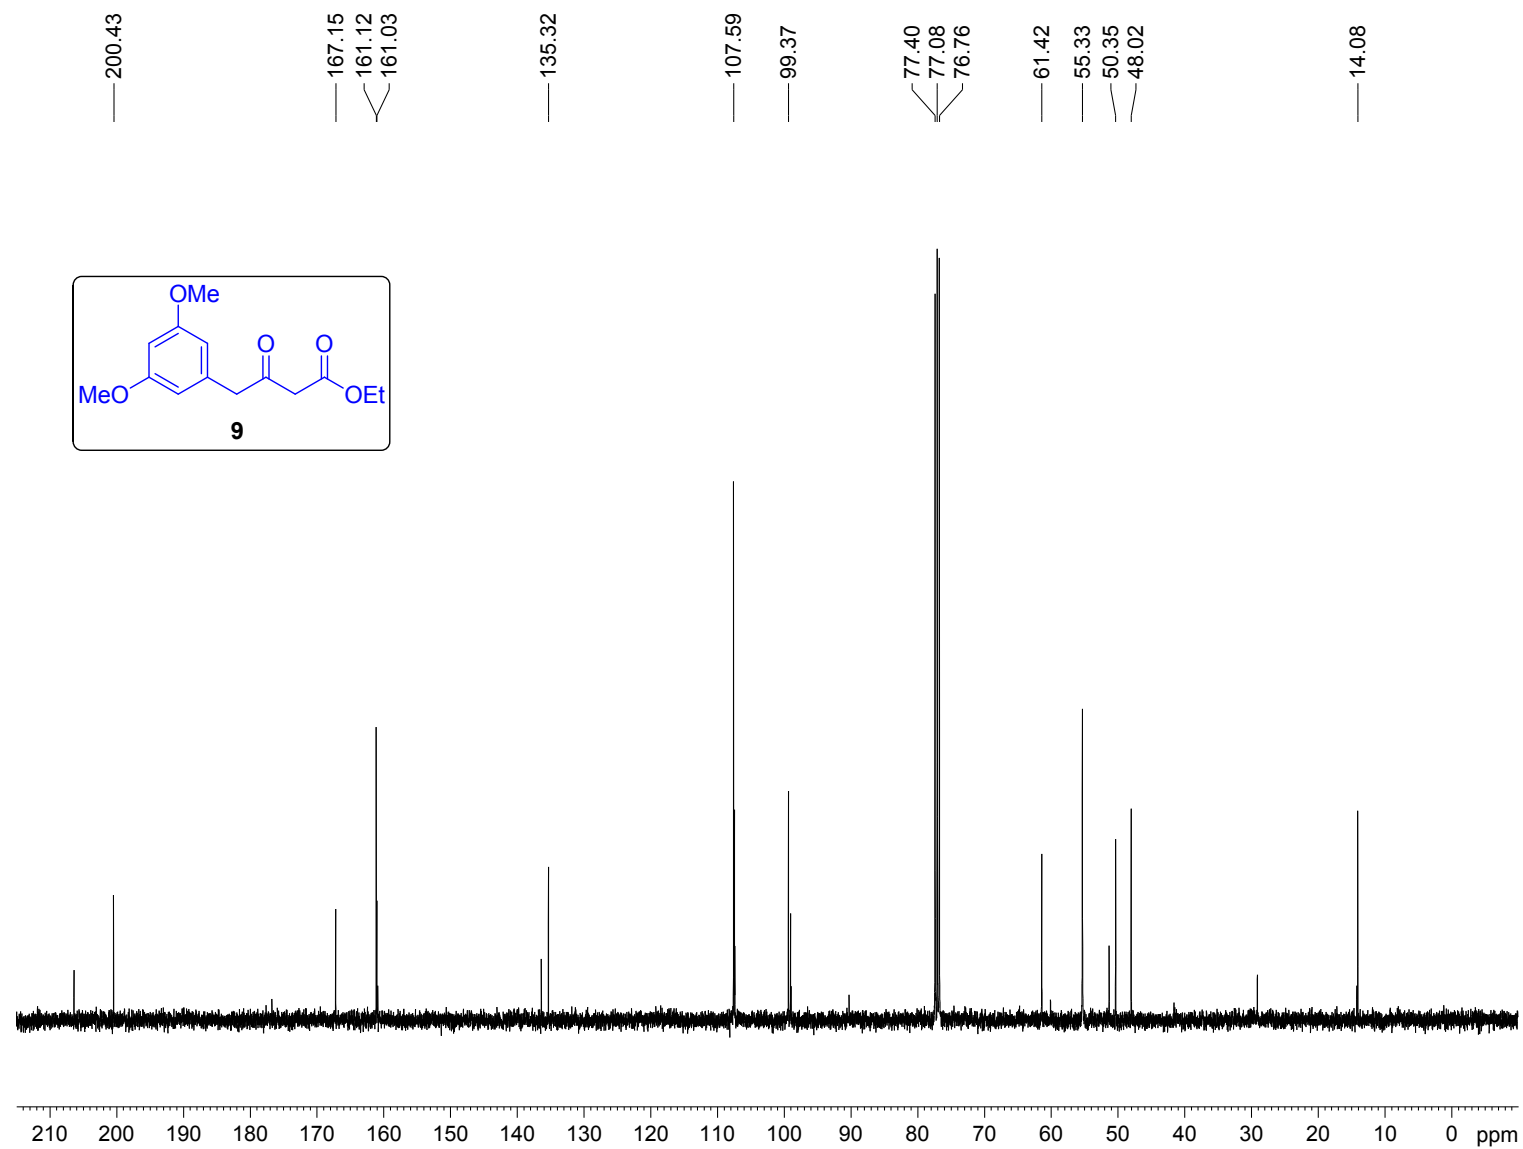

PYR-DHNP-SC  
27/03/2014  
PROTON CDC13

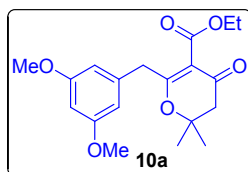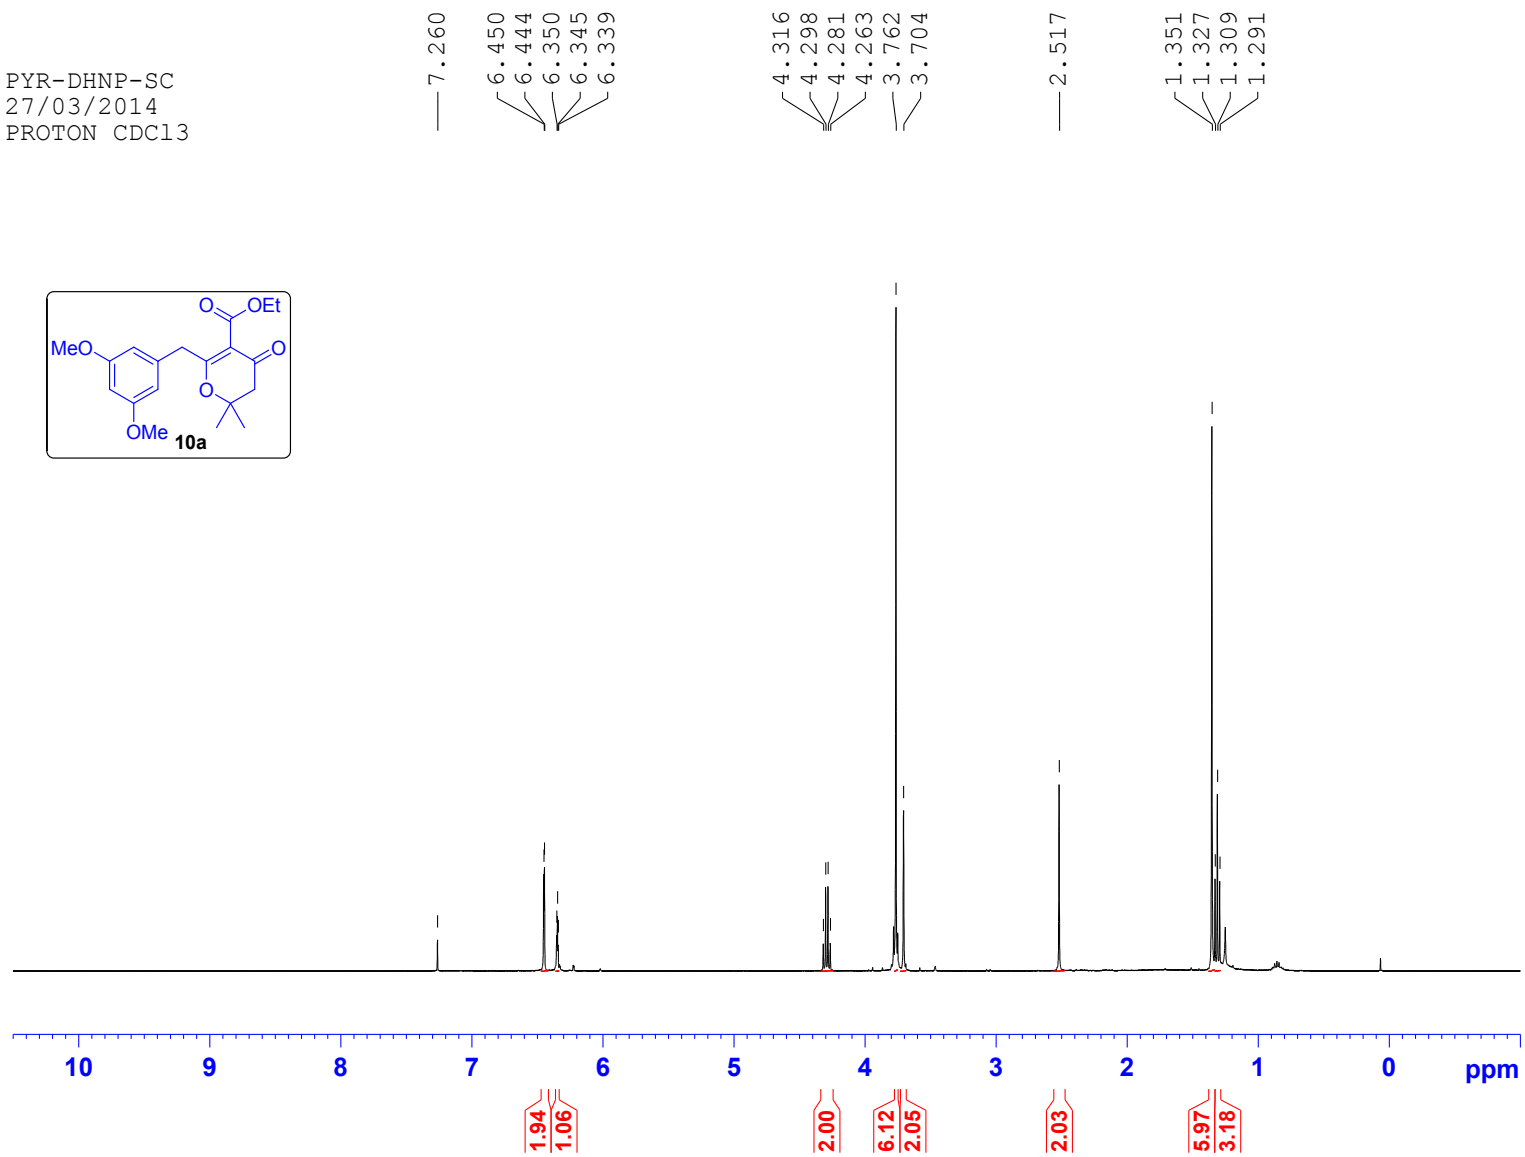



PYR-DHNP-SC  
27/03/2014  
C13CPD CDC13

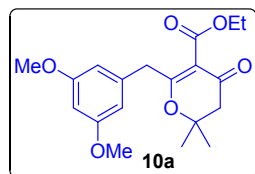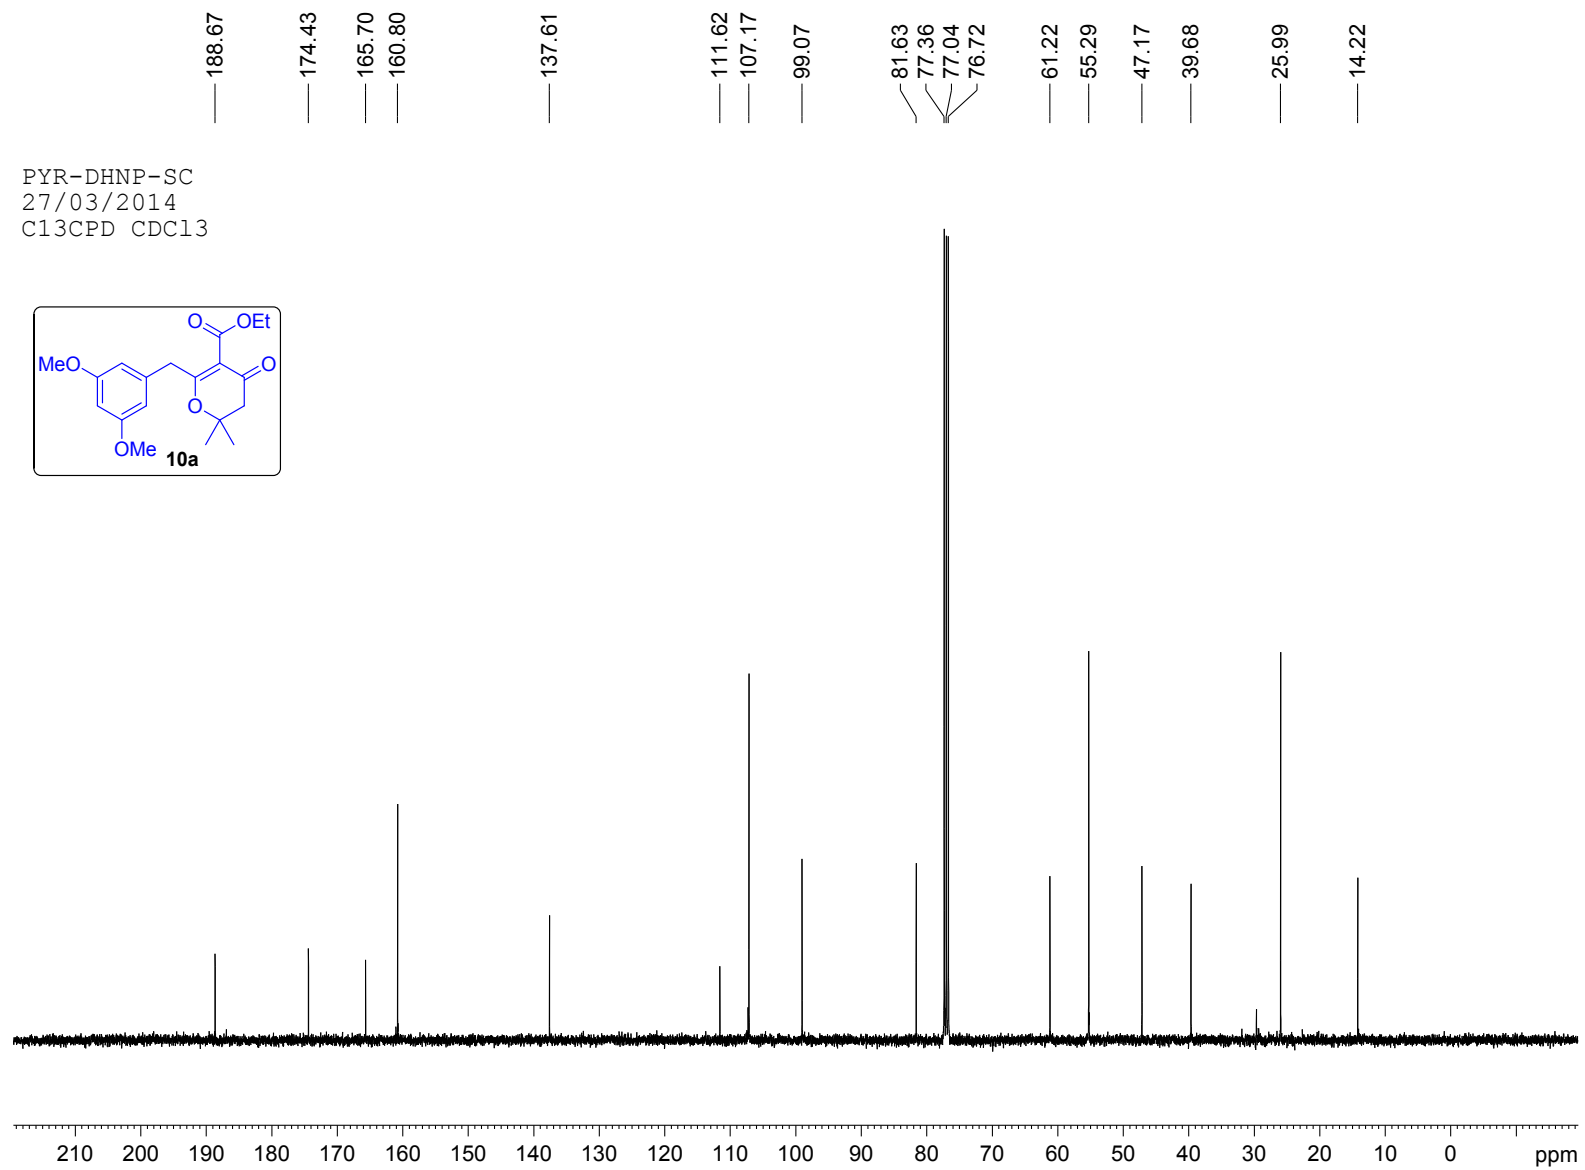

PYR-DHNP-TC-trans  
26/03/2014  
PROTON CDC13

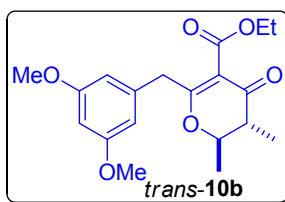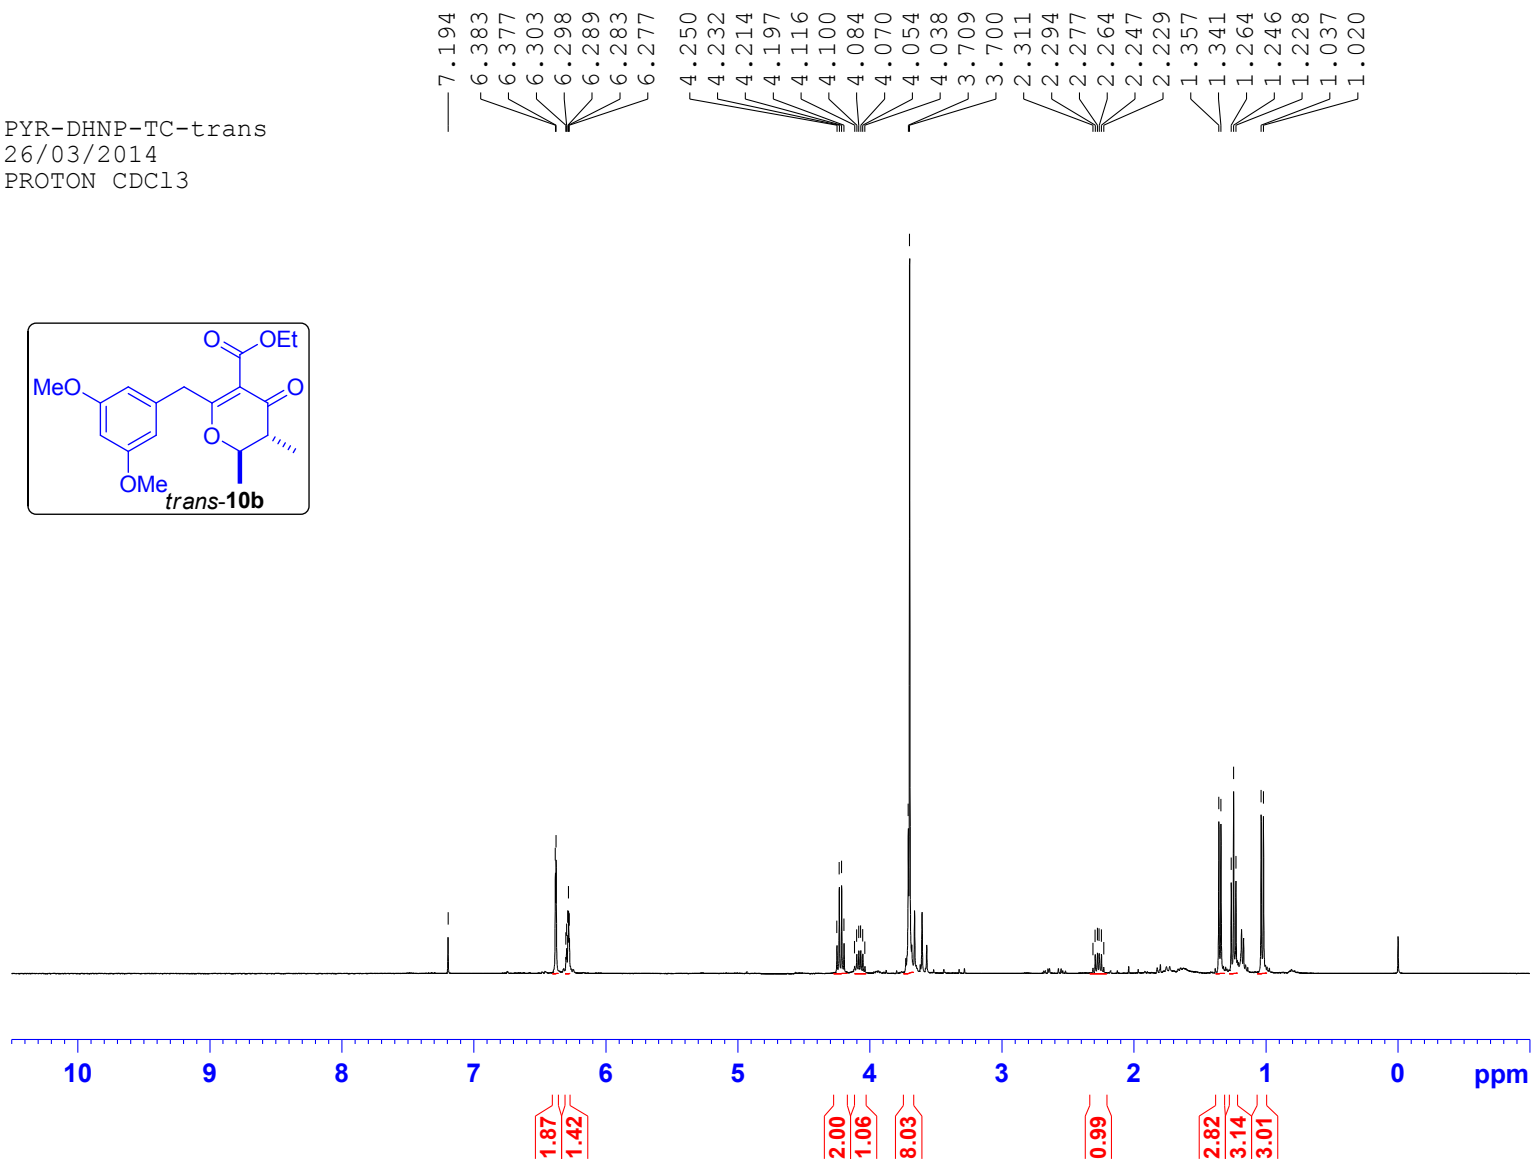

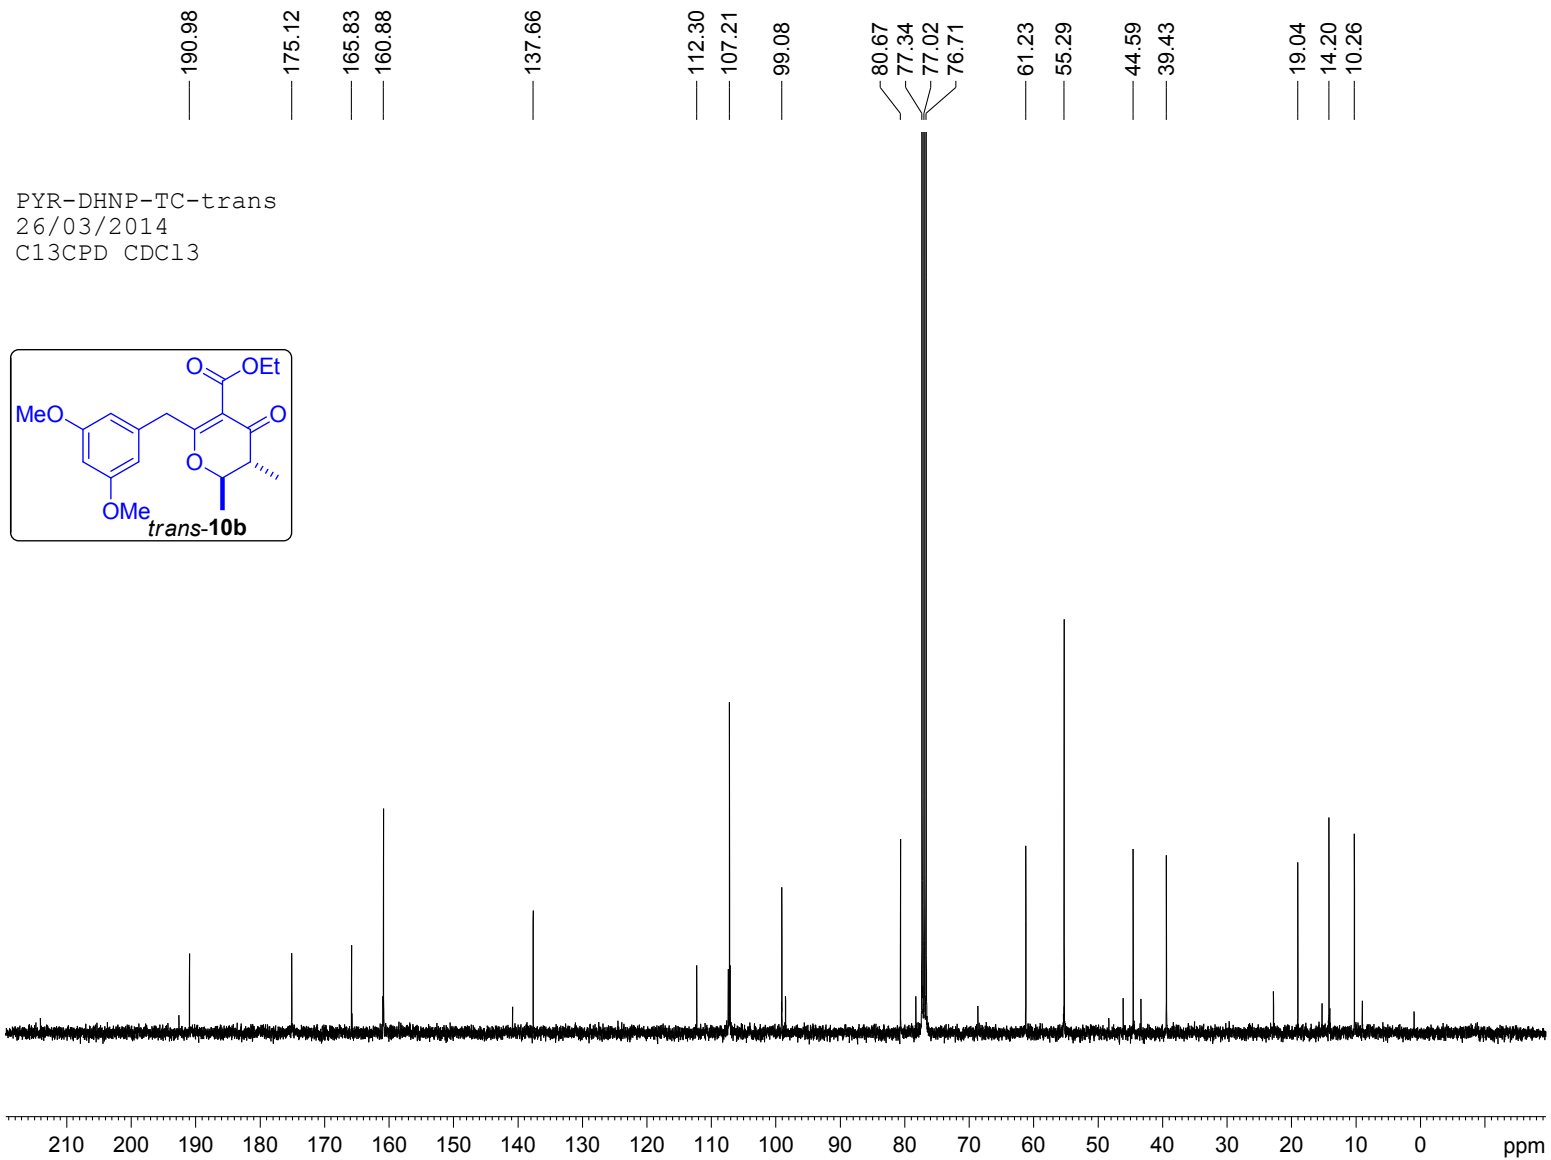

PYR-DHNP-TC-trans  
26/03/2014  
C13DEPT135 CDCl3

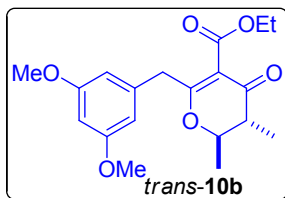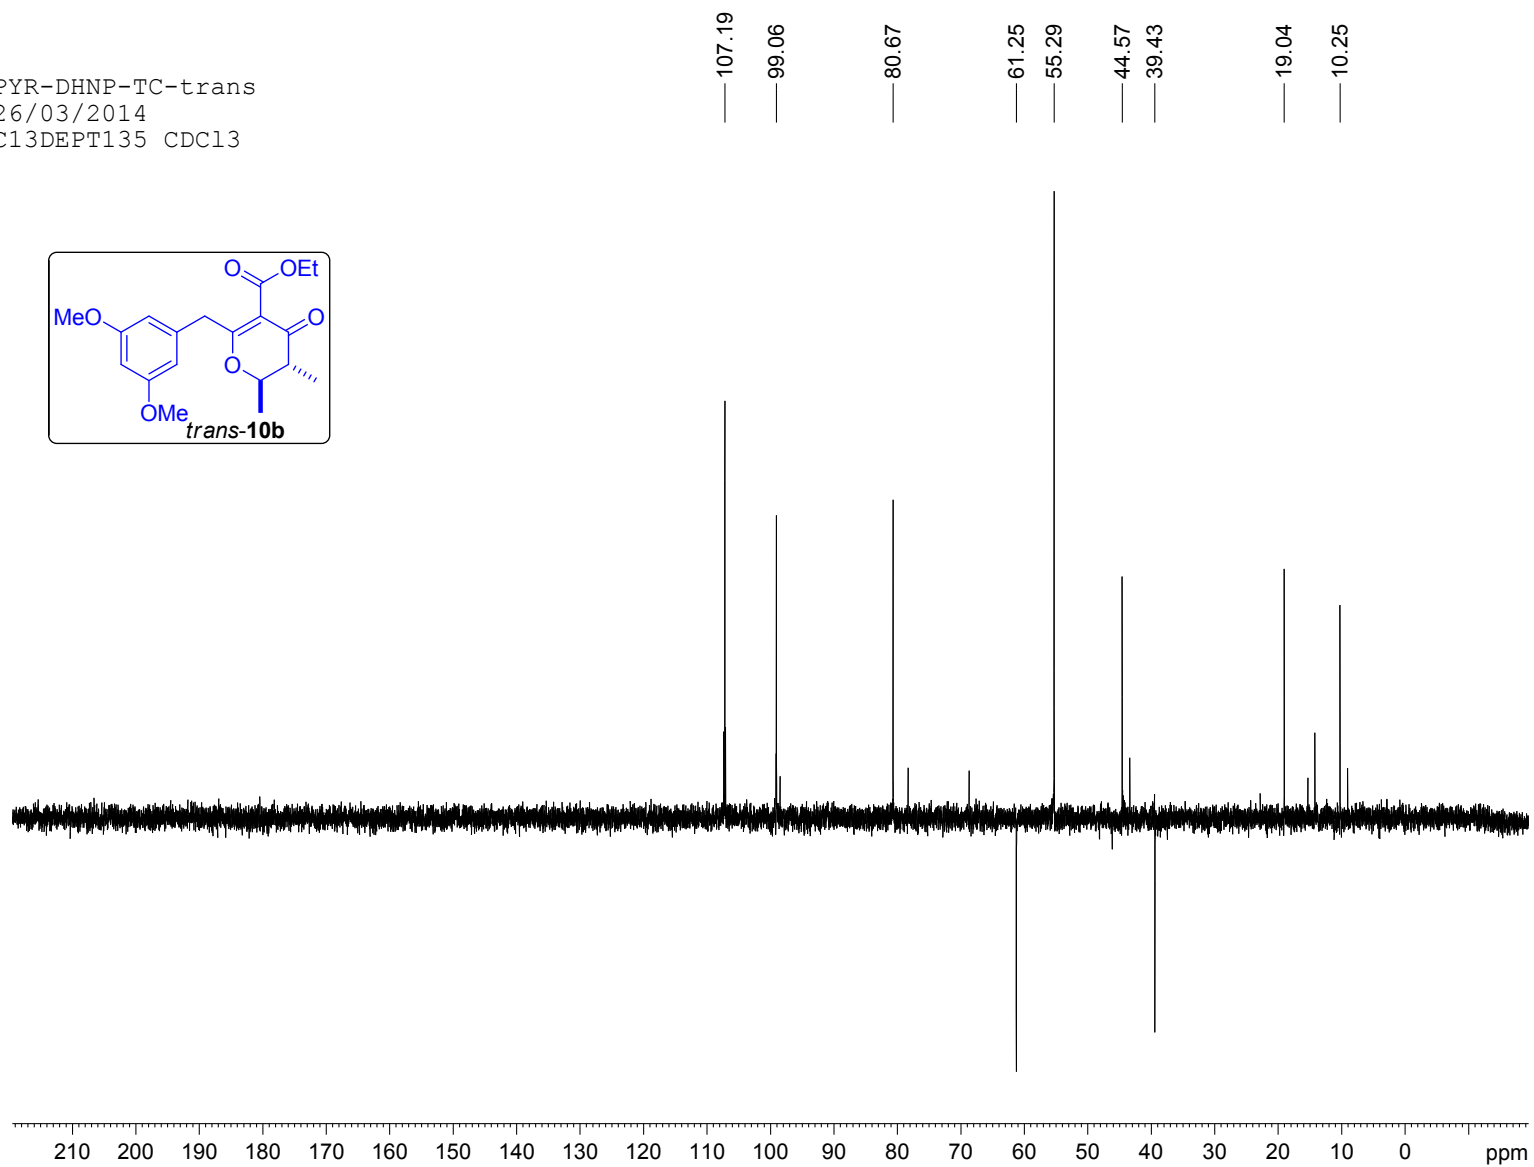

PYR-DHNP-TC cis  
28/03/2014  
PROTON CDC13

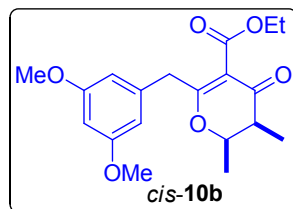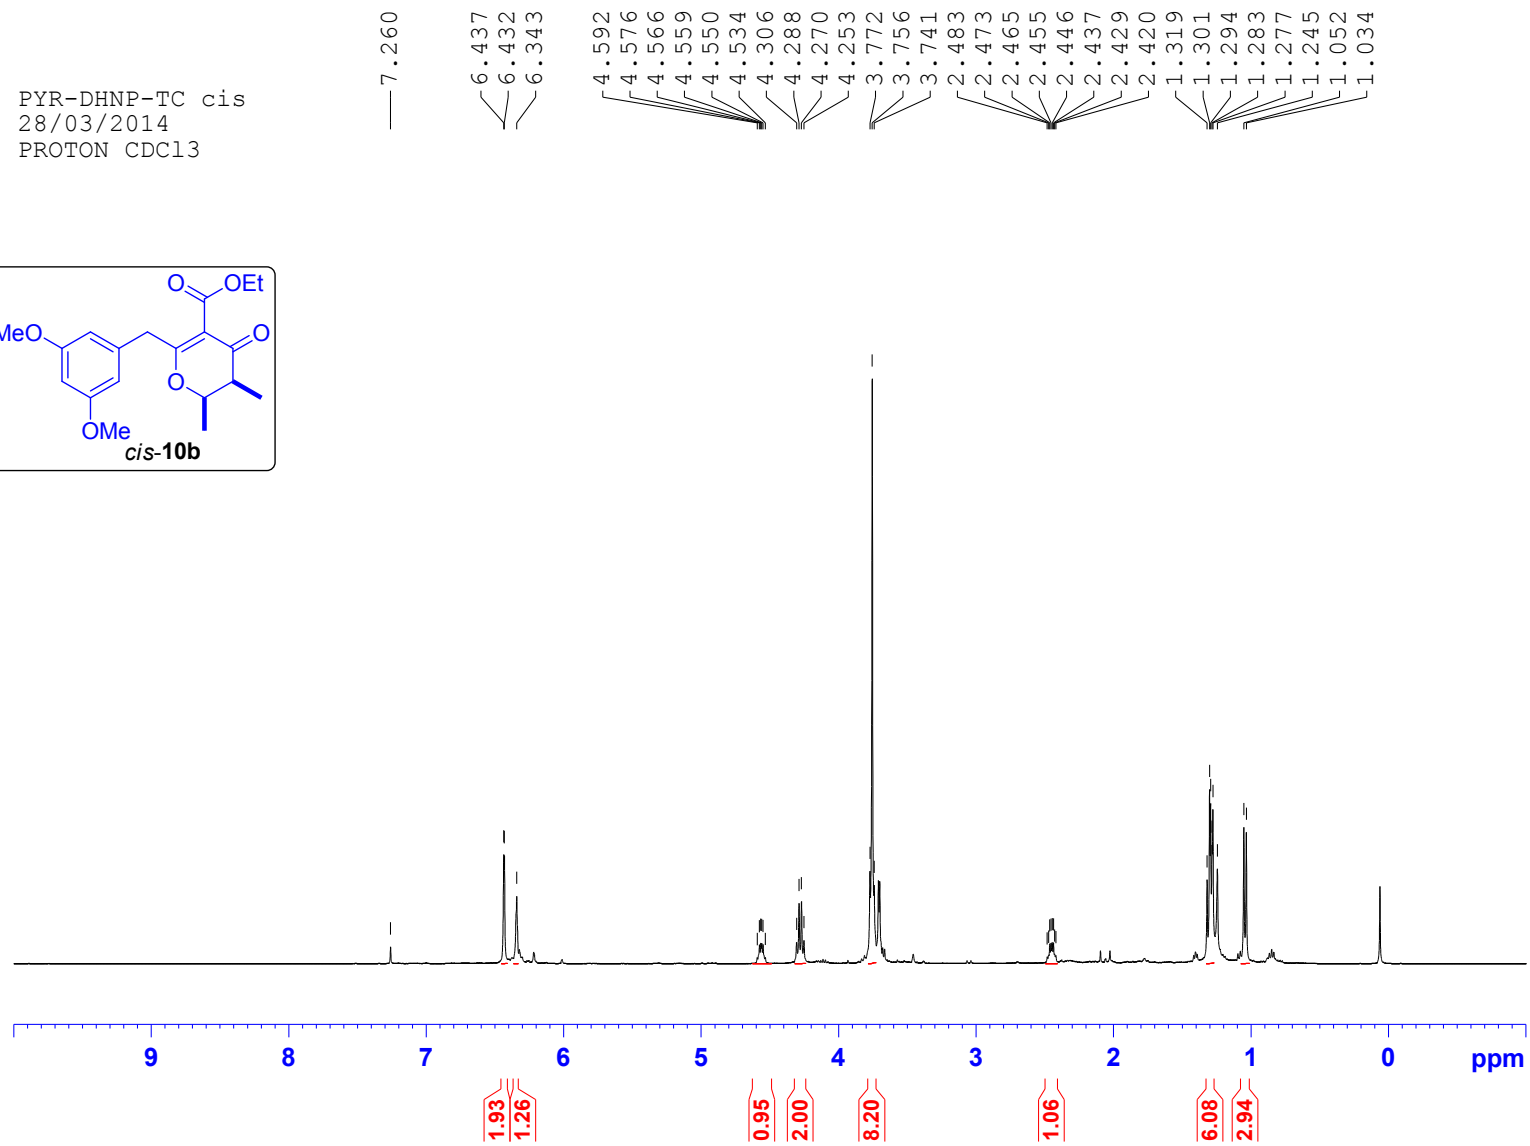

191.72  
174.20  
164.77  
159.85  
136.64  
110.64  
106.05  
98.08  
77.28  
76.37  
76.05  
75.73  
60.25  
54.27  
42.34  
38.38  
14.28  
13.20  
8.04

PYR-DHNP-TC cis  
28/03/2014  
C13CPD CDC13

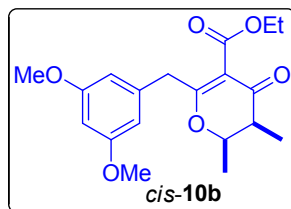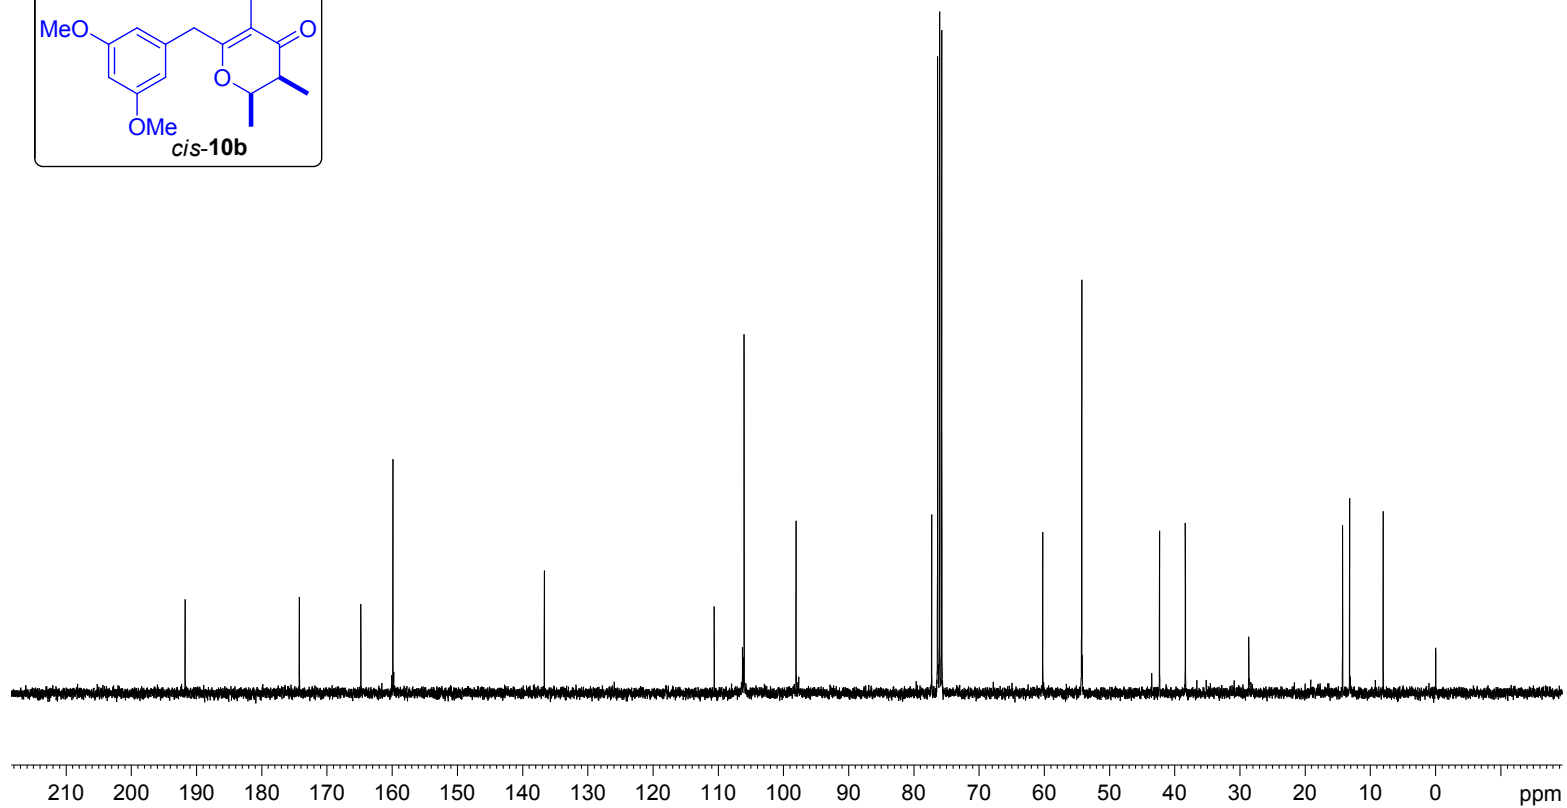

PYR-406 DMPAA-CRC  
PROTON CDCl3 06/01/2014

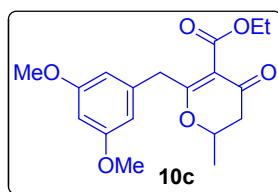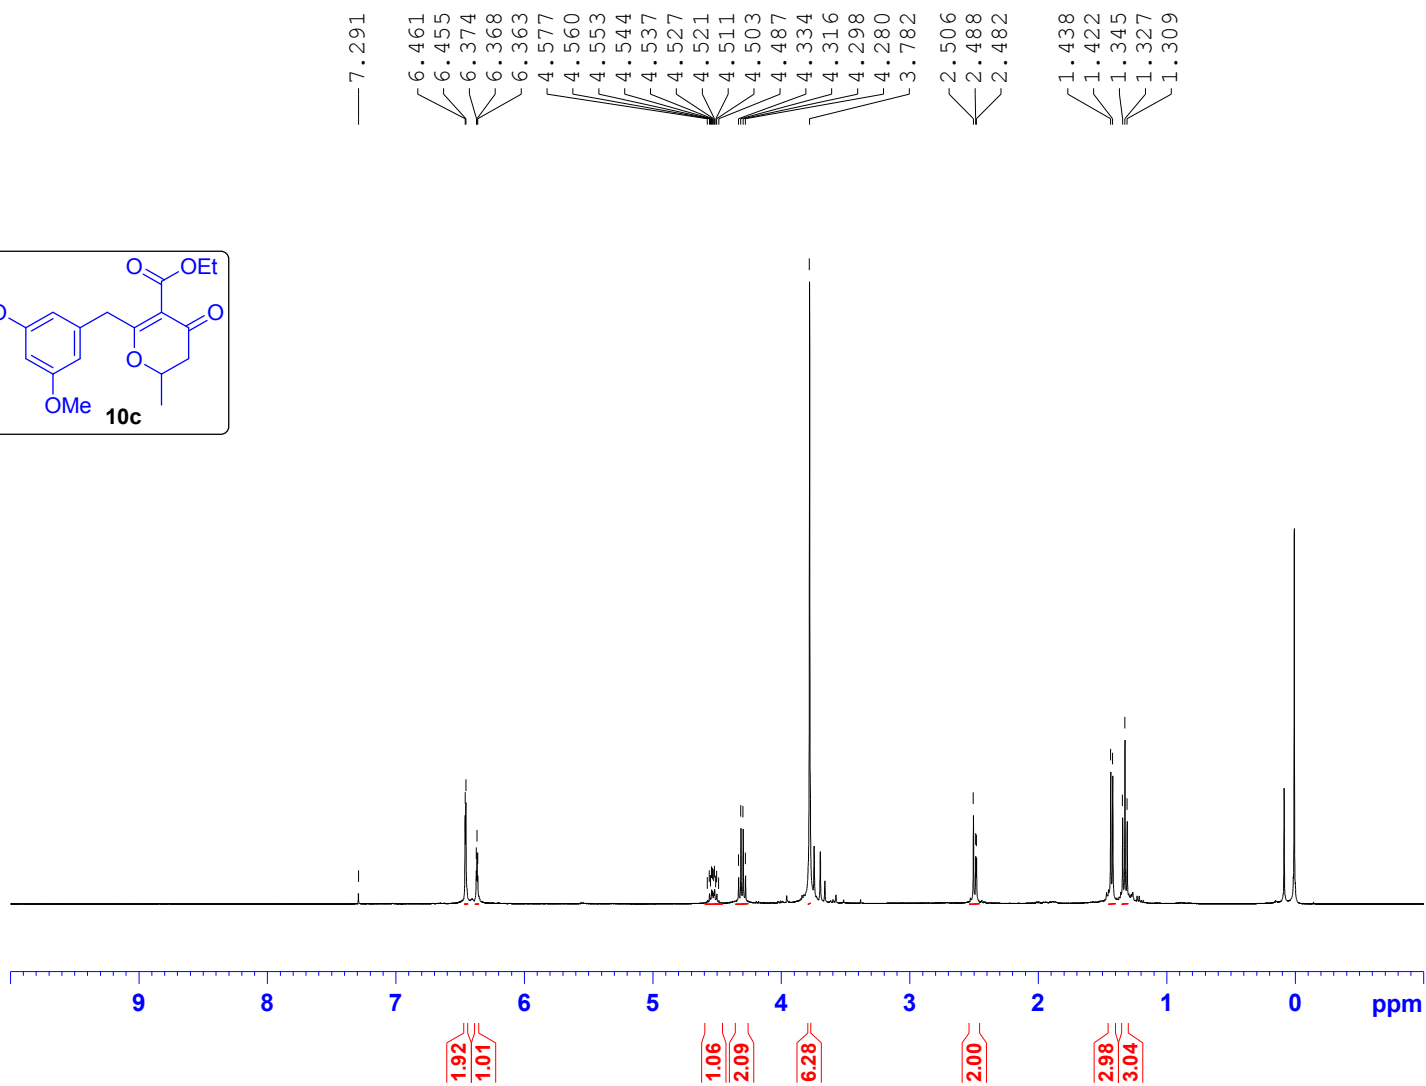

PYR-406 DMPAA-CRC  
C13CPD CDC13 06/01/2014

188.73  
176.16  
165.63  
160.85  
137.52  
113.03  
107.17  
99.00  
77.43  
77.11  
76.80  
75.95  
61.34  
55.28  
42.39  
39.49  
20.13  
14.19

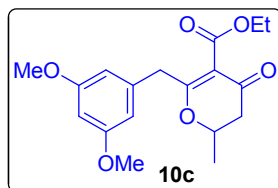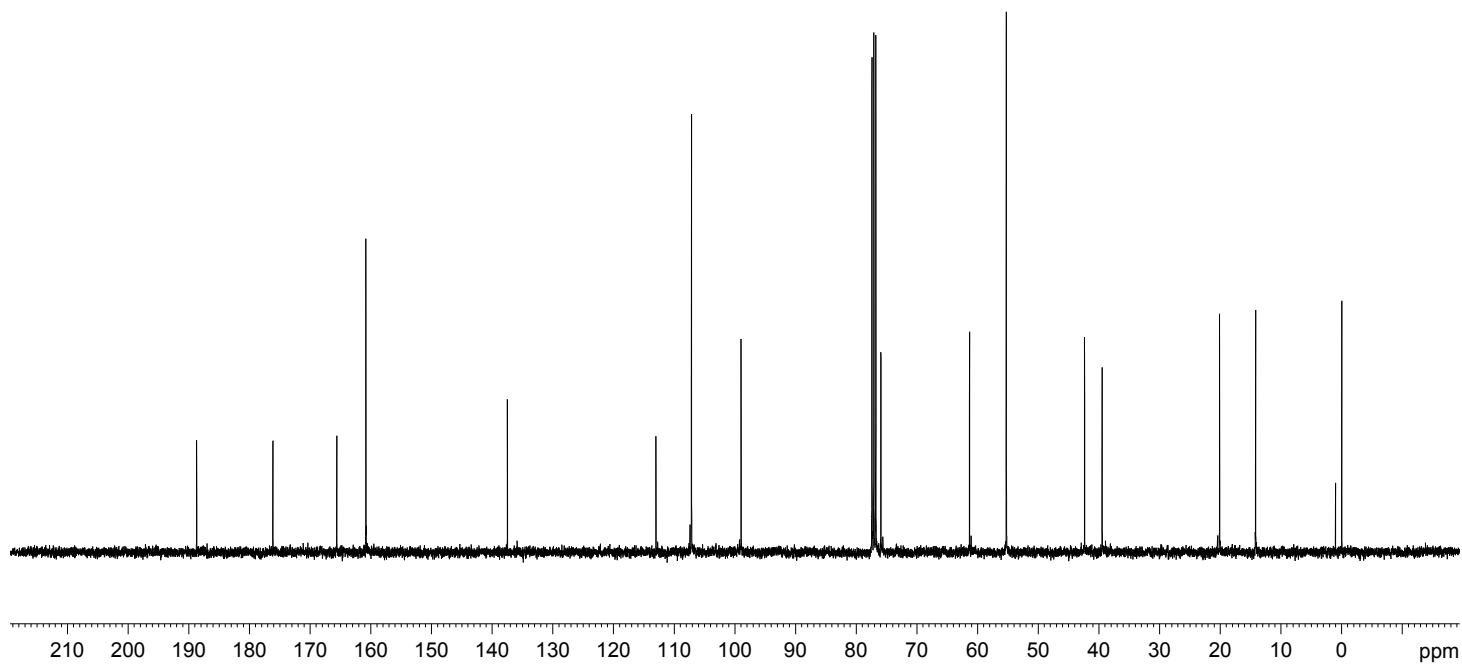



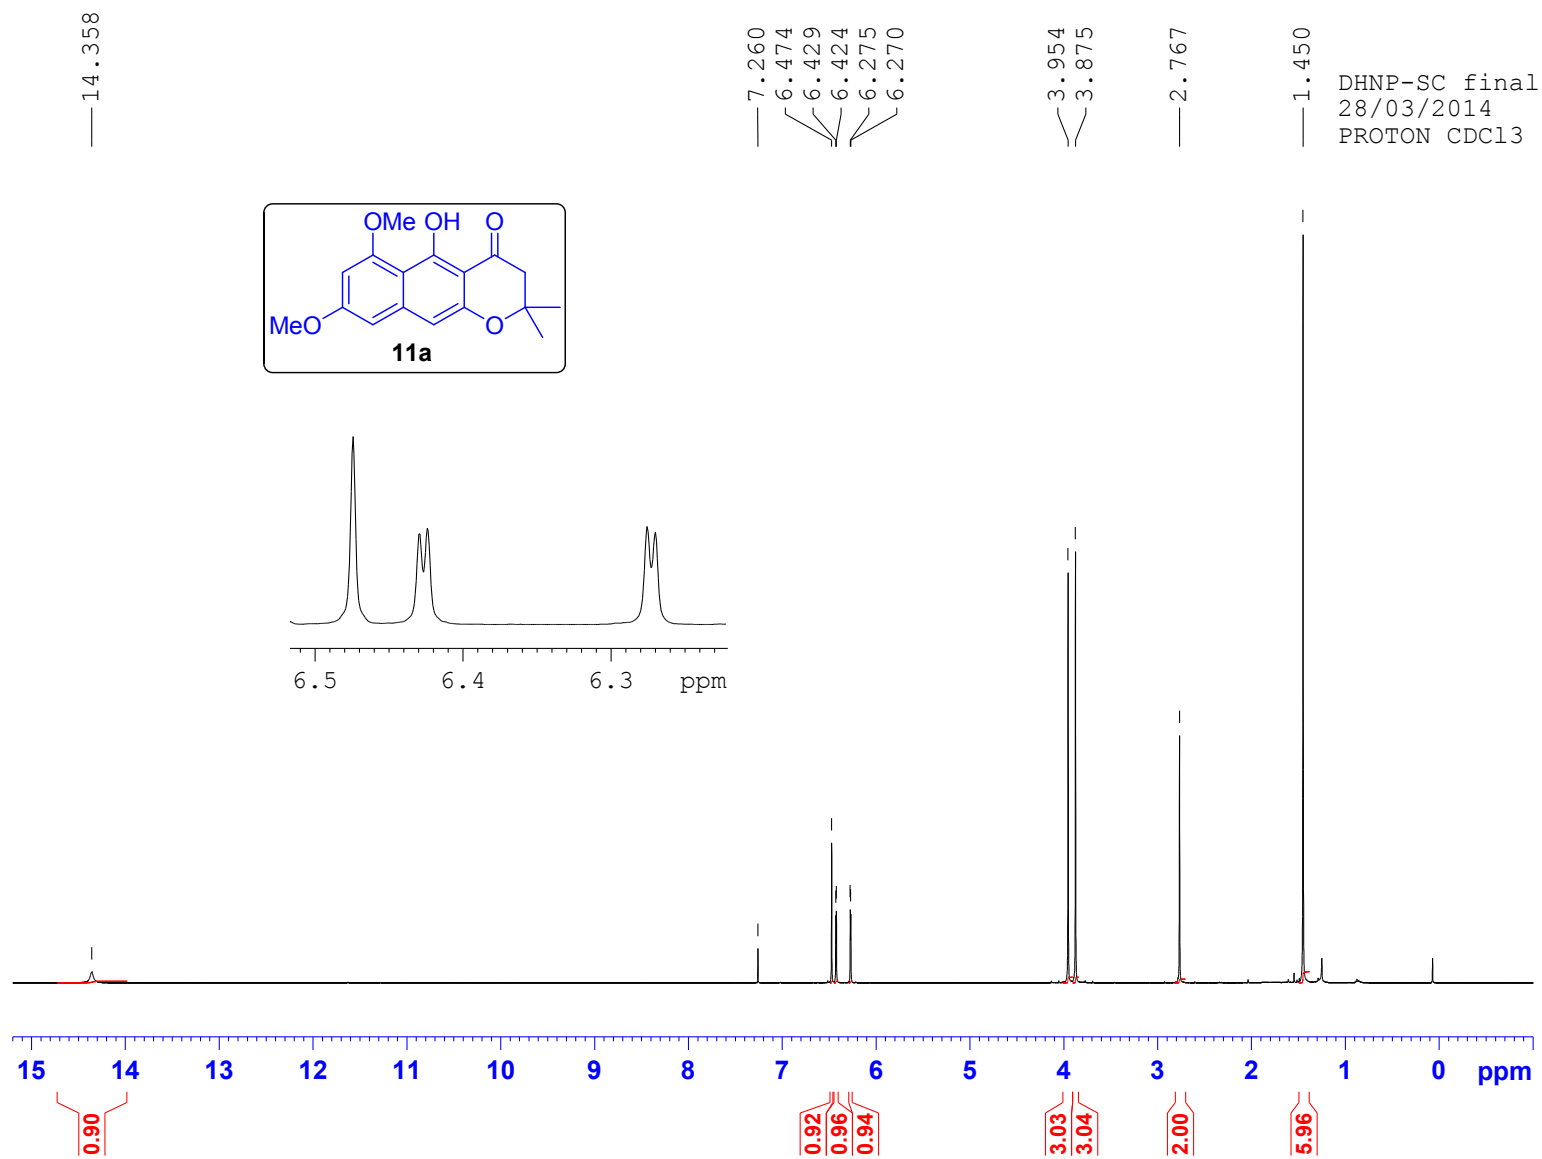

DHNP-SC final  
28/03/2014  
C13CPD CDC13

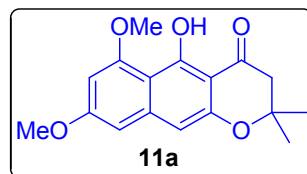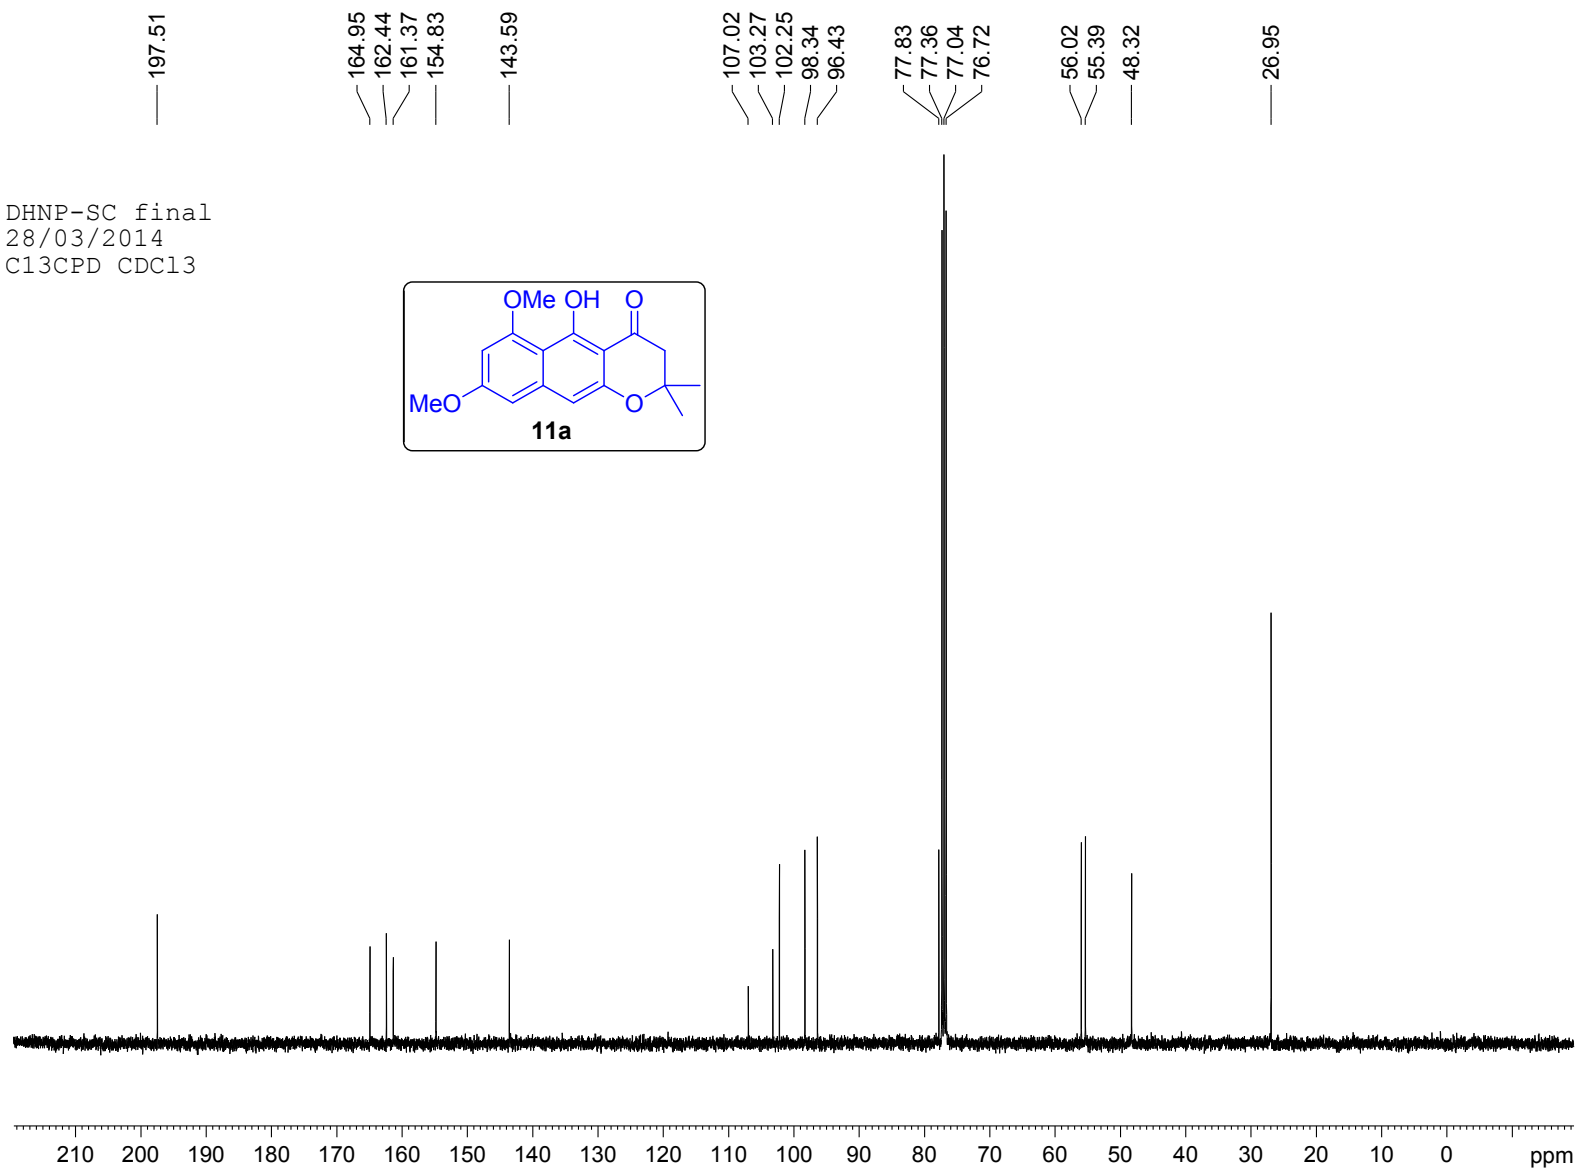

DHNP-SC final  
28/03/2014  
C13DEPT135 CDC13

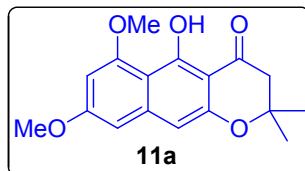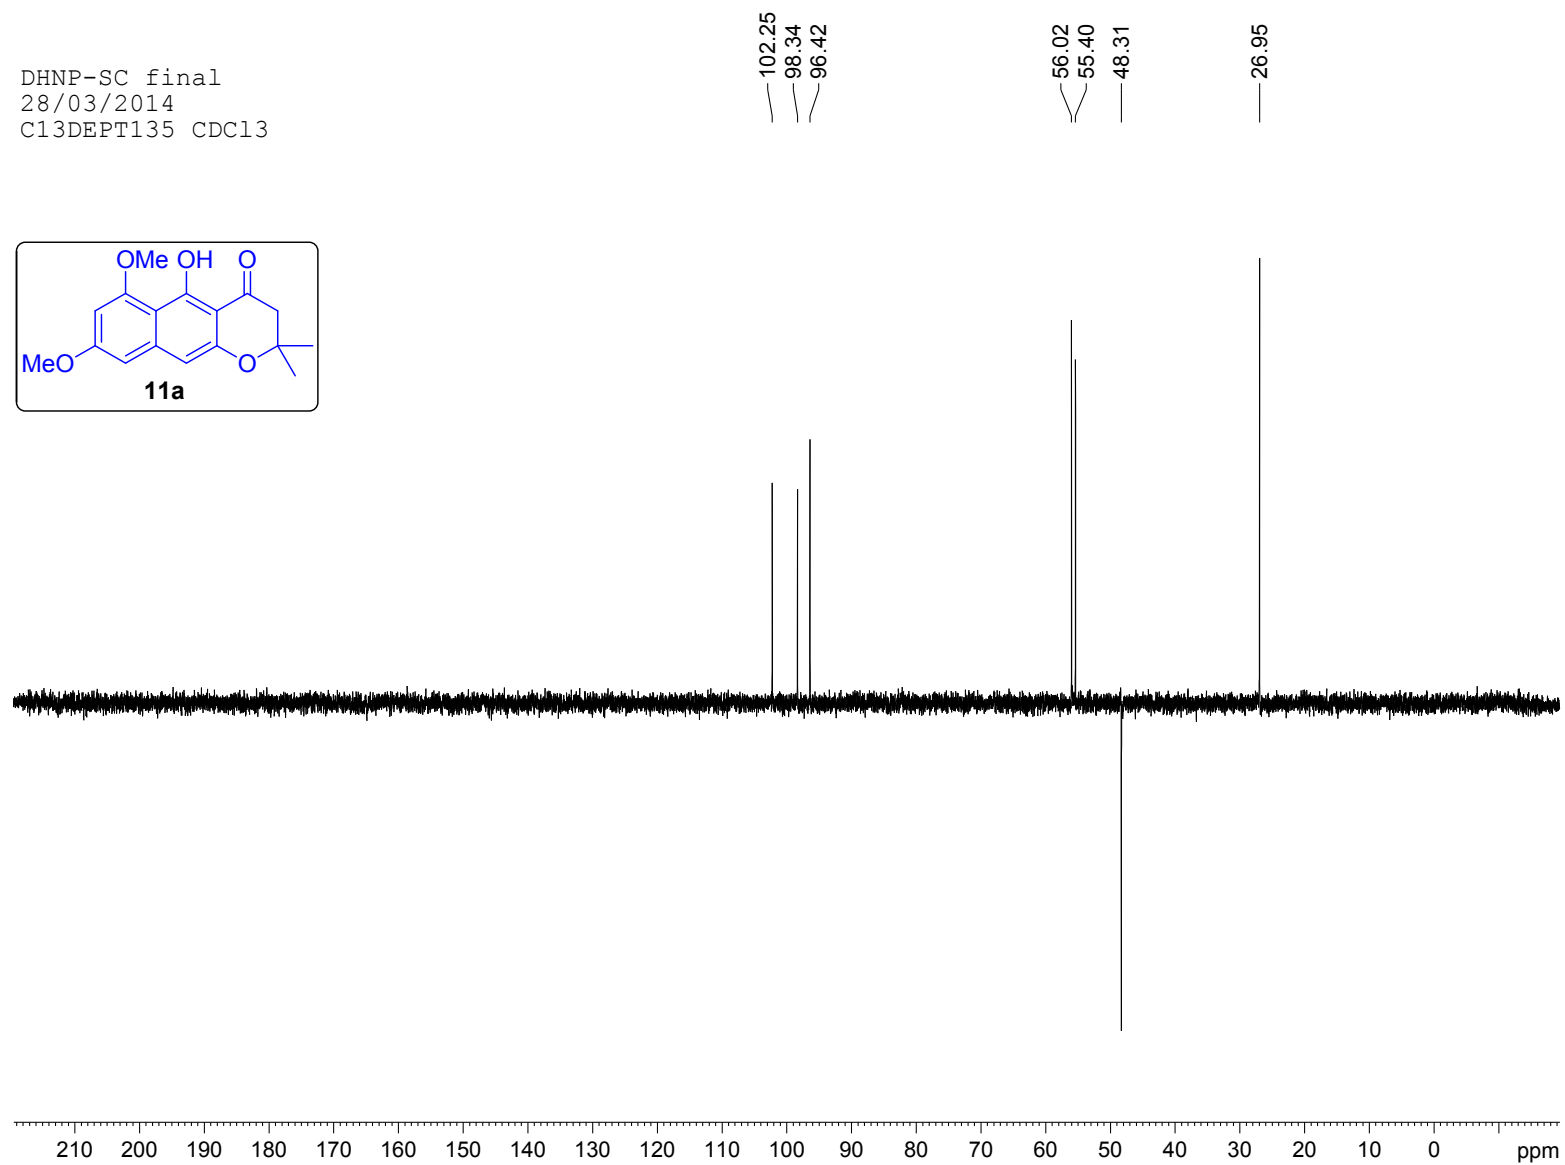

14.484  
14.406

DHNP-TC-C+T  
28/03/2014  
PROTON CDC13

7.260  
6.494  
6.485  
6.440  
6.435  
6.280  
6.275  
4.609  
4.600  
4.592  
4.584  
4.576  
4.568  
4.560  
4.551  
4.232  
4.217  
4.201  
4.191  
4.175  
4.159  
3.956  
3.881  
2.715  
2.707  
2.696  
2.689  
2.678  
2.670  
2.660  
2.652  
2.643  
2.634  
2.616  
1.509  
1.493

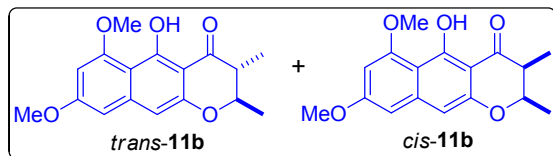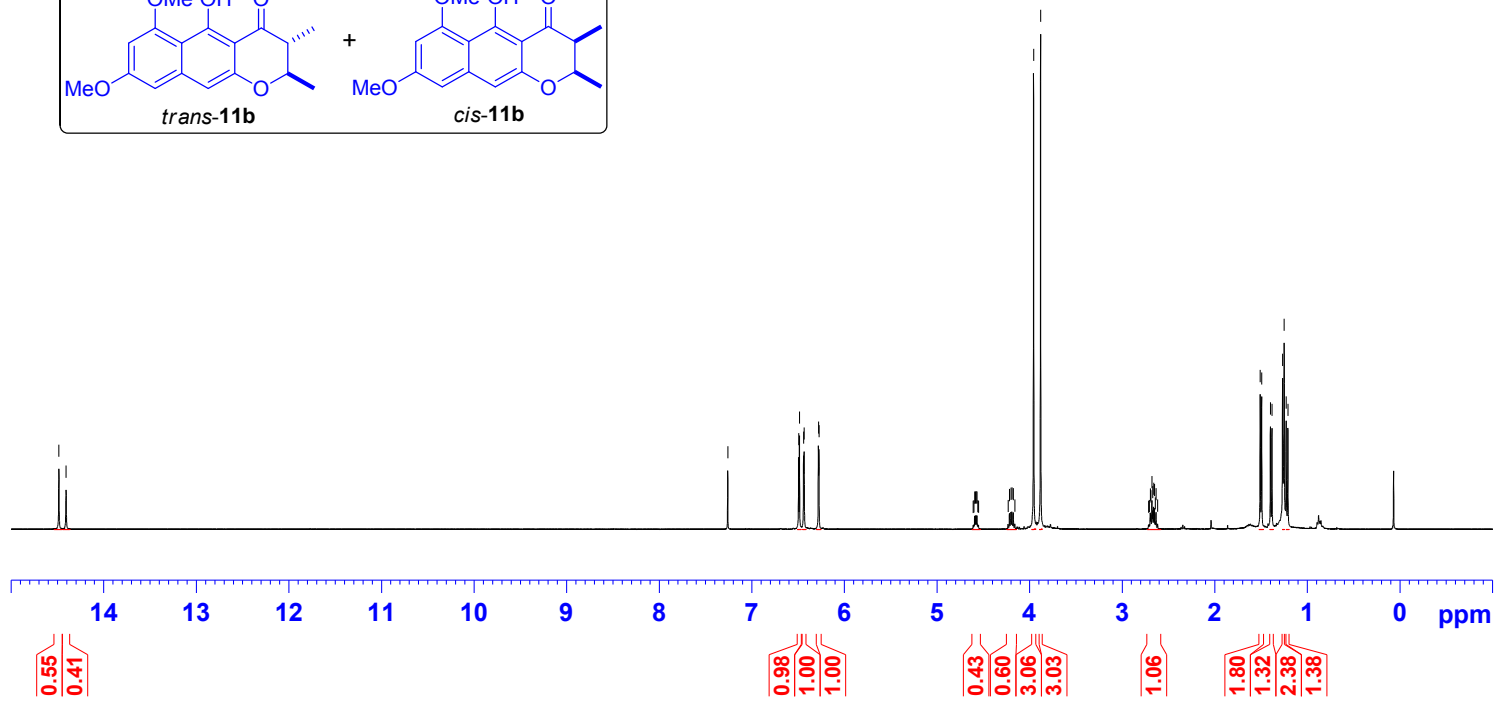

PYR-DHNP-TC-trans 02/05/2014  
PROTON CDC13

— 14.474

7.260  
6.486  
6.436  
6.281  
4.233  
4.218  
4.202  
4.191  
4.176  
4.160  
3.957  
3.881  
2.694  
2.676  
2.668  
2.659  
2.651  
2.642  
2.633  
2.616  
1.509  
1.494  
1.269  
1.253

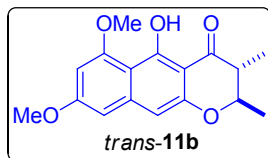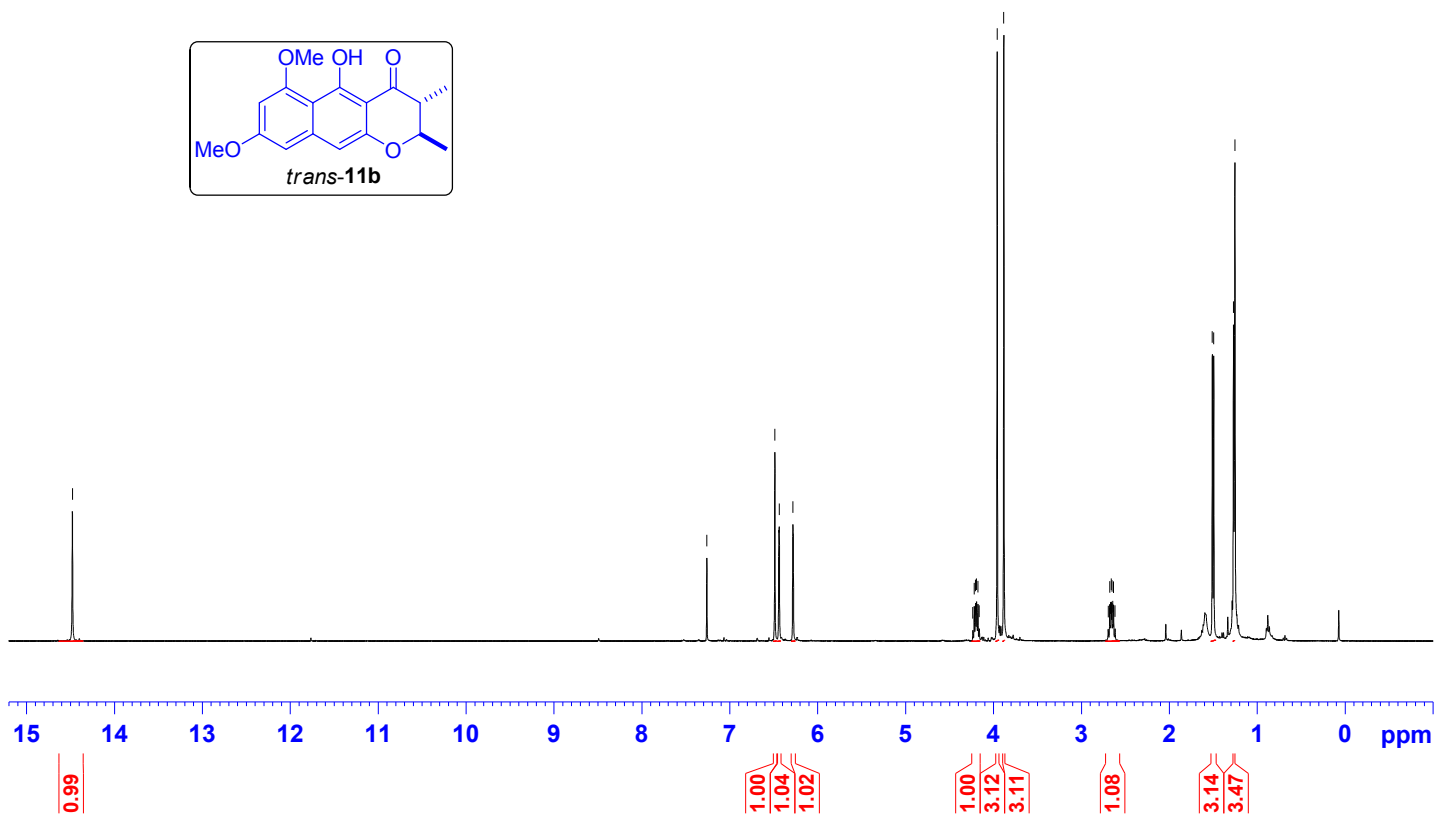

PYR-DHNP-TC-trans 02/05/2014  
C13CPD CDCl3

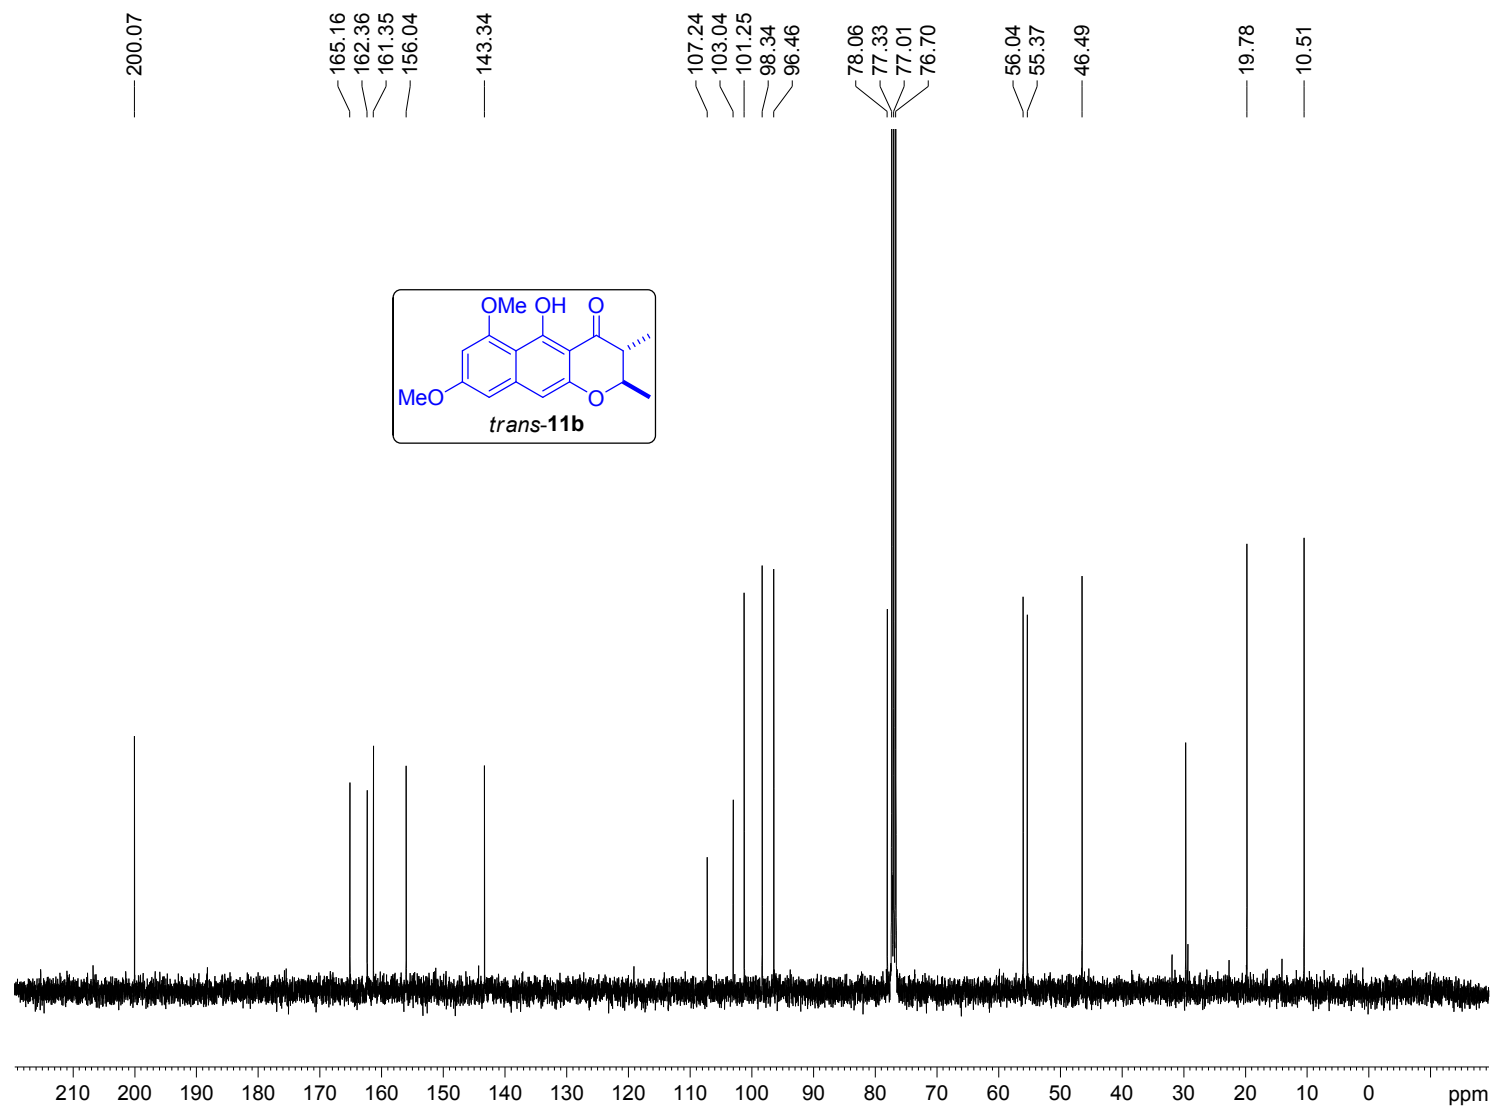

PYR-DHNP-TC-cis 02/05/2014  
PROTON CDC13

— 14.401

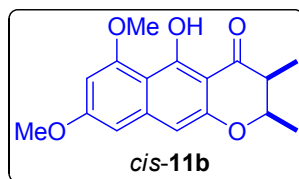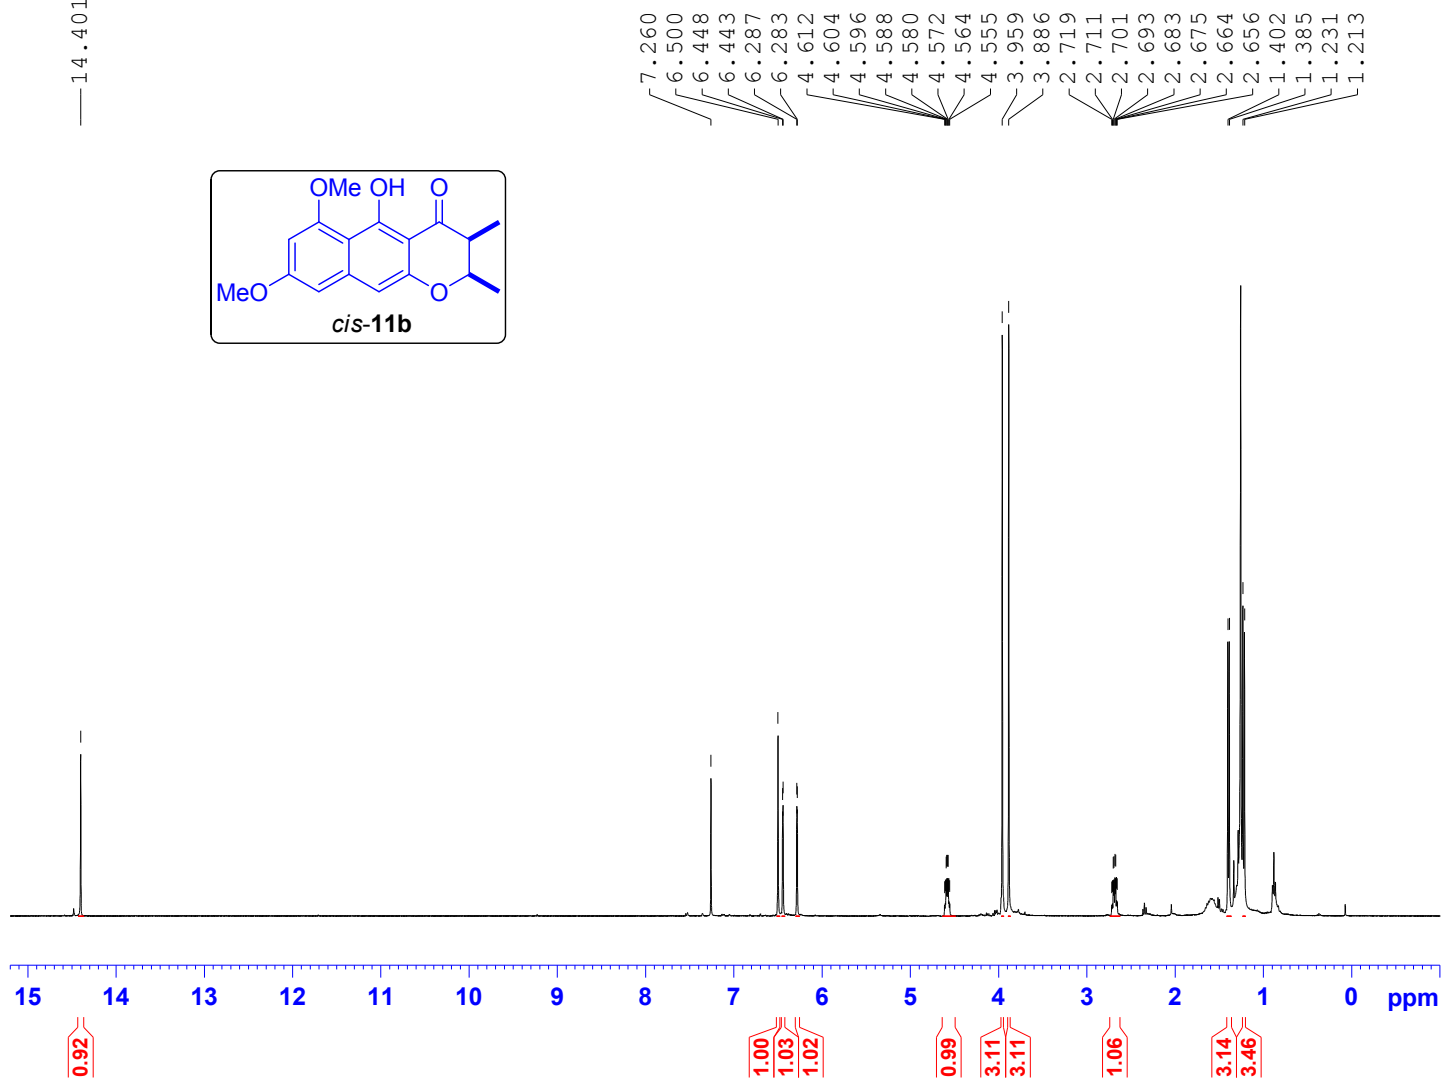

PYR-DHNP-TC-cis 02/05/2014  
C13CPD CDC13

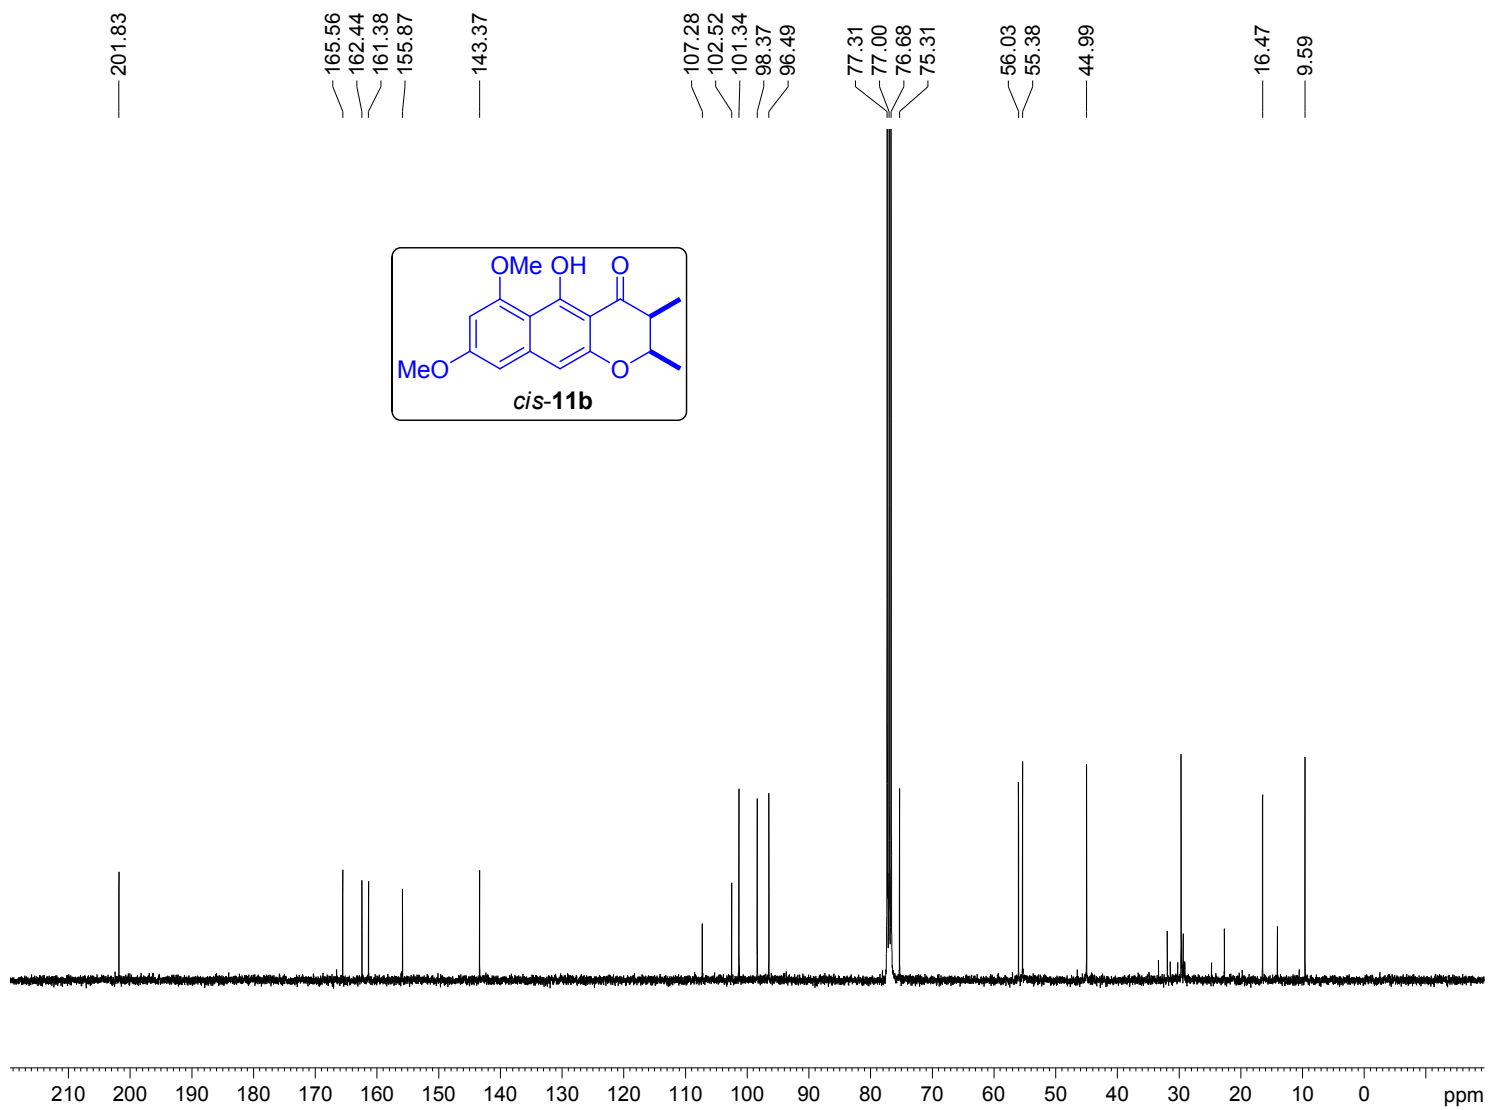



PYR-405 PPA  
PROTON CDCl3 04.01.2014

— 14.405

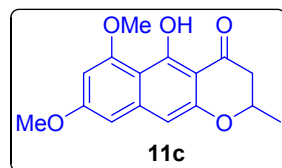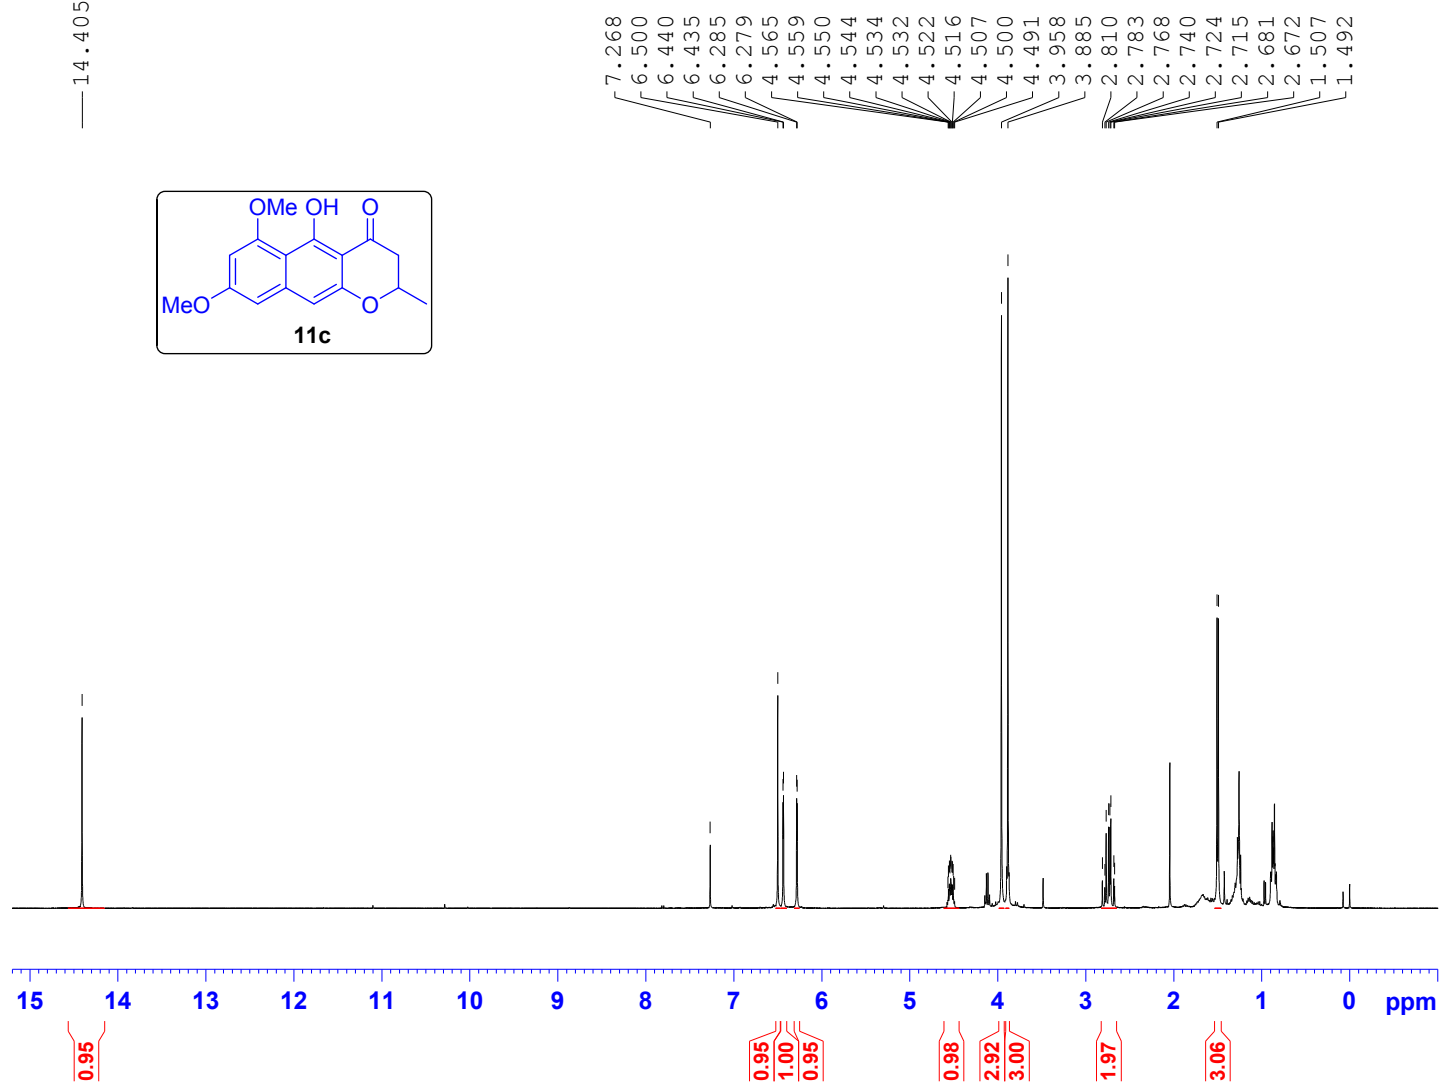

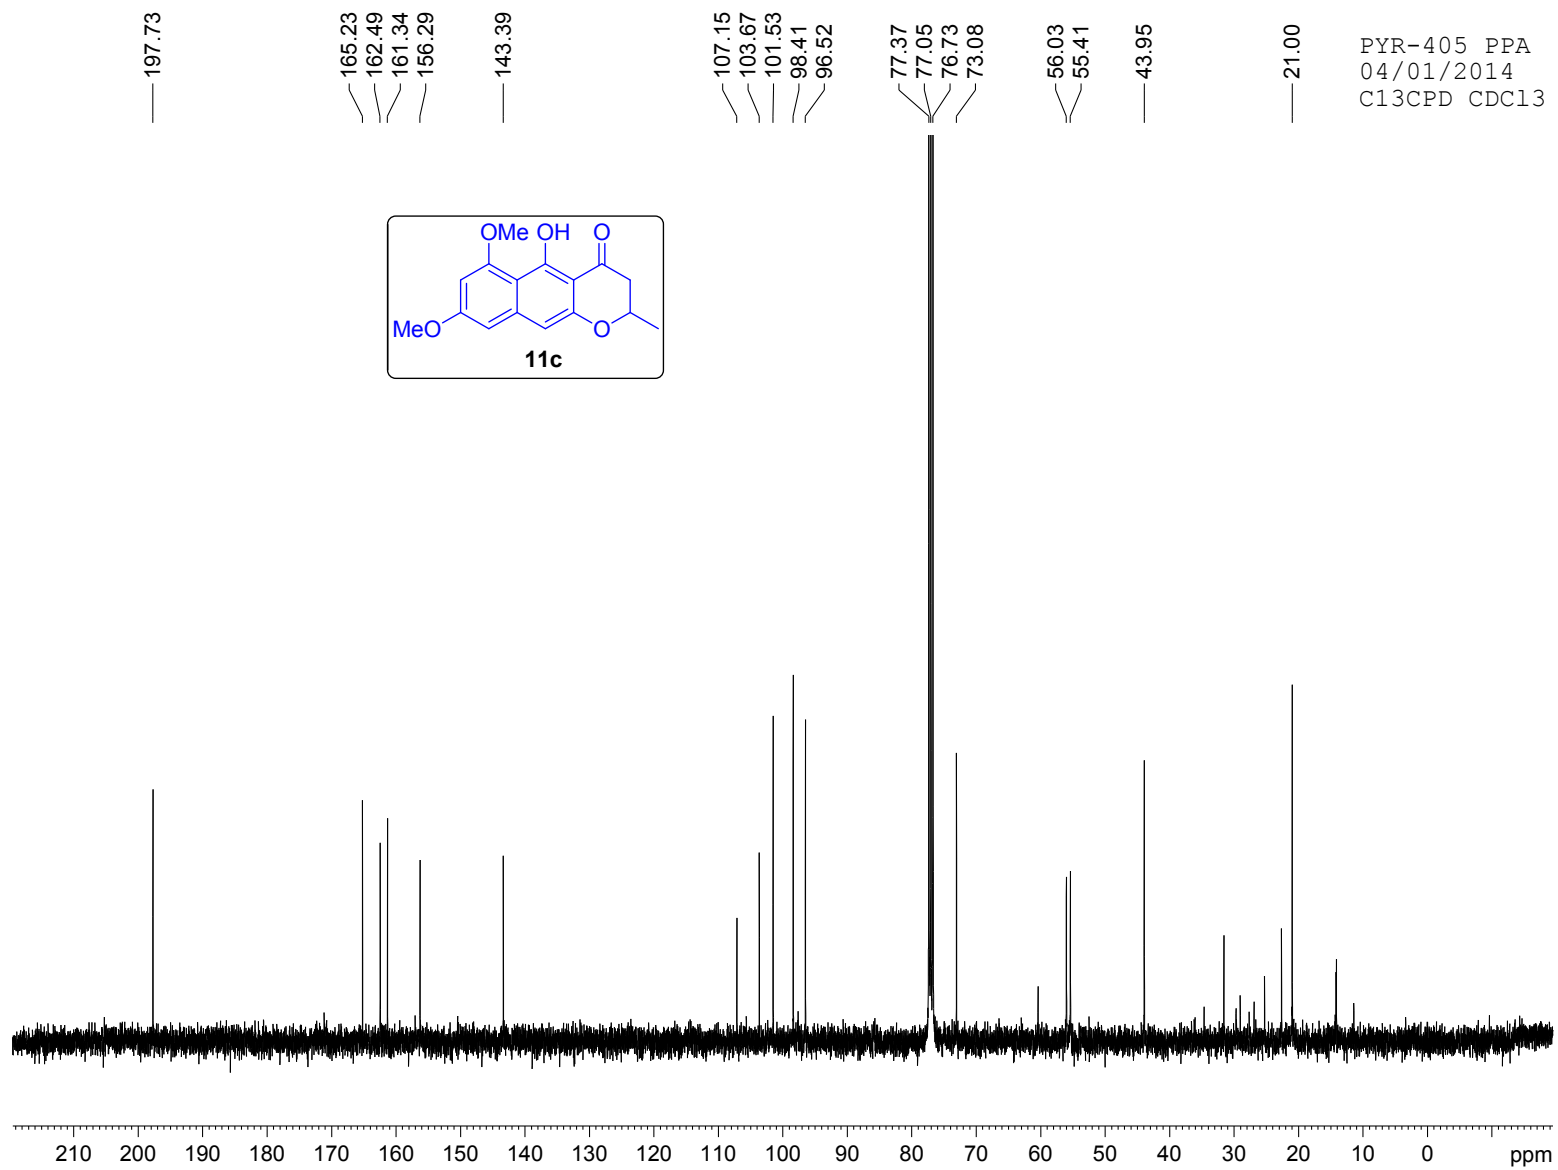

PYR-220a  
PROTON CDC13

—13.355

8.249  
8.229  
7.532  
7.513  
7.497  
7.480  
7.460  
7.300  
7.297  
7.280  
7.262  
7.260  
6.661

—2.781

—1.453

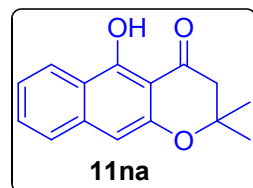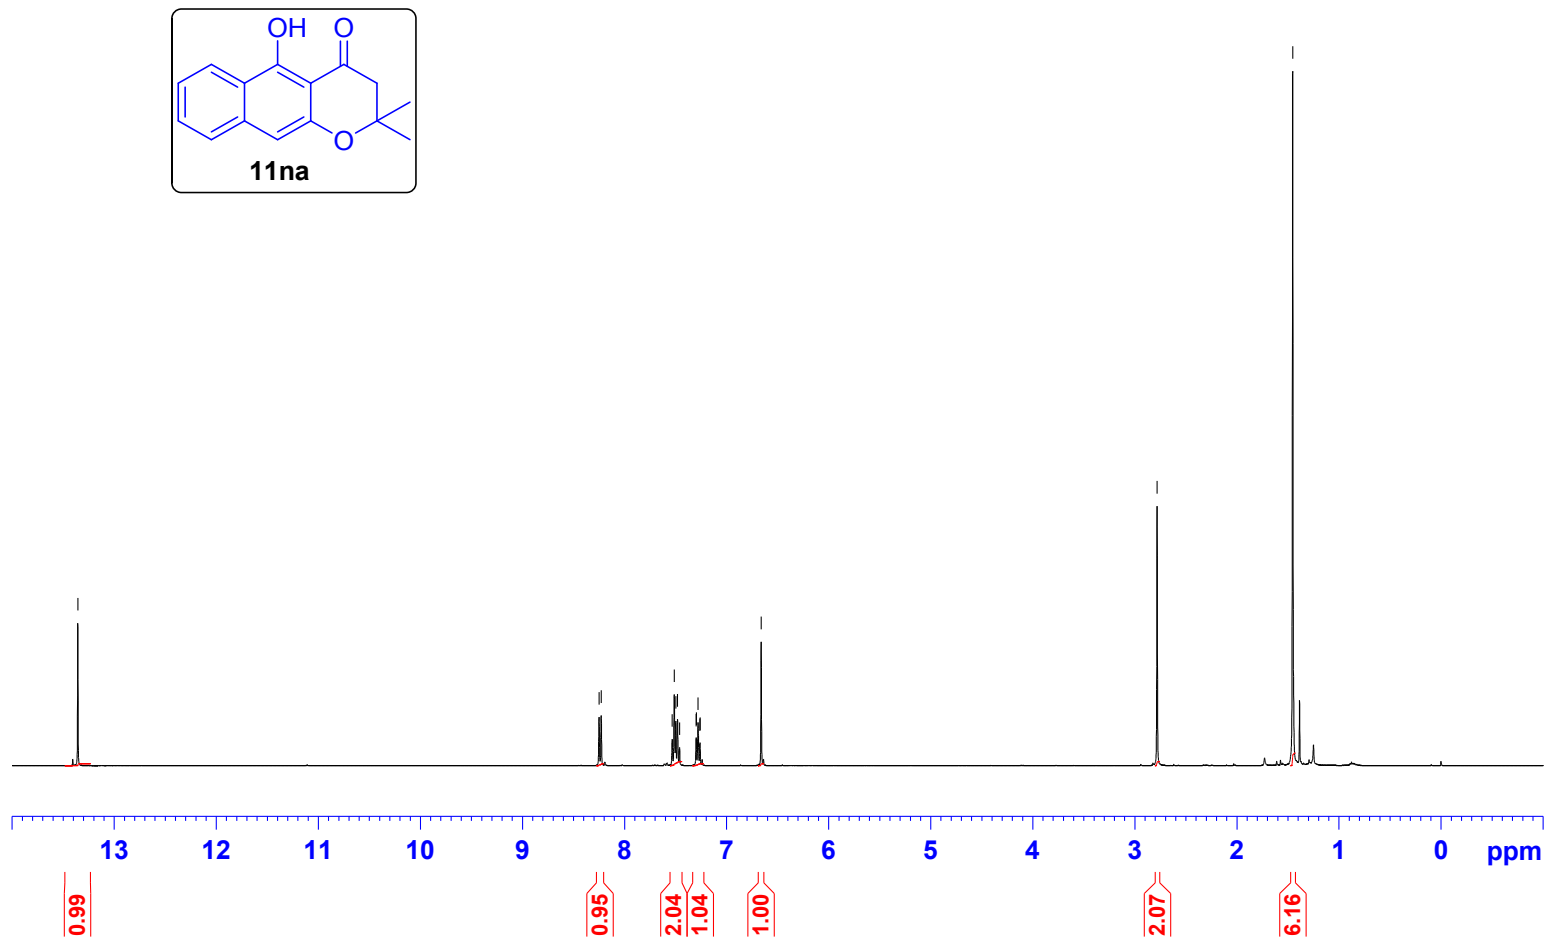

PYR -220a  
C13CPD CDC13

198.98  
162.42  
153.59  
139.05  
130.85  
126.48  
124.43  
123.50  
120.28  
104.43  
102.72  
77.98  
77.43  
77.11  
76.79  
48.63  
27.00

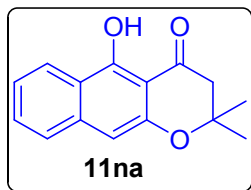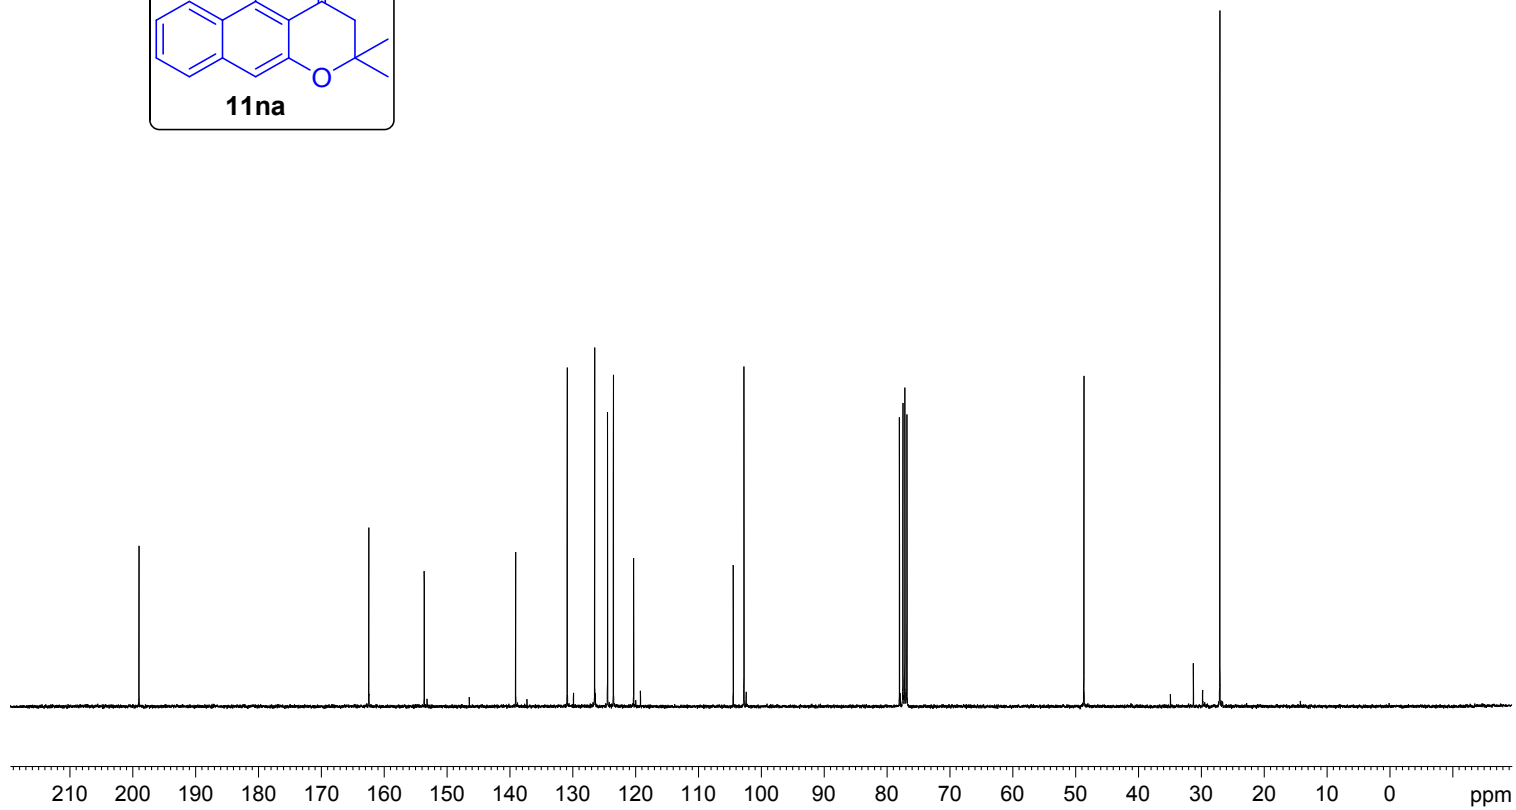

PYR -220a  
C13DEPT135 CDC13

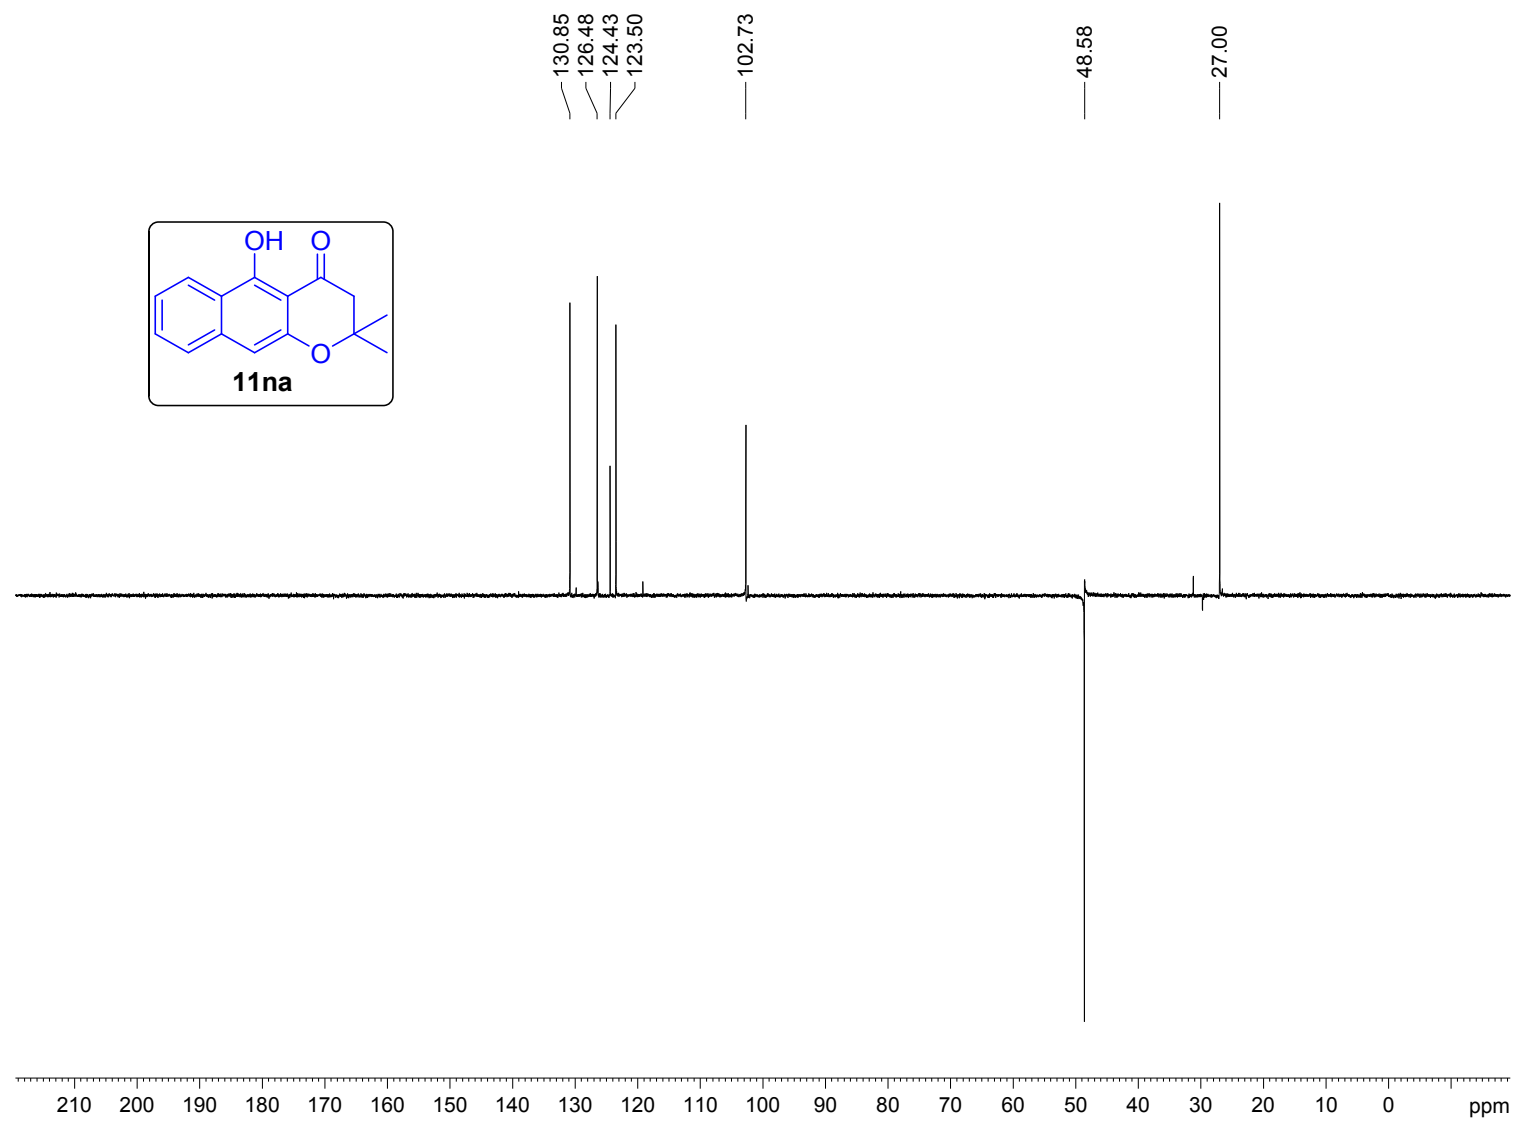

PYR-220b  
PROTON CDC13

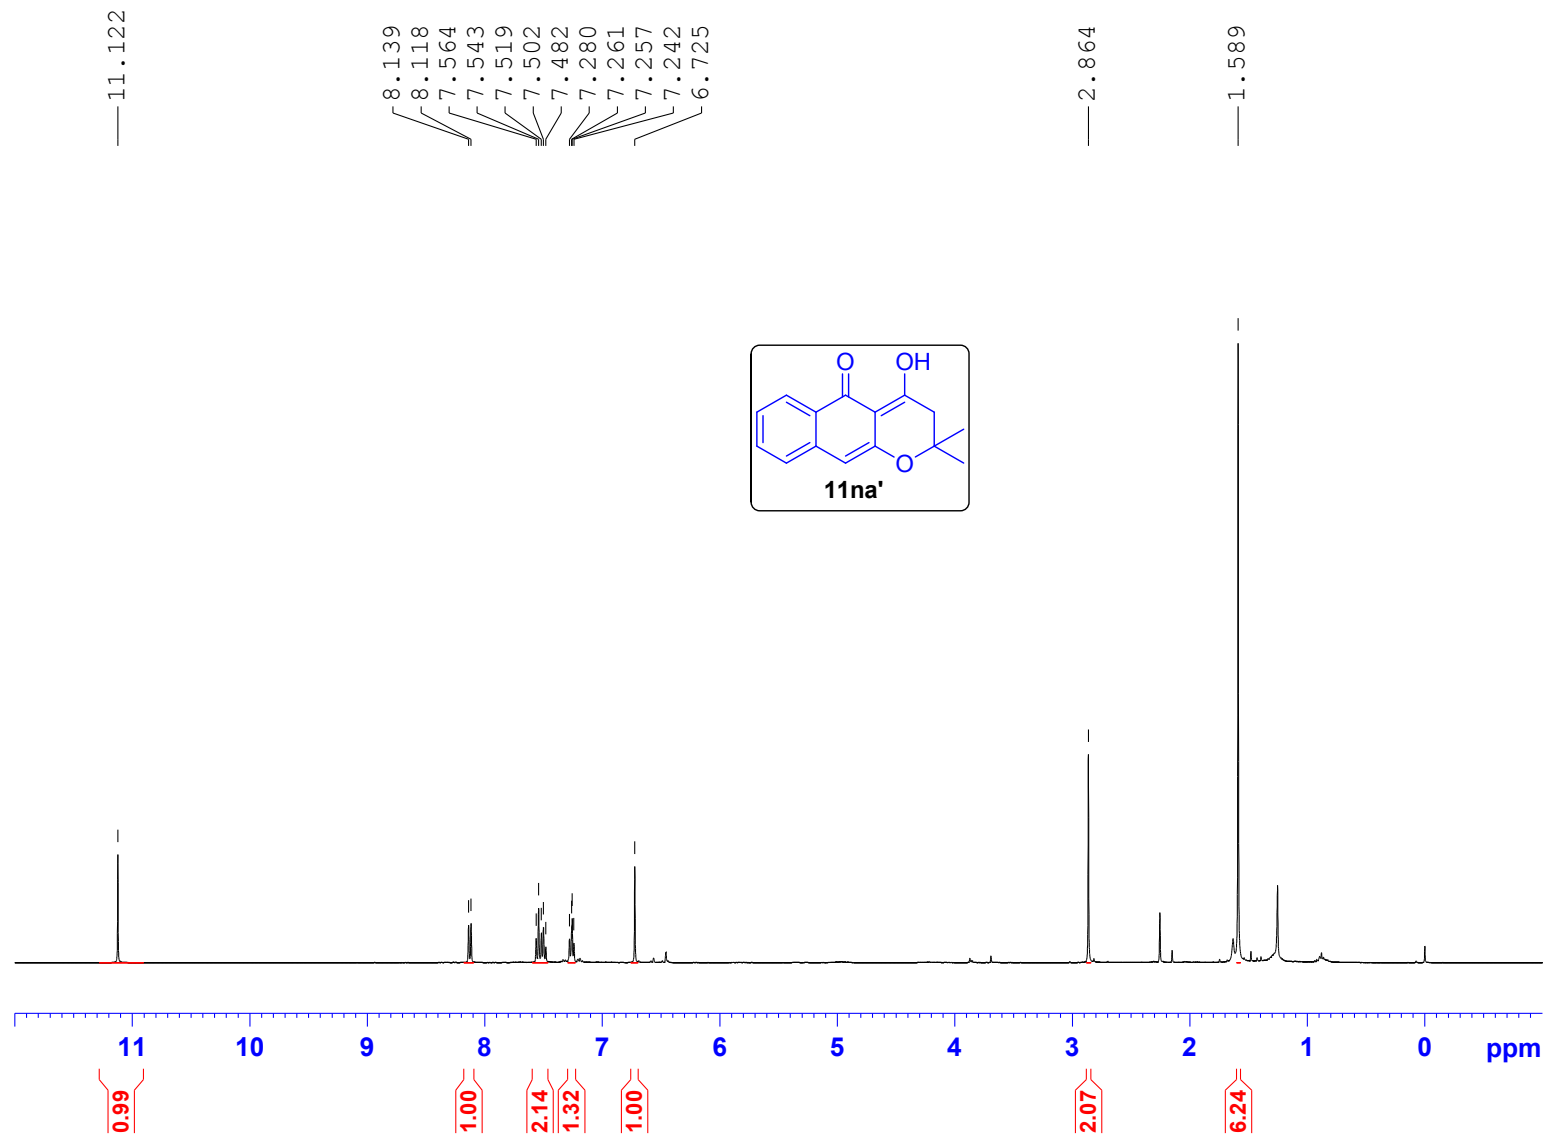

Pyr-220b  
C13CPD CDC13

197.89

159.44

155.60

139.38

130.72

126.40

123.94

123.08

119.49

105.29

102.58

80.43

77.36

77.04

76.72

47.98

26.55

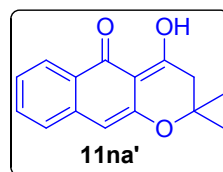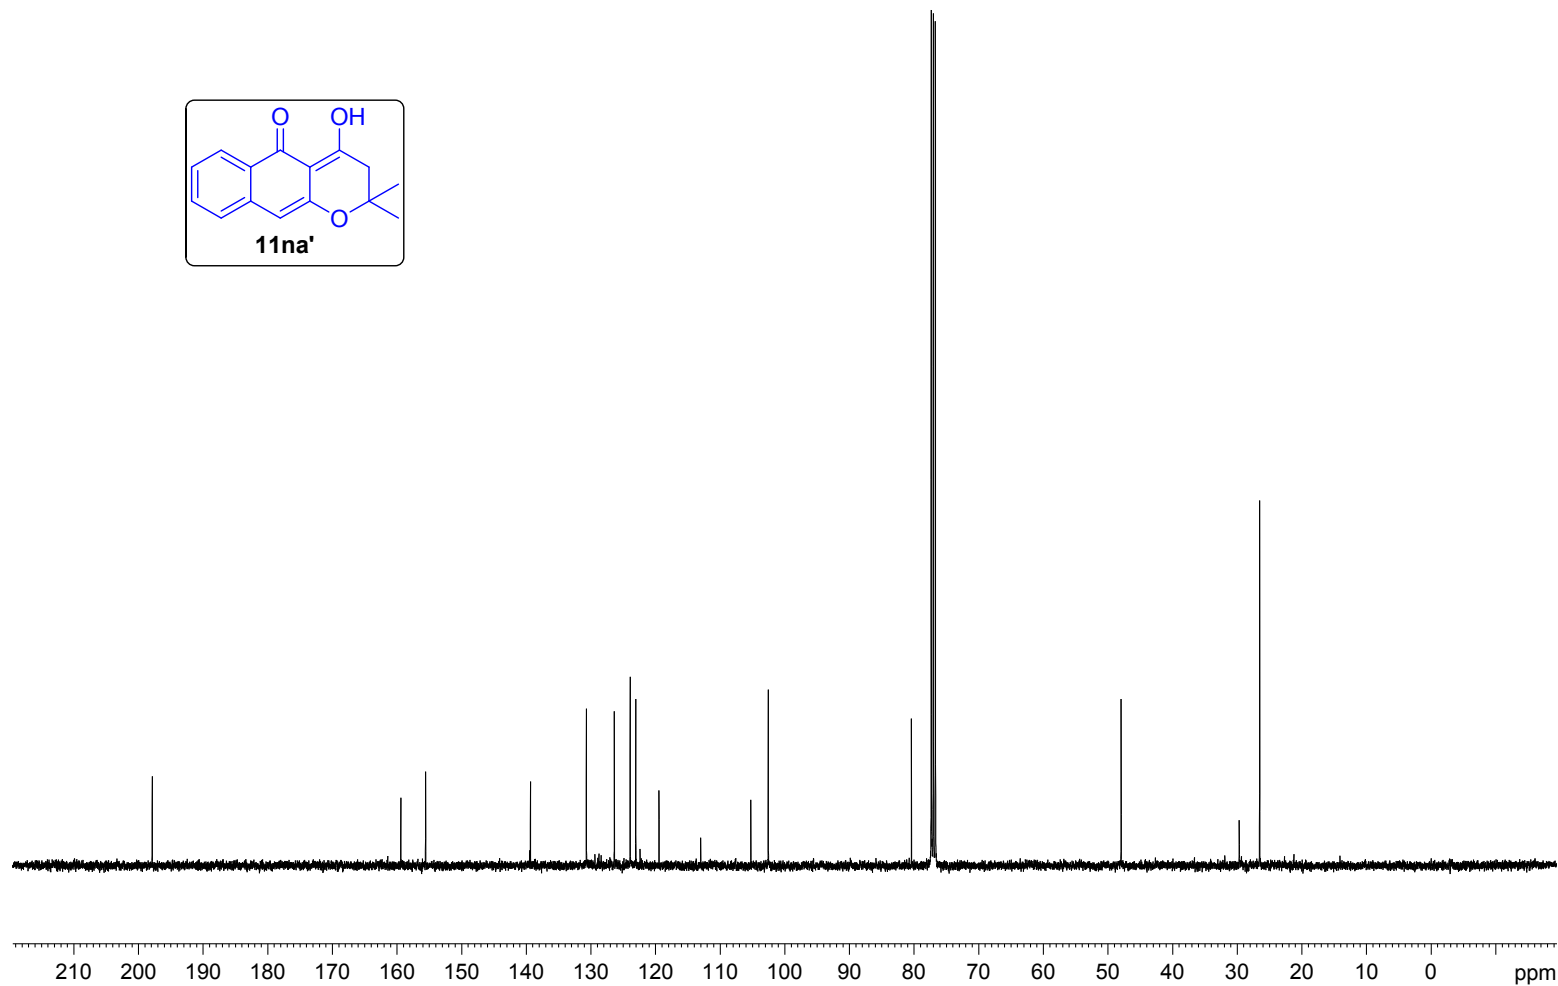

Pyr-220b  
C13DEPT135 CDC13

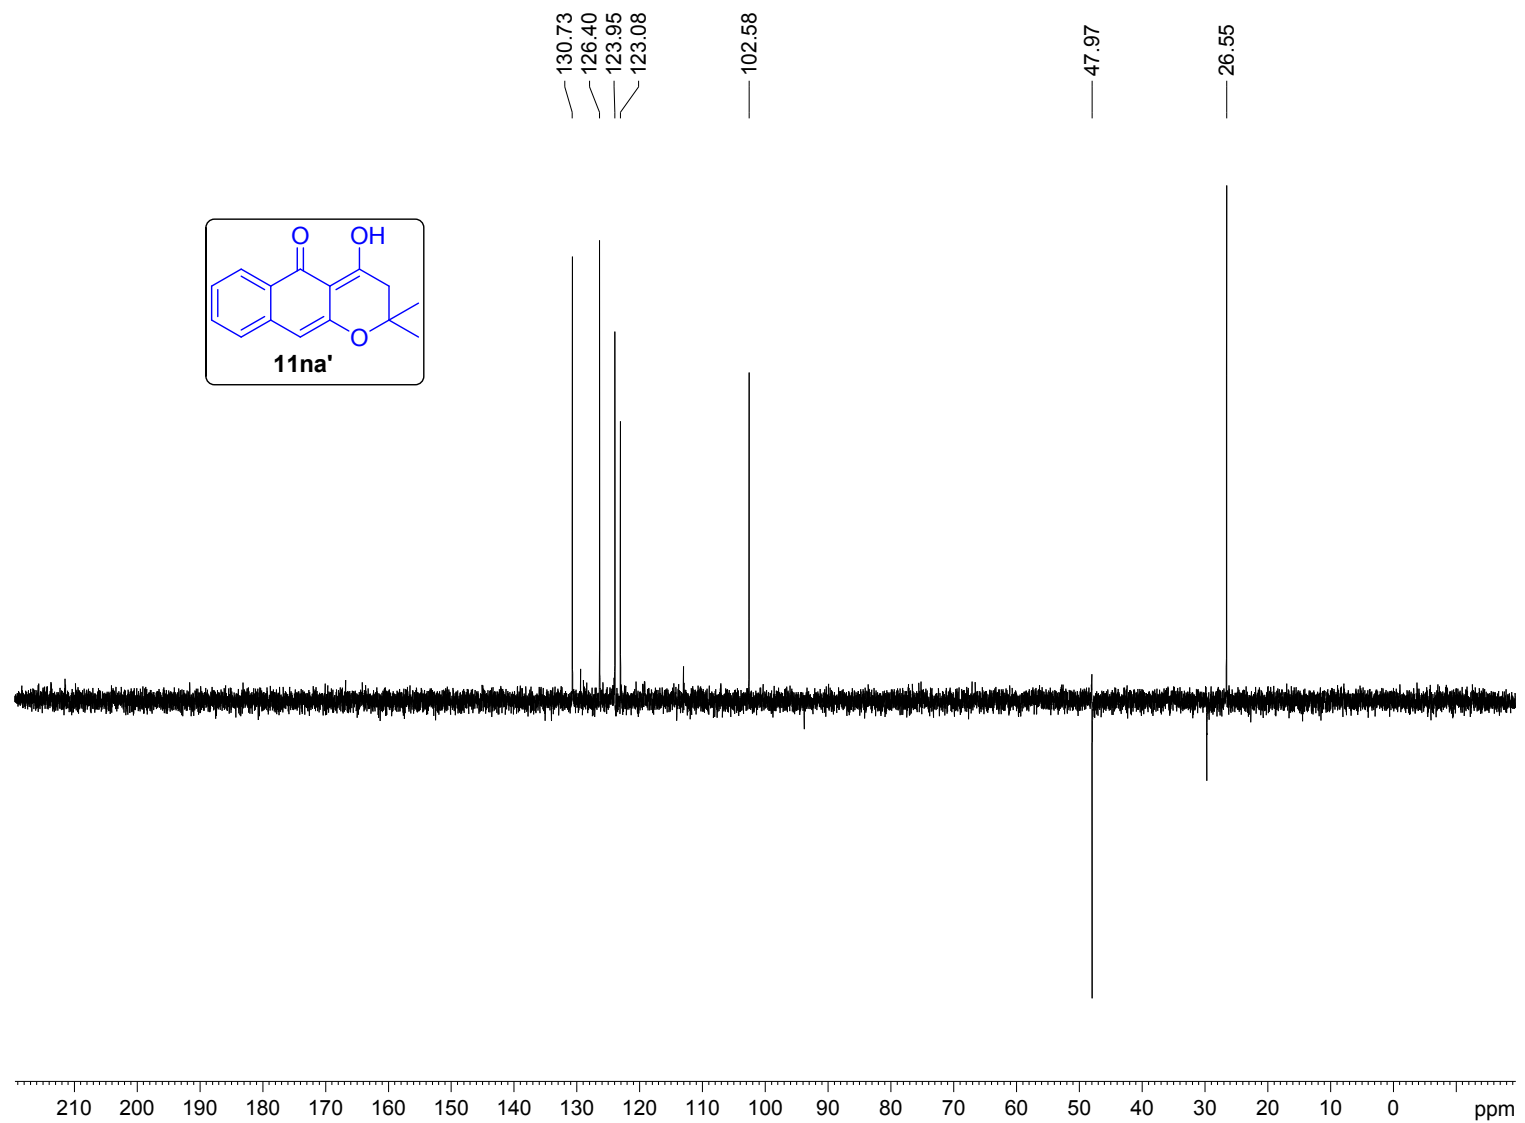



PA-DHNP-CR-Fr1  
PROTON CDCl3 17/04/2013

— 13.392

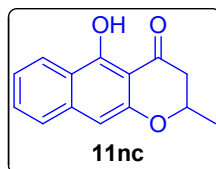

8.284  
8.263  
7.582  
7.562  
7.544  
7.527  
7.507  
7.339  
7.321  
7.302  
7.260  
6.724  
4.611  
4.596  
4.583  
4.570  
4.557  
4.543  
4.528  
2.846  
2.803  
2.775  
2.741  
1.540  
1.524

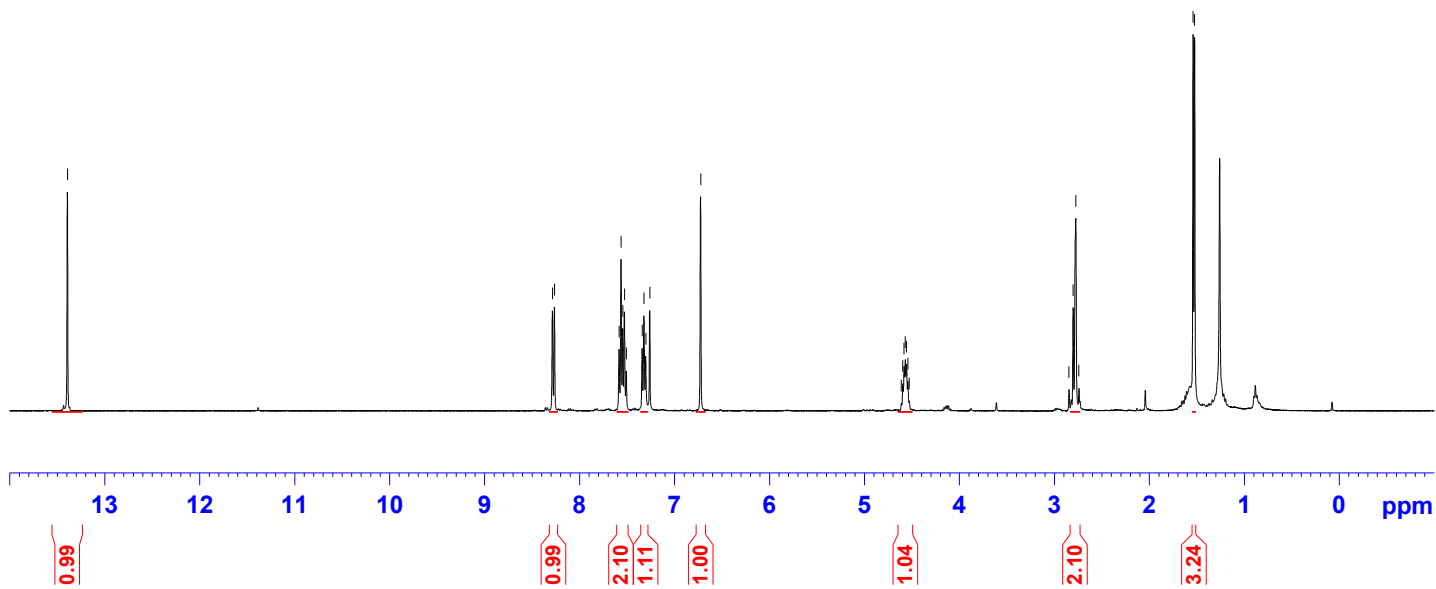

PA-DHNP-CR-Fr1  
C13CPD CDCl3 17.04.2014

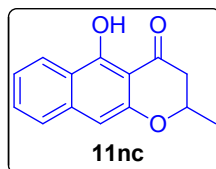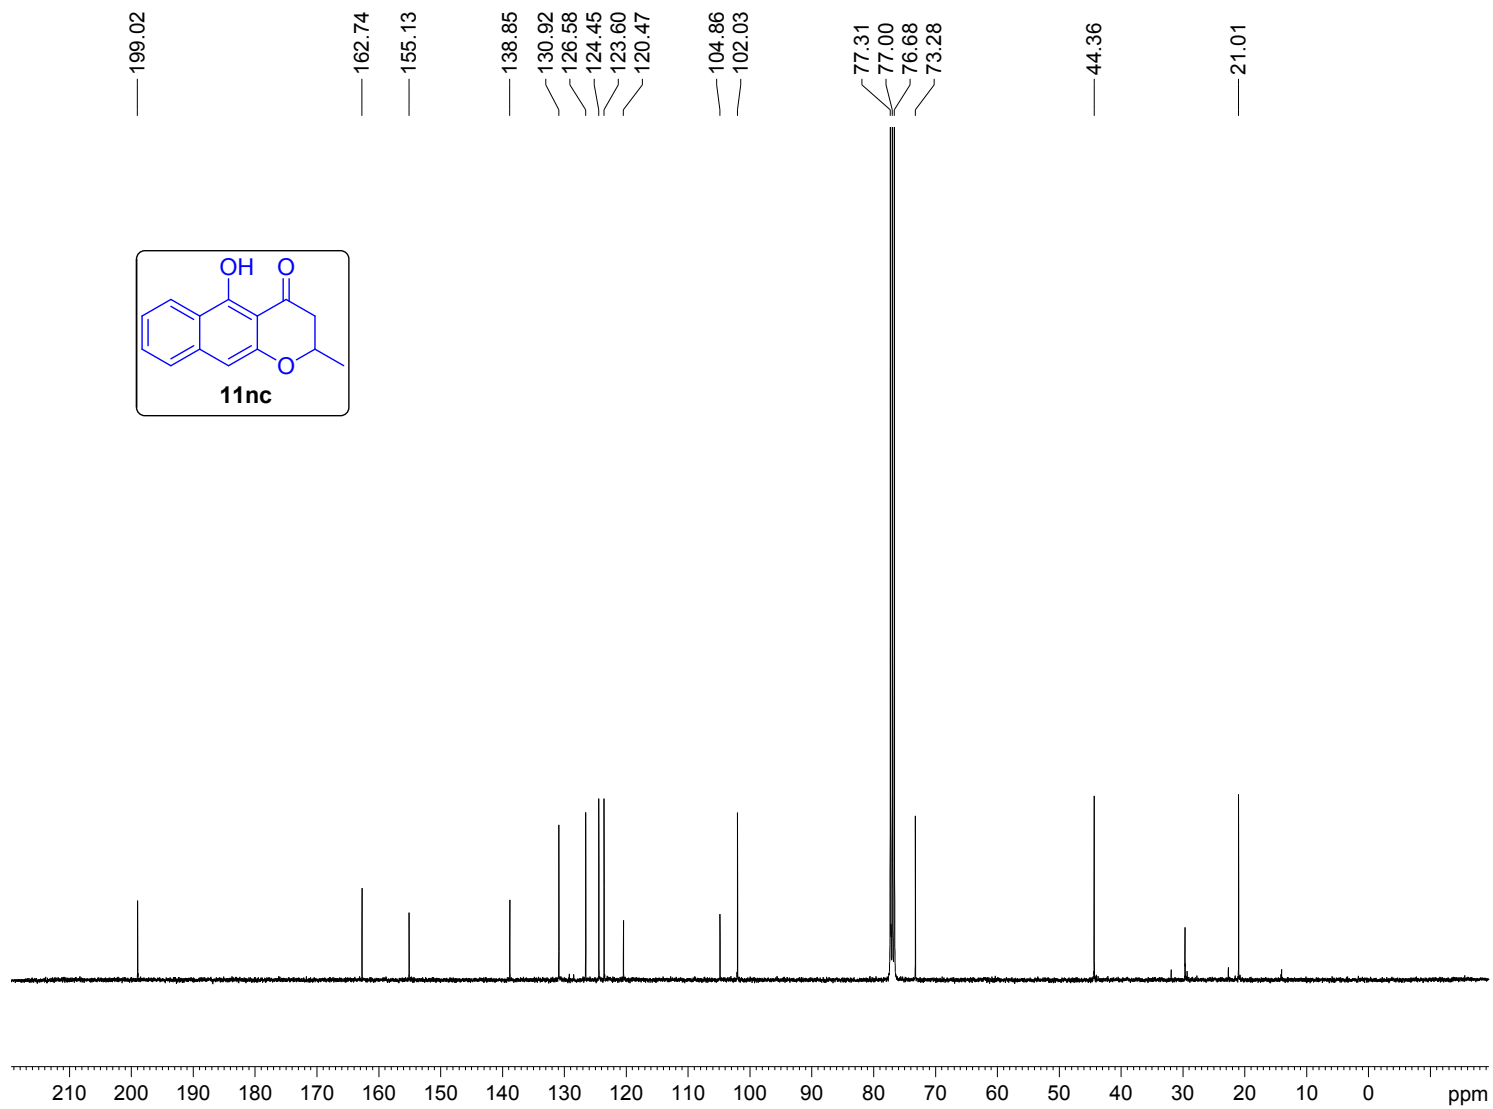

PA-DHNP-CR-Fr1  
C13DEPT135 CDC13 17.04.2014

130.93  
126.59  
124.45  
123.61

102.03

73.28

44.36

21.03

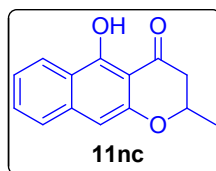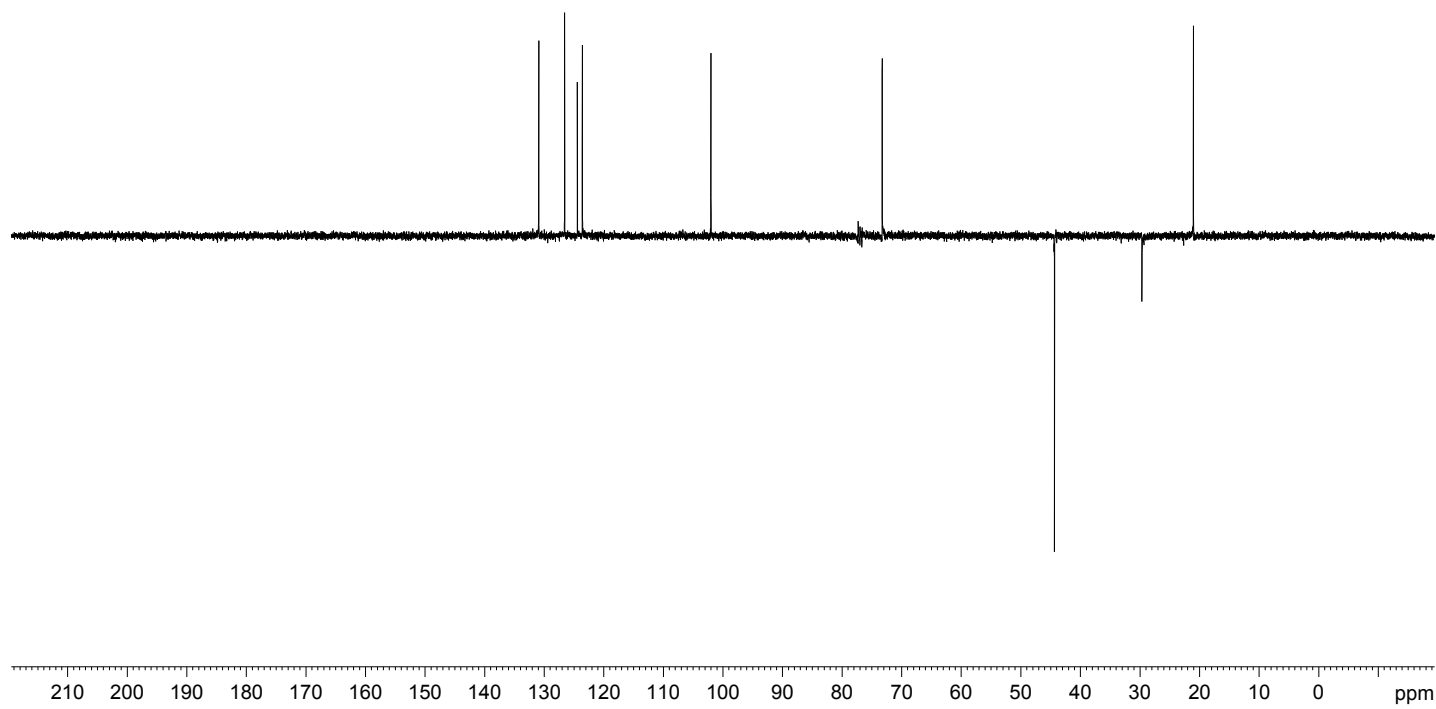

PA-DHNP-CR-Fr2 19/04/2014  
PROTON CDC13

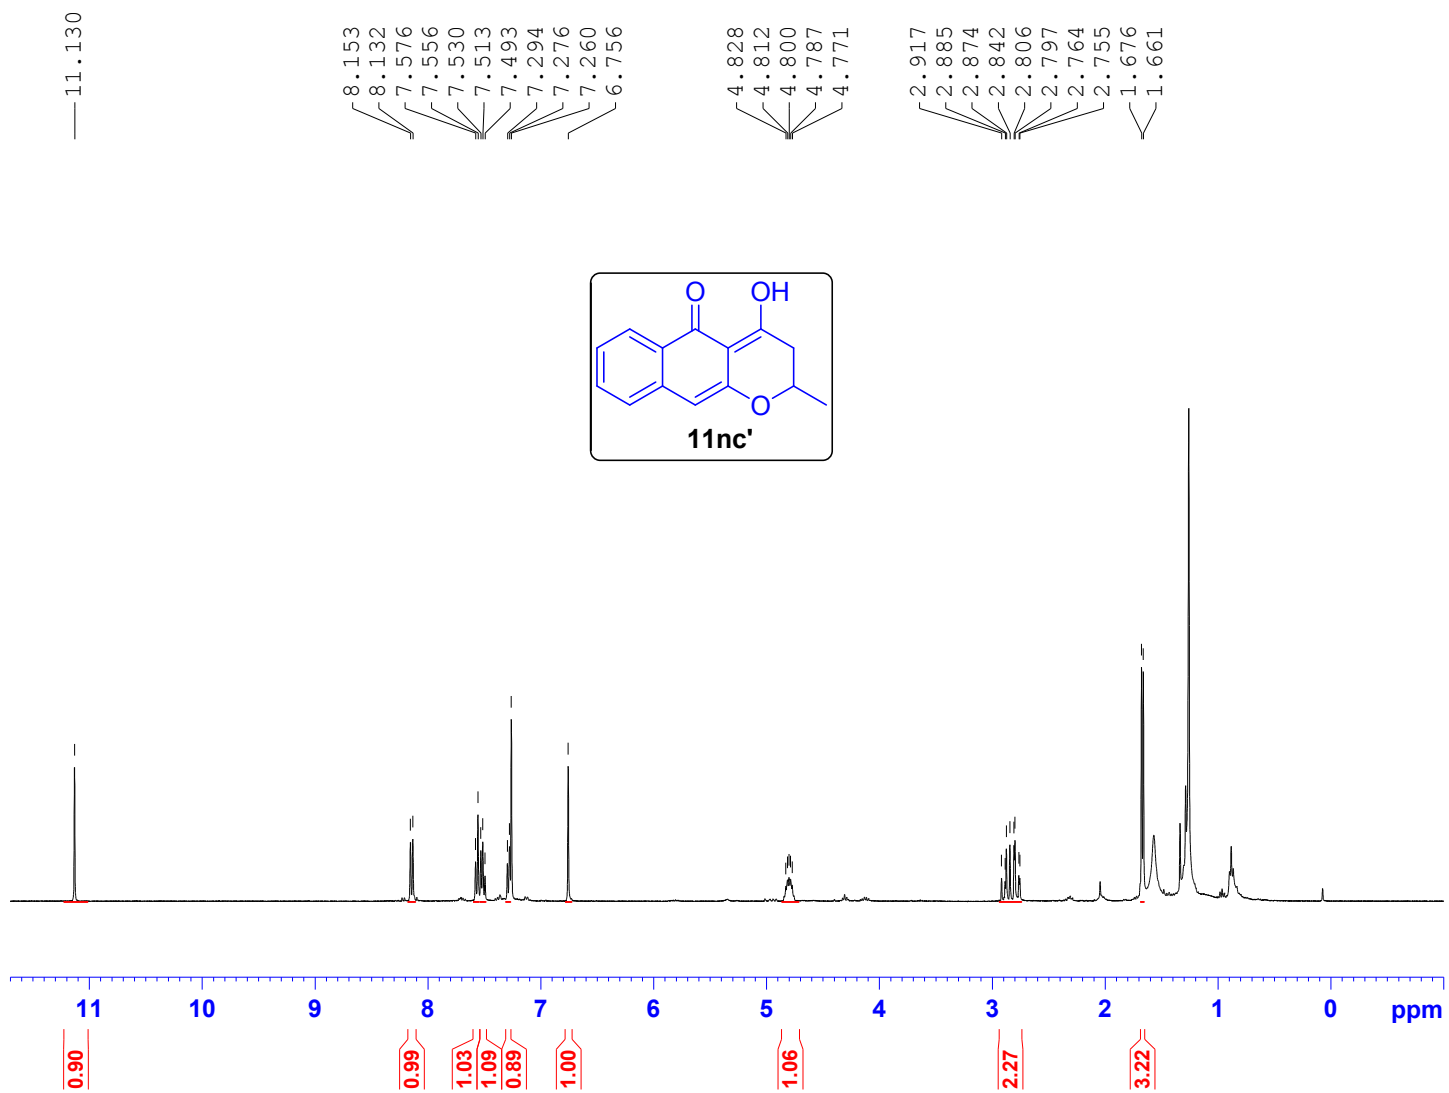

PA-DHNP-CR-Fr2 19/04/2014  
C13CPD CDCl3

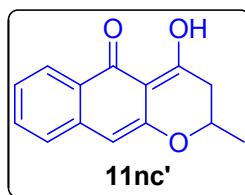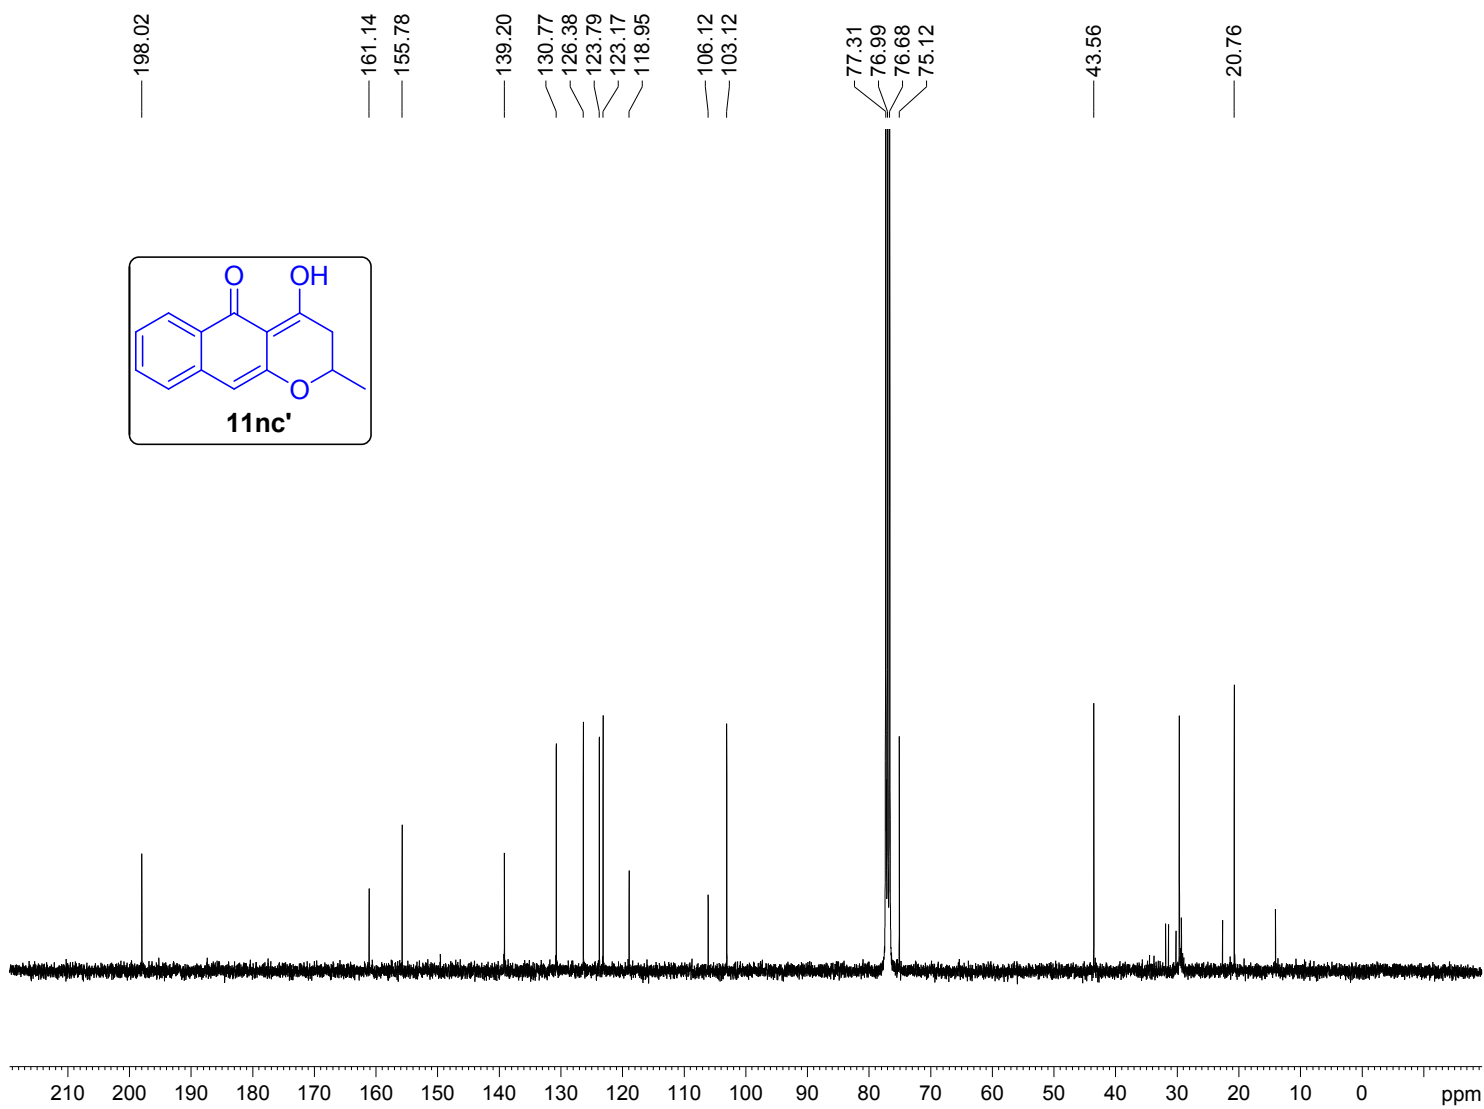

PA-DHNP-CR-Fr2  
C13DEPT135 CDC13

130.78  
126.39  
123.79  
123.18

103.11

75.12

43.55

20.78

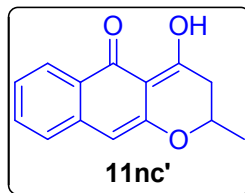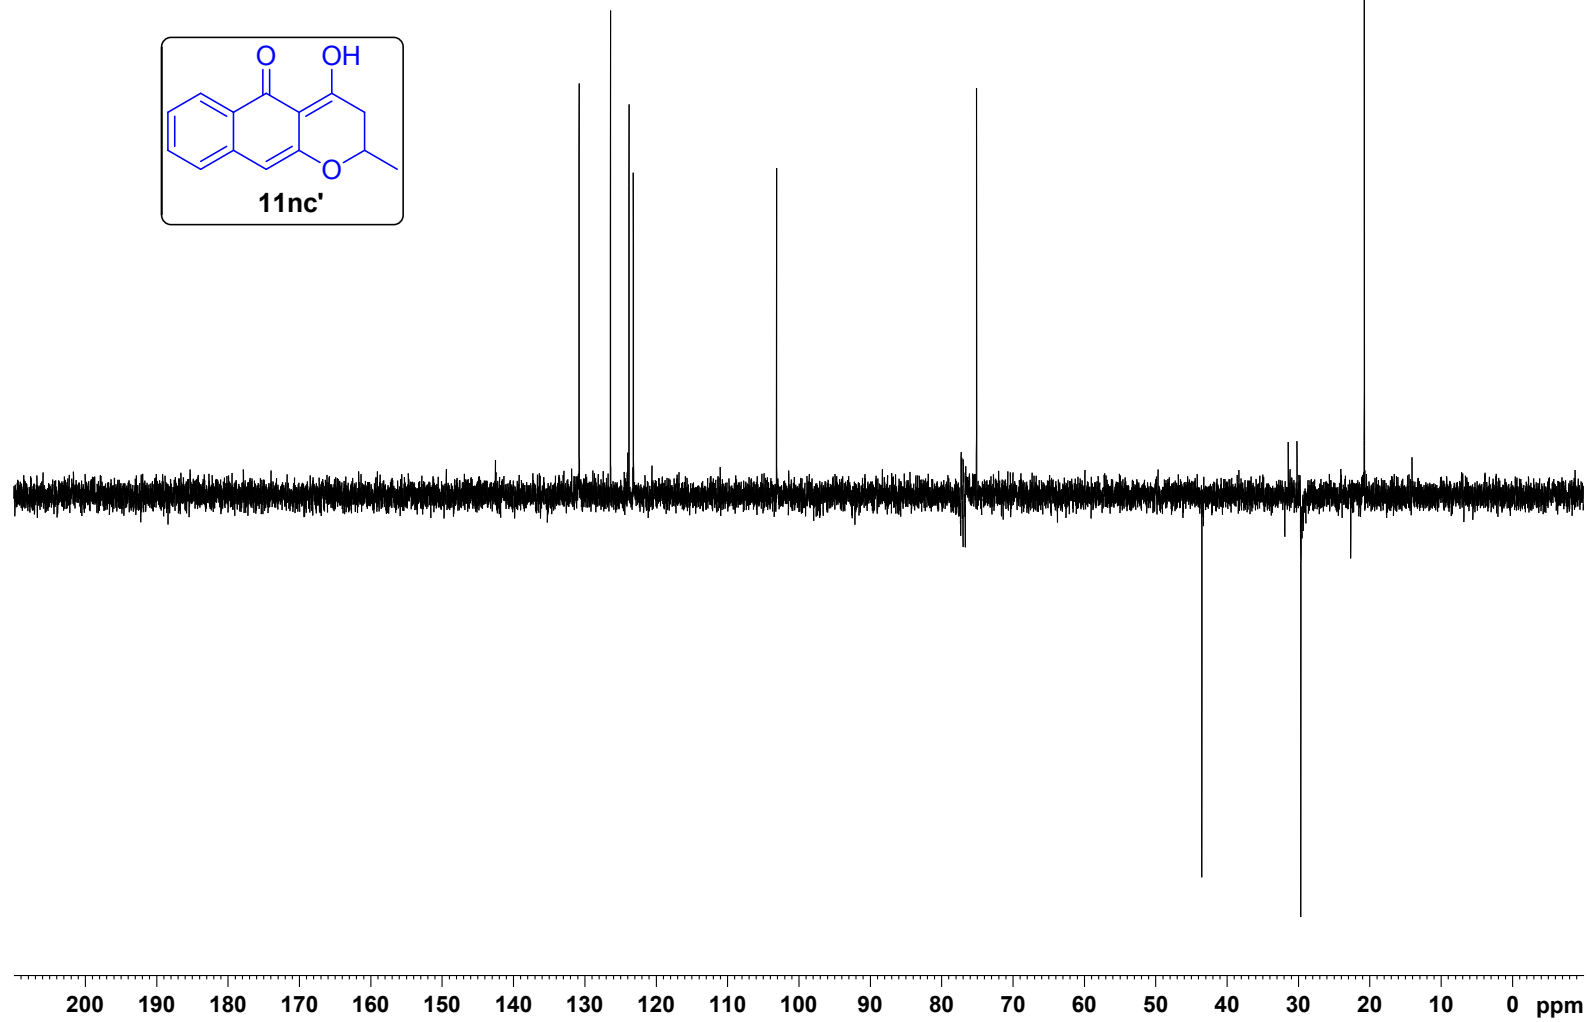

Supplement: c4ra11174e1.pdf [file c4ra11174e1.pdf]
